# Supplementary material for: Molecular evolution of the VacA p55 binding domain of Helicobacter pylori in mestizos from a high gastric cancer region of Colombia
Source: PeerJ. 2019 May 6;7:e6634. doi: 10.7717/peerj.6634 (PMC6507892; doi:10.7717/peerj.6634)
Supplement: Table S1 [file peerj-07-6634-s001.xlsx]

## Sheet: Tabelle1
	Strain	BioProject	Access code	p55 Sequence
	1039	PRJNA329371	WP_097679453.1	>1039GA:TVVNINRINTNADGTIRVGGYKASLTTNAAHLHIGKGGVNLSNQASGRSLLVENLTGNITVDGPLRVNNQVGGYALAGSSANFEFKAGTDTKNGTATFNNDISLGRFVNLKVDAHTANFKGIDTGNGGFNTLDFSGVTGKVNINKLITASTNVAVKNFNINELIVKTNGVSVGEYTHFSEDIGSQSRINTVRLETGTRSIFSGGVKFKSGEKLVIDEFYYSPWNYFDARNIKNVEITKKFASSTPENPWGTSKLMFNNLTLGQNAVMDYSQFSNLTIQGDFINNQGTINYLVRGGKVATLSVGNAAAMMFNNDIDSATGFYKPLIKINSAQDLIKNTEHVLLKAKIIGYGNVSTGTNGISNVNLEEQFKERLALYNNNNRMDTCVVRNTDD…
	1059	PRJNA329370	WP_078262674.1	>1059GA:TVVNIDRINTNADGTIRVGGYKASLTTNAAHLHIGKGGVNLSNQASGRTLLVENLTGNITVDGPLRVNNQVGGYALAGSSANFEFKAGTDTKNGTATFNNDISLGRFVNLKVDAHTANFKGIDTGNGGFNTLDFSGVTGKVNINKLITASTNVAAKNFNINELIVKTNGVSVGEYTHFSEDIGSQSRINTVRLETGTRSIFSGGVKFKSGEKLVIDEFYYSPWNYFDARNIKNVEITRKFASSTPENPWGTSKLMFNNLTLGQNAVMDYSQFSNLTIQGDFINNQGTINYLVRGGKVATLNVGNAAAMMFNNDIDSATGFYKPLIKINSAQDLIKNTEHVLLKAKIIGYGNVSTGTNGISNVNLEEQFKERLALYNNNNRMDTCVVRNTDD…
	1061	PRJNA329369	WP_097703016.1	>1061GA:TVVNIDRINTKADGTIKVGGFKASLTTNAAHLHIGKGGVNLSNQASGRTLLVENLTGNITVDGPLRVNNQVGGYALAGSSANFEFKAGVDTKNGTATFNNDISLGRFVNLKVDAHTANFKGIDTGNGGFNTLDFSGVTGKVNINKLITASTNVAVKNFNINELIVKTNGISVGEYTHFSEDIGSQSRINTVRLETGTRSIFSGGVKFKSGEKLVIDEFYYSPWNYFDARNVKNVEITRKFASSTPENPWGTSKLMFNNLTLGQNAVMDYSQFSNLTIQGDFINNQGTINYLVRGGQVATLNVGNAAAMMFNNDIDSATGFYKPLIKINSAQDLIKNTEHVLLKAKIIGYGNVSTGTNGISNVNLEEQFKERLALYNNNNRMDTCVVRNTDD…
	1077	PRJNA329368	WP_097555982.1	>1077GA:TVVNINRINTNADGTIRVGGYKASLTTNAAHLHIGKGGINLSNQASGRSLLVENLTGNITVDGPLRVNNQVGGYALAGSSANFEFKAGTDTKNGTATFNNDISLGRFVNLKVDAHTANFKGIDTGNGGFNTLDFSGVTGKVNINKLITASTNVAVKNFNINELIVKTNGVSVGEYTHFSENIGSQSRINTVRLETGTRSIFSGGVKFKGGEKLVINEFYYSPWNYFDARNIKNVEITRKFASSTPENPWGTSKLMFNNLTLGQNAVMDYSQFSNLTIQGDFINNQGTINYLVRGGQVATLNAGHQASMIFNNVVDSATGFYKPLIKINNAQNLTKNKEHVLVKARNIDYNLVGVQGASYDNISASNTNLQEQFKERLALYNNNNRMDICVV…
	1081	PRJNA329367	WP_097721031.1	>1081GA:TVVNIDRINTKADGTIKVGGFKASLTTNAAHLHIGKGGVNLSNQASGRTLLVENLTGNITVDGPLRVNNQVGGYALAGSSANFEFKAGTDTKNGTATFNNDISLGRFVNLKVDAHTANFKGIDTGNGGFNTLDFSGVTGKVNINKLITASTNVAVKNFNINELIVKTNGVSVGEYTHFSENIGSQSRINTVRLETGTRSIFSGGVKFKGGEKLVIDEFYYSPWNYFDARNIKNVEITRKFASSTPENPWGTSKLMFNNLTLGQNAVMDYSQFSNLTIQGDFINNQGTINYLVRGGQVATLNVGNAAAMMFNNDIDSTTGFYKPLIKINSAQDLIKNTEHVLLKAKIIGYGNVSTGTNGISNVNLEEQFKERLALYNNNNRMDTCVVRNTDD…
	1086	PRJNA329364	WP_097638639.1	>1086GA:TVVNIDRINTKADGTIRVGGYKASLTTNAAHLHIGKGGINLSNQASGRSLLVENLTGNITVDGPLRVNNQVGGYALAGSSANFEFKAGTDTKNGTATFNNDISLGRFVNLKVDAHTANFKGIDTGNGGFNTLDFSGVTGKVNINKLITASTNVAVKNFNINELIVKTNGVSVGEYTHFSEDIGSQSHINTVRLETGTRSIFSGGVKFKSGEKLVINEFYYSPWNYFDARNIKNVEITRKFASSTPENPWGTSKLMFNNLTLGQNAVMDYSQFSNLTIQGDFINNQGTINYLVRGGKVATLNVGNAAAMMFNNDIDSATGFYKPLIKINSAQDLIKNTEHVLVKAKIIGYGNVSTGTNGISNVNLEEQFKERLALYNNNNRMDTCVVRNTDD…
	1093	PRJNA329363	WP_097567230.1	>1093GA:TVVNINRINTNADGTIRVGGYKASLTTNAAHLNIGKGGVNLSNQASGRTLLVENLTGNITVDGPLRVNNQVGGYALAGSSANFEFKAGTDTKNGTATFNNDISLGRFVNLKVDAHTANFKGIDTGNGGFNTLDFSGVTGKVNINKLITASTNVAVKNFNINELIVKTNGVSVGEYTHFSEDIGSQSRINTVRLETGTRSIFSGGVKFKSGEKLVINEFYYSPWNYFDARNIKNVEITRKFASSTPENPWGTSKLMFNNLTLGQNAVMDYSQFSNLTIQGDFINNQGTINYLVRGGKVATLSVGNAAAMMFNNDIDSATGFYKPLIKINSAQDLIKNTEHVLLKAKIIGYGNVSTGTNGISNVNLEEQFKERLALYNNNNRMDTCVVRNTDD…
	1095	PRJNA329362	WP_097556837.1	>1095GA:TVVNIDRINTKADGTIRVGGYKASLTTNAAHLHIGKGGVNLSNQASGRSLLVENLTGNITVDGALRVNNQVGGYALAGSSANFEFKAGTDTKNGTATFNNDISLGRFVNLKVDAHTANFKGIDTGNGGFNTLDFSGVTDKVNINKLITASTNVAAKNFNINELIVKTNGVSVGEYTHFSEDIGSQSRINTVRLETGTRSIFSGGVKFKSGEKLVINEFYYSPWNYFDARNVKNVEITRKFASSTPENPWGTSKLMFNNLTLGQNAVMDYSQFSNLTIQGDFINNQGTINYLVRGGKVATLNAGHQASMIFNNVVDSATGFYKPLIKINNAQNLTKNKEHVLVKARNIDYNLVGVQGASYDNISASNTNLQEQFKERLALYNNNNRMDICVV…
	1102	PRJNA329361	WP_097716442.1	>1102GA:TVVNIDRINTNADGTIRVGGYKASLTTNAAHLHIGKGGVNLSNQASGRSLLVENLTGNITVDGPLRVNNQVGGYALAGSSANFEFKAGTDTKNGTATFNNDISLGRFVNLKVDAHTANFKGIDTGNGGFNTLDFSGVTGKVNINKLITASTNVAVKNFNINELIVKTNGVSVGEYTHFSEDIGSQSRINTVRLETGTRSIFSGGVKFKGGEKLVIDEFYYSPWNYFDARNIKNVEITRKFASSTPENPWGTSKLMFNNLTLGQNAVMDYSQFSNLTIQGDFINNQGTINYLVRGGKVATLNVGNAAAMMFNNDIDSATGFYKPLMKINSAQDLIKNTEHVLLKAKIIGYGNVSTGTNGISNVNLEEQFKERLALYNNNNRMDTCVVRNTDD…
	2007	PRJNA329359	WP_097694292.1	>2007IM:TVVNINRINTNADGTIRVGGYKASLTTNAAHLHIGKGGINLSNQASGRSLLVENLTGNITVDGPLRVNNQVGGYALAGSSANFEFKAGTDTKNGTATFNNDISLGRFVNLKVDAHTANFKGIDTGNGGFNTLDFSGVTGKVNINKLITASTNVAVKNFNINELIVKTNGVSVGEYTHFSEDIGSQSRINTVRLETGTRSIYSGGVKFKGGEKLVINDFYYAPWNYFDARNIKNVEITRKFASSTPENPWGTSKLMFNNLTLGQNAIMDYSQFSNLTIQGDFINNQGTINYLVRGGQVATLNVGNAAAMMFNNDIDSATGFYKPLIKINSAQDLIKNTEHVLLKAKIIGYGNVSTGTNGISNVNLEEQFKERLALYNNNNRMDTCVVRNTDD…
	2010	PRJNA329358	WP_097701479.1	>2010IM:TVVNIDRINTKADGTIRVGGYKASLTTNAAHLHIGKGGVNLSNQASGRSLLVENLTGNITVDGPLRVNNQVGGYALAGSSANFEFKAGTDTKNGTATFNNDISLGRFVNLKVDAHTANFKGIDTGNGGFNTLDFSGVTDKVNINKLITASTNVAIKNFNINELIVKTNGVSVGEYTHFSEDIGSQSRINTVRLETGTRSIYSGGVKFKGGEKLVINDFYYAPWNYFDARNIKNVEITNKLAFGPQGSPWGTSKLMFNNLTLGQNAVMDYSQFSNLTIQGDFINNQGTINYLVRGGQVATLNVGNAAAMMFNNDIDSATGFYKPLMKINSAQDLIKNTEHVLLKAKIIGYGNVSTGTNGISNVNLEEQFKERLALYNNNNRMDTCVVRNTDD…
	2015	PRJNA329355	WP_097700485.1	>2015G:TVVNIFHLNTKADGTLRAGGFKASLSTNAAHLHIGEGGINLSNQASGRTLLVENLTGNITVEGTLRVNNQVGGAAVAGSSANFEFKAGEDTNNATATFNNDIHLGKAVNLRVDAHTAYFNGNVYLGKSTNLRVNGHSAHFKNIDASKSDNGLNTSALDFSGVTDKVNINKLTTSATNVNVKNFDIKELVVTTRVQSFGQYTIFGENIGDKSRIGVVSLQTGYSPAYSGGVTFKSGKKLVIDEIYHAPWNYFDARNVTDVEINKRILFGAPGNIAGKTGLMFNNLTLNSNASMDYGKDLDLTIQRHFTNNQGTMNLFVQDGRVATLNAGHQASMIFNNLVDSATGFYKPLIKINNAQNLTKNKEHVLVKARNIDYNLVGVQGASYDNISASNT…
	2020	PRJNA329354	WP_097719295.1	>2020G:TVVNIFHLNTKADGTLRAGGFKASLSTNAAHLNIGEGGVNLSNQASGRSLLVENLTGNITVEGTLRVNNQVGGAAVAGSSANFEFKAGEDTNNATATFNNDIHLGKAVNLRVDAHTAYFNGNIYLGKSTNLRVNGHSAHFKNIDASKSDNGLNTSALDFSGVTDKVNINKLTTSATNVNIKNFDIKELVVTTRVQSFGQYTIFGENIGDKSRIGVVSLQTGYSPAYSGGVTFKSGKKLVIDEIYHAPWNYFDARNVTDVEINKRILFGAPGNIAGKTGLMFNNLTLNSNASMDYGKDLDLTIQRHFTNNQGTMNLFVQDGRVATLNAGHQASMIFNNVVDSATGFYKPLIKINNAQNLTKNKEHVLVKARNIDYNLVGVQGASYDNISASNT…
	2021	PRJNA329353	WP_097678684.1	>2021IM:TVVNIDRINTNADGTIRVGGFKASLTTNAAHLHIGKGGVNLSNQASGRSLLVENLTGNITVDGPLRVNNQVGGAALAGSSANFEFKAGTDTKNGTATFNNDISLGRFVNLKVDAHTANFKGIDTGNGGFNTLDFSGVTGKVNINKLITASTNVAVKNFNINELIVKTNGVSVGEYTHFSEDIGSQSRINTVRLETGTRSIFSGGVKFKSGEKLVIDEFYYSPWNYFDARNIKNVEITRKFASSTPENPWGTSKLMFNNLTLGQNAVMDYSQFSNLTIQGDFINNQGTINYLVRGGQVATLNVGNAAAMMFNNDIDSATGFYKPLIKINSAQDLIKNTEHVLLKAKIIGYGNVSTGTNGISNVNLEEQFKERLALYNNNNRMDTCVVRNTDD…
	2025	PRJNA329352	WP_097714339.1	>2025G:TVVNIDRINTNADGTIRVGGYKASLTTNAAHLHIGKGGVNLSNQASGRSLLVENLTGNITVDGPLRVNNQVGGYALAGSSANFEFKAGTDTKNGTATFNNDISLGRFVNLRVDAHTANFKGIDTGNGGFNTLDFSGVTGKVNINKLITASTNVAVKNFNINELIVKTNGVSVGEYTHFSEDIGSQSRINTVRLETGTRSIFSGGVKFKSGEKLVINEFYYSPWNYFDARNIKNVEITRKFASSTPENPWGTSKLMFNNLTLGQNAVMDYSQFSNLTIQGDFINNQGTINYLVRGGQVATLNVGNAAAMMFNNDIDSATGFYKPLIKINSAQDLIKNTEHVLLKAKIIGYGNVSTGTNGISNVNLEEQFKERLALYNNNNRMDTCVVRNTDDI…
	2027	PRJNA329351	WP_097693221.1	>2027IM:TVVNIDRINTNADGTIRVGGYKASLTTNAAHLHIGKGGVNLSNQASGRSLLVENLTGNITVDGPLRVNNQVGGYALAGSSANFEFKAGTDTKNGTATFNNDISLGRFVNLKVDAHTANFKGIDTGNGGFNTLDFSGVTGKVNINKLITASTNVAVKNFNINELIVKTNGVSVGEYTHFSEDIGSQSRINTVRLETGTRSIFSGGVKFKSGEKLVIDEFYYSPWNYFDARNIKNVEITKKFASSTPENPWGTSKLMFNNLTLGQNAVMDYSQFSNLTIQGDFINNQGTINYLVRGGKVATLSVGNAAAMMFNNDIDSATGFYKPLIKINSAQDLIKNTEHVLLKAKIIGYGNVSTGTNGISNVNLEEQFKERLALYNNNNRMDTCVVRNTDD…
	2029	PRJNA329350	WP_097559047.1	>2029IM:TVVNIDRINTKADGTIKVGGYKASLTTNAAHLNIGKGGVNLSNQASGRTLLVENLTGNITVNGPLRVNNQVGGYALAGSSANFEFKAGTDTKNGTATFNNDISLGRFVNLKVDAHTANFKGIDTGNGGFNTLDFSGVTGKVNINKLITASTNVAVKNFNINELIVKTNGVSVGEYTHFSENIGSQSRINTVRLETGTRSIFSGGVKFKGGEKLVIDEFYYSPWNYFDARNIKNVEITRKFASSTPENPWGTSKLMFNNLTLGQNAVMDYSQFSNLTIQGDFINNQGTINYLVRGGQVATLNVGNAAAMMFNNDIDSTTGFYKPLIKINSAQDLIKNTEHVLLKAKIIGYGNVSTGTNGISNVNLEEQFKERLALYNNNNRMDTCVVRNTDD…
	2036	PRJNA329348	WP_097692776.1	>2036AG:TVVNIDRINTKADGTIRVGGYKASLTTNAAHLHIGKGGVNLSNQASGRTLLVENLTGNITVDGPLRVNNQVGGYALAGSSANFEFKAGTDTKNGTATFNNDISLGRFVNLKVDAHTANFKGIDTGNGGFNTLDFSGVTGKVNINKLITASTNVAVKNFNINELIVKTNGVSVGEYTHFSENIGSQSRINTVRLETGTRSIFSGGVKFKGGEKLVIDEFYYSPWNYFDARNIKNVEITKKFASSTPENPWGTSKLMFNNLTLGQNAIMDYSQFSNLTIQGDFINNQGTINYLVRGGKVATLNVGNAAAMMFNNDIDSATGFYKPLIKINSAQDLIKNTEHVLLKAKIIGYGNVSTGTNGISNVNLEEQFKERLALYNNNNRMDTCVVRNTDD…
	2040	PRJNA329346	WP_097718567.1	>2040AG:TVVNIDRINTNADGTIRVGGYKASLTTNAAHLHIGKGGVNLSNQASGRSLLVENLTGNITVDGPLRVNNQVGGYALAGSSANFEFKAGTDTKNGTATFNNDISLGRFVNLKVDAHTANFKGIDTGNGGFNTLDFSGVTGKVNINKLITASTNVAVKNFNINELIVKTNGVSVGEYTHFSEDIGSQSRINTVRLETGTRSIFSGGVKFKSGEKLVINEFYYSPWNYFDARNIKNVEITRKFASSTPENPWGTSKLMFNNLTLGQNAVMDYSQFSNLTIQGDFINNQGTINYLVRGGKVATLSVGNAAAMMFNNDIDSATGFYKPLIKINSAQDLIKNTEHVLLKAKIIGYGNVSTGTNGISNVNLEEQFKERLALYNNNNRMDTCVVRNTDD…
	2047	PRJNA329345	WP_097691452.1	>2047IM:TVVNIDRINTKADGTIKVGGFKASLTTNAAHLHIGKGGVNLSNQASGRTLLVENLTGNITVDGPLRVNNQVGGYALAGSSANFEFKAGTDTKNGTATFNNDISLGRFVNLKVDAHTAYFKGIDTGNGGFNTLDFSGVTGKVNINKLITASTNVAVKNFNINELIVKTNGVSVGEYTHFSEDIGSQSRINTVRLETGTRSIFSGGVKFKSGEKLVIDEFYYSPWNYFDARNIKNVEITRKFASSTPENPWGTSKLMFNNLTLGQNAVMDYSQFSNLTIQGDFINNQGTINYLVRGGQVATLNVGNAAAMMFNNDIDSATGFYKPLIKINSAQDLIKNTEHVLLKAKIIGYGNVSTGTNGISNVNLEEQFKERLALYNNNNRMDTCVVRNTDD…
	2061	PRJNA329344	WP_097716442.1	>2061AG:TVVNIDRINTNADGTIRVGGYKASLTTNAAHLHIGKGGVNLSNQASGRSLLVENLTGNITVDGPLRVNNQVGGYALAGSSANFEFKAGTDTKNGTATFNNDISLGRFVNLKVDAHTANFKGIDTGNGGFNTLDFSGVTGKVNINKLITASTNVAVKNFNINELIVKTNGVSVGEYTHFSEDIGSQSRINTVRLETGTRSIFSGGVKFKGGEKLVIDEFYYSPWNYFDARNIKNVEITRKFASSTPENPWGTSKLMFNNLTLGQNAVMDYSQFSNLTIQGDFINNQGTINYLVRGGKVATLNVGNAAAMMFNNDIDSATGFYKPLMKINSAQDLIKNTEHVLLKAKIIGYGNVSTGTNGISNVNLEEQFKERLALYNNNNRMDTCVVRNTDD…
	2065	PRJNA329343	WP_097699977.1	>2065G:TVVNIDRINTKADGTIRVGGYKASLTTNAAHLHIGKGGVNLSNQASGRSLLVENLTGNITVDGALRVNNQVGGYALAGSSANFEFKAGTDTKNGTATFNNDISLGRFVNLKVDAHTANFKGIDTGNGGFNTLDFSGVTDKVNINKLITASTNVAAKNFNINELIVKTNGVSVGEYTHFSEDIGSQSRINTVRLETGTRSIFSGGVKFKSGEKLVINEFYYSPWNYFDARNVKNVEITRKFASSTPENPWGTSKLMFNNLTLGQNAVMDYSQFSNLTIQGDFINNQGTINYLVRGGKVATLNVGNAAAMMFNNDIDSATGFYKPLIKINSAQDLIKNTEHVLVKAKIIGYGNVSTGTNGISNVNLEEQFKERLALYNNNNRMDTCVVRNTDDI…
	3004	PRJNA329342	WP_097717579.1	>3004IM:TVVNIDRINTNADGTIRVGGYKASLTTNAAHLHIGKGGVNLSNQASGRSLLVENLTGNITVDGPLRVNNQVGGYALAGSSANFEFKAGTDTKNGTATFNNDISLGRFVNLKVDAHTANFKGIDTGNGGFNTLDFSGVTGKVNINKLITASTNVAVKNFNINELIVKTNGVSVGEYTHFSEDIGSQSRINTVRLETGTRSIFSGGVKFKSGEKLVIDEFYYSPWNYFDARNIKNVEITKKFASSTPENPWGTSKLMFNNLTLGQNAVMDYSQFSNLTIQGDFINNQGTINYLVRGGKVATLSVGNAAAMMFNNDIDSATGFYKPLIKINSAQDLIKNTEHVLLKAKIIGYGNVSTGTNGISNVNLEEQFKERLALYNNNNRMDTCVVRNTDD…
	3026	PRJNA329341	WP_097716154.1	>3026IM:TVVNIDRINTKADGTIKVGGYKASLTTNAAHLHIGKGGVNLSNQASGRTLLVENLTGNITVDGPLRVNNQVGGYALAGSSANFEFKAGTDTKNGTATFNNDISLGRFVNLKVDAHTANFKGIDTGNGGFNTLDFSGVTGKVNINKLITASTNVAVKNFNINELIVKTNGVSVGEYTHFSEDIGSQSRINTVRLETGTRSIFSGGVKFKSGEKLVIDEFYYSPWNYFDARNIKNVEITRKFASSTPENPWGTSKLMFNNLTLGQNAVMDYSQFSNLTIQGDFINNQGTINYLVRGGKVATLNVGNAAAMMFNNDIDSATGFYKPLIKINSAQDLIKNTEHVLLKAKIIGYGNVSTGTNSISNVNLEEQFKERLALYNNNNRMDTCVVRNTDD…
	3029	PRJNA329340	WP_097699347.1	>3029G:TVVNIDRINTNADGTIRVGGYKASLTTNAAHLHIGKGGVNLSNQASGRSLLVENLTGNITVDGPLRVNNQVGGYALAGSSANFEFKAGTDTKNGTATFNNDISLGRFVNLKVDAHTANFKGIDTGNGGFNTLDFSGVTGKVNINKLITASTNVAVKNFNINELIVKTNGVSVGEYTHFSEDIGSQSHINTVRLETGTRSIFSGGVKFKSGEKLVINEFYYSPWNYFDARNIKNVEITRKFASSTPENPWGTSKLMFNNLTLGQNAVMDYSQFSNLTIQGDFINNQGTINYLVRGGQVATLNVGNAAAMMFNNDIDSATGFYKPLIKINSAQDLIKNTEHVLLKAKIIGYGNVSTGTNGISNVNLEEQFKERLALYNNNNRMDTCVVRNTDDI…
	3033	PRJNA329338	WP_097713258.1	>3033G:TVVNIDRINTKADGTIRVGGYKASLTTNAAHLHIGKGGVNLSNQASGRSLLVENLTGNITVDGPLRVNNQVGGYALAGSSANFEFKAGTDTKNGTATFNNDISLGRFVNLKVDAHTANFKGIDTGNGGFNTLDFSGVTGKVNINKLITASTNVAAKNFNINELIVKTNGVSVGEYTHFSEDIGSQSRINTVRLETGTRSIYSGGVKFKGGEKLVINDFYYAPWNYFDARNIKNVEITNKLAFGPQGSPWGTSKLMFNNLTLGQNAVMDYSQFSNLTIQGDFINNQGTINYLVRGGQVATLNVGNAAAMMFNNDIDSATGFYKPLIKINSAQDLIKNTEHVLLKAKIIGYGNVSTGTNGISNVNLEEQFKERLALYNNNNRMDTCVVRNTDDI…
	3046	PRJNA329336	WP_097683364.1	>3046G:TVVNIDRINTNADGTIRVGGFKASLTTNAAHLHIGKGGVNLSNQASGRSLLVENLTGNITVDGPLRVNNQVGGYALAGSSANFEFKAGTDTKNGIATFNNDISLGRFVNLKVDAHTANFKGIDTGNGGFNTLDFSGVTDKVNINKLITASTNVAIKNFNINELIVKTNGVSVGEYTHFSEDIGSQSRINTVRLETGTRSIFSGGVKFKGGEKLVIDEFYYSPWNYFDARNIKNVEITRKFASSTPENPWGTSKLMFNNLTLGQNAVMDYSQFSNLTIQGDFINNQGTINYLVRGGQVATLNVGNAAAMMFNNDIDSATGFYKPLIKINSAQDLIKNTEHVLLKAKIIGYGNVSTGTNGISNVNLEEQFKERLALYNNNNRMDTCVVRNTDDI…
	3053	PRJNA329334	WP_097704451.1	>3053AG:TVVNIFHLNTKADGTLRAGGFKASLSTNAAHLNIGEGGVNLSNQASGRTLLVENLTGNITVEGTLRVNNQVGGAAVAGSSANFEFKAGEDTNNATATFNNDIHLGKAVNLRVDAHTANFNGNIYLGKSTNLRVNGHSAHFKNIDASKSDNGLNTSSLDFSGVTDKVNINKLTTSATNVNVKNFDIKELVVTTRVQSFGQYTIFGENIGDQSRIGVVSLQTGYSPAYSGGVTFKSGKKLVIDEIYHAPWNYFDARNITDVEVNKRILFGAPGNIAGKTGLMFNNLTLNSNASMDYGKDLDLTIQGNFTNNQGTMNLFVQNGRVATLNAGHQASMMFNNVVDSATGFYKPLIKINDAQNLTKNKEHVLVKARNIDYNLVGVQGASYDSISSSN…
	3056	PRJNA329333	WP_097682086.1	>3056AG:TVVNIDRINTNADGTIRVGGYKASLTTNAAHLHIGKGGVNLSNQASGRSLLVENLTGNITVDGPLRVNNQVGGYALAGSSANFEFKAGTDTKNGTATFNNDISLGRFVNLKVDAHTANFKGIDTGNGGFNTLDFSGVTGKVNINKLITASTNVAVKNFNINELIVKTNGVSVGEYTHFSEDIGSQSRINTVRLETGTRSIFSGGVKFKSGEKLVIDEFYYSPWNYFDARNIKNVEITKKFASSTPENPWGTSKLMFNNLTLGQNAVMDYSQFSNLTIQGDFINNQGTINYLVRGGKVATLSVGNAAAMMFNNDIDSATGFYKPLIKINSAQDLIKNTEHVLLKAKIIGYGNVSTGTNGISNVNLEEQFKERLALYNNNNRMDTCVVRNTDD…
	3076	PRJNA329331	WP_097696629.1	>3076AG:TVVNIFHLNTKADGTLKAGGFKASLSTNAAHLNIGEGGINLSNQASGRSLLVENLTGNITVEGTLRVNNQVGGAAVAGSSANFEFKAGEDTNNATATFNNDIHLGKAVNLRVDAHTANFNGNIYLGKSTNLRVNGHTAHFKNIDASKSDNGLNTSSLDFSGVTDKVNINKLTTSATNVNVKNFDIKELVVTTRVQSFGQYTIFGENIGDKSRIGVVSLQTGYSPAYSGGVTFKSGKKLVIDELYHAPWNYFDARNITDVEVNKRILFGAPGNIAGKTGLMFNNLTLNSNASMDYGKDLDLTIQRHFTNNQGTMNLFVQDGRVATLNAGHQASMIFNNLVDSATGFYKPLIKINNAQNLTKNKEHVLVKARNIDYNLVGVQGASYDSISSSN…
	3096	PRJNA329330	WP_097681390.1	>3096AG:TVVNIDRINTNADGTIRVGGFKASLTTNAAHLHIGKGGVNLSNQASGRSLLVENLTGNITVDGPLRVNNQVGGYALAGSSANFEFKAGTDTKNGTATFNNDISLGRFVNLKVDAHTANFKGIDTGNGGFNTLDFSGVTGKVNINKLITASTNVAVKNFNINELIVKTNGVSVGEYTHFSEDIGSQSRINTVRLETGTRSIFSGGVKFKSGEKLVIDEFYYSPWNYFDARNIKNVEITRKFASSTPENPWGTSKLMFNNLTLGQNAVMDYSQFSNLTIQGDFINNQGTINYLVRGGQVATLNVGNAAAMMFNNDIDSATGFYKPLIKINSAQDLIKNTEHVLLKAKIIGYGNVSTGTNGISNVNLEEQFKERLALYNNNNRMDTCVVRNTDD…
	3118	PRJNA329329	WP_097713258.1	>3118AG:TVVNIDRINTKADGTIRVGGYKASLTTNAAHLHIGKGGVNLSNQASGRSLLVENLTGNITVDGPLRVNNQVGGYALAGSSANFEFKAGTDTKNGTATFNNDISLGRFVNLKVDAHTANFKGIDTGNGGFNTLDFSGVTGKVNINKLITASTNVAAKNFNINELIVKTNGVSVGEYTHFSEDIGSQSRINTVRLETGTRSIYSGGVKFKGGEKLVINDFYYAPWNYFDARNIKNVEITNKLAFGPQGSPWGTSKLMFNNLTLGQNAVMDYSQFSNLTIQGDFINNQGTINYLVRGGQVATLNVGNAAAMMFNNDIDSATGFYKPLIKINSAQDLIKNTEHVLLKAKIIGYGNVSTGTNGISNVNLEEQFKERLALYNNNNRMDTCVVRNTDD…
	3120	PRJNA329328	WP_097705678.1	>3120AG:TVVNIDRINTNADGTIRVGGYKASLTTNAAHLHIGKGGVNLSNQASGRTLLVENLTGNITVDGPLRVNNQVGGYALAGSSANFEFKAGTDTKNGTATFNNDISLGRFVNLKVDAHTANFKGIDTGNGGFNTLDFSGVTGKVNINKLITASTNVAVKNFNINELIVKTNGVSVGEYTHFSENIGSQSRINTVRLETGTRSIFSGGVKFKGGEKLVIDEFYYSPWNYFDARNIKNVEITRKFASSTPENPWGTSKLMFNNLTLGQNAVMDYSQFSNLTIQGDFINNQGTINYLVRGGQVATLNVGNAAAMMFNNDIDSTTGFYKPLIKINSAQDLIKNTEHVLLKAKIIGYGNVSTGTNGISNVNLEEQFKERLALYNNNNRMDTCVVRNTDD…
	3125	PRJNA329327	WP_097722865.1	>3125AG:TVVNIDRINTKADGTIKVGGFKASLTTNAAHLNIGKGGVNLSNQASGRTLLVENLTGNITVDGPLRVNNQVGGYALAGSSANFEFKAGVDTKNGTATFNNDISLGRFVNLKVDAHTANFKGIDTGNGGFNTLDFSGVTGKVNINKLITASTNVAVKNFNINELIVKTNGISVGEYTHFSEDIGSQSRINTVRLETGTRSIFSGGVKFKSGEKLVIDEFYYSPWNYFDARNVKNVEITRKFASSTPENPWGTSKLMFNNLTLGQNAVMDYSQFSNLTIQGDFINNQGTINYLVRGGQVATLNVGNAAAMMFNNDIDSATGFYKPLIKINSAQDLIKNTEHVLLKAKIIGYGNVSTGTNGISNVNLEEQFKERLALYNNNNRMDTCVVRNTDD…
	3133	PRJNA329326	WP_097690062.1	>3133AG:TVVNIDRINTNADGTIRVGGFKASLTTNAAHLHIGKGGVNLSNQASGRSLLVENLTGNITVDGPLRVNNQVGGAALAGSSANFEFKAGTDTKNGTATFNNDIHLGKAVNLRVDAHTANFNGNIYLGKSTNLRVNGHSAHFKNIDASKSDNGLNTSALDFSGVTDKVNINKLTTSATNVNVKNFDIKELVVTTRVQSFGQYTIFGENIGDKSRIGVVSLQTGYSPAYSGGVTFKSGKKLVIDEIYHAPWNYFDARNVTDVEVNKRILFGAPGNIAGKTGLMFNNLTLNSNASMDYGKDLDLTIQRHFTNNQGTMNLFVQDGRVATLNAGHQASMIFNNLVDSATGFYKPLIKINNAQNLTKNKEHVLVKARNIDYNLVGVQGASYDNISASN…
	3136	PRJNA329325	WP_097688208.1	>3136G:TVVNIFHLNTKADGTLRAGGFKASLSTNAAHLNIGEGGVNLSNQASGRSLLVENLTGNITVEGTLRVNNQVGGAAVAGSSANFEFKAGEDTNNATATFNNDIHLGKAVNLRVDAHTAYFNGNIYLGKSTNLRVNGHSAHFKNIDASKSDNGLNTSSLDFSGVTDKVNINKLTTSATNVNVKNFDIKELVVTTRVQSFGQYTIFGENIGDKSRIGVVSLQTGYSPAYSGGVTFKSGKKLVIDEIYHAPWNYFDARNVTDVEINKRILFGAPGNIAGKTGLMFNNLTLNSNASMDYGKDLDLTIQGHFTNNQGTMNLFVQDGRVATLNAGHQASMMFNNVVDSATGFYKPLIKINNAQNLTKNKEHVLVRARNIDYNLVGVQGASYDNISASNT…
	22003	PRJNA329324	WP_097723982.1	>22003IM:TVVNINRINTNADGTIRVGGYKASLTTNAAHLHIGKGGINLSNQASGRSLLVENLTGNITVDGPLRVNNQVGGYALAGSSANFEFKAGTDTKNGTATFNYDISLGRFVNLKVDAHTANFKGIDTGNGGFNTLDFSGVTDKVNINKLITASTNVAVKNFNINELIVKTNGISVGEYTHFSEDIGSQSRINTVRLETGTRSIFSGGVKFKSGEKLVIDEFYYSPWNYFDARNVKNVEITRKFASSTPENPWGTSKLMFNNLTLGQNAVMDYSQFSNLTIQGDFINNQGTINYLVRGGKVATLNVGNAAAMMFNNDIDSATGFYKPLIKINSAQDLIKNTEHVLLKAKIIGYGNVSTGTNGISNVNLEEQFKERLALYNNNNRMDTCVVRNTD…
	22013	PRJNA329323	WP_097722386.1	>22013AG:TVVNIDRINTNADGTIRVGGFKASLTTNAAHLHIGKGGVNLSNQASGRSLLVENLTGNITVDGPLRVNNQVGGAALAGSSANFEFKAGTDTKNGTATFNNDISLGRFVNLKVDAHTANFKGIDTGNGGFNTLDFSGVTGKVNINKLITASTNVAVKNFNINELIVKTNGVSVGEYTHFSEDIGSQSRINTVRLETGTRSIFSGGVKFKSGEKLVIDEFYYSPWNYFDARNIKNVEITRKFASSTPENPWGTSKLMFNNLTLGQNAVMDYSQFSNLTIQGDFINNQGTINYLVRGGQVATLNAGHQASMIFNNVVDSATGFYKPLIKINNAQNLTKNKEHVLVKARNIDYNLVGVQGASYDNISASNTNLQESFKERLALYNNNNRMDICV…
	22019	PRJNA329322	WP_078251020.1	>22019AG:TVVNINRINTNADGTIRVGGYKASLTTNAAHLHIGKGGVNLSNQASGRSLLVENLTGNITVDGPLRVNNQVGGYALAGSSANFEFKAGTDTKNGTATFNNDISLGRFVNLKVDAHTANFKGIDTGNGGFNTLDFSGVTGKVNINKLITASTNVAVKNFNINELIVKTNGVSVGEYTHFSEDIGSQSRINTVRLETGTRSIFSGGVKFKGGEKLVIDEFYYSPWNYFDARNIKNVEITKKFASSTPENPWGTSKLMFNNLTLGQNAVMDYSQFSNLTIQGDFINNQGTINYLVRGGKVATLSVGNAAAMMFNNDIDSATGFYKPLIKINSAQDLIKNTEHVLLKAKIIGYGNVSTGTNGISNVNLEEQFKERLALYNNNNRMDTCVVRNTD…
	22020	PRJNA329320	WP_078242373.1	>22020IM:TVVNIFHLNTKADGTIRAGGFKASLSTNAAHLNIGEGGVNLSNQASGRSLLVENLTGNITVEGTLRVNNQVGGAAVAGSSANFEFKAGEDTNNATATFNNDIHLGKAVNLRVDAHTAYFNGNVYLGKSTNLRVNGHSAHFKNIDASKSDNGLNTSALDFSGVTDKVNINKLTTSATNVNVKNFDIKELVVTTRVQSFGQYTIFGENIGDKSRIGVVSLQTGYSPAYSGGVTFKSGKKLVIDEIYHAPWNYFDARNVTDVEINKRILFGAPGNIAGKTGLMFNNLTLNSNASMDYGKDLDLTIQGHFTNNQGTMNLFVQDGRVATLNAGHQASMIFNNLVDSATGFYKPLIKINNAQNLTKNKEHVLVKARNIDYNLVGVQGTSYDNISAS…
	22021	PRJNA329319	WP_078250007.1	>22021G:TVVNIDRINTNADGTIRVGGYKASLTTNAAHLHIGKGGVNLSNQASGRSLLVENLTGNITVDGPLRVNNQVGGYALAGSSANFEFKAGTDTKNGTATFNNDISLGRFVNLKVDAHTANFKGIDTGNGGFNTLDFSGVTGKVNINKLITASTNVAVKNFNINELIVKTNGVSVGEYTHFSEDIGSQSRINTVRLETGTRSIFSGGVKFKSGEKLVIDEFYYSPWNYFDARNIKNVEITRKFASSTPENPWGTSKLMFNNLTLGQNAVMDYSQFSNLTIQGDFINNQGTINYLVRGGQVATLNVGNAAAMMFNNDIDSATGFYKPLIKINSAQDLIKNTEHVLLKAKIIGYGNVSTGTNGISNVNLEEQFKERLALYNNNNRMDTCVVRNTDD…
	22023	PRJNA329317	WP_078216937.1	>22023G:TVVNIFHLNTKADGTLRAGGFKASLSTNAAHLNIGEGGINLSNQASGRTLLVENLTGNITVEGTLRVNNQVGGAAVAGSSANFEFKAGEDTNNATATFNNDIHLGKAVNLRVDAHTAYFNGNIYLGKSTNLRVNGHSAHFKNIDASKSDNGLNTSALDFSGVTDKVNINKLTTSATNVNVKNFDIKELVVTTRVQSFGQYTIFGENIGDKSRIGVVSLQTGYSPAYSGGVTFKSGKNLVIDEIYHAPWNYFDARNVTDVEINKRILFGAPGNIAGKTGLMFNNLTLNSNASMDYGKDLDLTIQRHFTNNQGTMNLFVQDGRVATLNAGHQASMIFNNVVDSATGFYKPLIKINNAQNLTKNKEHVLVKARNIDYNLVGVQGASYDNISASN…
	22046	PRJNA329314	WP_078297132.1	>22046G:TVVNIDRINTNADGTIRVGGYKASLTTNAAHLHIGKGGVNLSNQASGRSLLVENLTGNITVDGPLRVNNQVGGYALAGSSANFEFKAGTDTKNGTATFNNDISLGRFVNLKVDAHTANFKGIDTGNGGFNTLDFSGVTGKVNINKLITASTNVAVKNFNINELIVKTNGVSVGEYTHFSEDIGSQSHINTVRLETGTRSIFSGGVKFKGGEKLVINEFYYSPWNYFDARNIKNVEITKKFASSTPENPWGTSKLMFNNLTLGQNAVMDYSQFSNLTIQGDFINNQGTINYLVRGGKVATLSVGNAAAMMFNNDIDSATGFYKPLIKINSAQDLIKNTEHVLLKAKIIGYGNVSTGTNGISNVNLEEQFKERLALYNNNNRMDTCVVRNTDD…
	22087	PRJNA329313	WP_078294889.1	>22087G:TVVNINRINTNADGTIRVGGYKASLTTNAAHLNIGKGGVNLSNQASGRTLLVENLTGNITVDGPLRVNNQVGGYALAGSSANFEFKAGTDTKNGTATFNNDISLGRFVNLRVDAHTANFKGIDTGNGGFNTLDFSGVTGKVNINKLITASTNVAVKNFNINELIVKTNGVSVGEYTHFSEDIGSQSRINTVRLETGTRSIFSGGVKFKSGEKLVINEFYYSPWNYFDARNIKNVEITRKFASSTPENPWGTSKLMFNNLTLGQNAVMDYSQFSNLTIQGDFINNQGTINYLVRGGQVATLNVGNAAAMMFNNDIDSATGFYKPLIKINSAQDLIKNTEHVLLKAKIIGYGNVSTGTNGISNVNLEEQFKERLALYNNNNRMDTCVVRNTDD…
	22093	PRJNA329311	WP_033585620.1	>22093AG:TVVNINRINTNADGTIRVGGYKASLTTNAAHLHIGKGGINLSNQASGRSLLVENLTGNITVDGPLRVNNQVGGYALAGSSANFEFKAGTDTKNGTATFNNDISLGRFVNLKVDAHTANFKGIDTGNGGFNTLDFSGVTDKVNINKLITASTNVAVKNFNINELIVKTNGVSVGEYTHFSEDIGSQSHINTVRLETGTRSIFSGGVKFKSGEKLVIDEFYYSPWNYFDARNVKNVEITRKFASSTPENPWGTSKLMFNNLTLGQNAVMDYSQFSNLTIQGDFINNQGTINYLVRGGKVATLNVGNAAAMMFNNDIDSTTGFYKPLIKINSAQDLIKNTEHVLLKAKIIGYGNVSTGTNGISNVNLEEQFKERLALYNNNNRMDTCVVRNTD…
	22095	PRJNA329310	WP_078268579.1	>22095AG:TVVNIDRINTNADGTIKVGGFKASLTTNAAHLHIGKGGVNLSNQASGRSLLVENLTGNITVDGPLRVNNQVGGYALAGSSANFEFKAGTDTKNGTATFNNDISLGRFVNLKVDAHTANFKGIDTGNGGFNTLDFSGVTGKVNINKLITASTNVAVKNFNINELIVKTNGVSVGEYTHFSEDIGSQSRINTVRLETGTRSIFSGGVKFKGGEKLVIDEFYYSPWNYFDARNIKNVEITRKFASSTPENPWGTSKLMFNNLTLGQNAVMDYSQFSNLTIQGDFINNQGTINYLVRGGQVATLNVGNAAAMMFNNDIDSATGFYKPLIKINSAQDLIKNTEHVLLKAKIIGYGNVSTGTNGISNVNLEEQFKERLALYNNNNRMDTCVVRNTD…
	22151	PRJNA329308	WP_097711231.1	>22151AG:TVVNIDRINTKADGTIKVGGFKASLTTNAAHLHIGKGGVNLSNQASGRTLLVENLTGNITVNGALRVNNQVGGYALAGSSANFEFKAGTDTKNGTATFNNDISLGRFVNLKVDAHTANFKGIDTGNGGFNTLDFSGVTGKVNINKLITASTNVAVKNFNINELIVKTNGVSVGEYTHFSEDIGSQSRINTVRLETGTRSIFSGGVKFKGGEKLVIDEFYYSPWNYFDARNIKNVEITKKFASSTPENPWGTSKLMFNNLTLGQNAVMDYSQFSNLTIQGDFINNQGTINYLVRGGKVATLSVGNAAAMMFNNDIDSATGFYKPLIKINSAQDLIKNTEHVLLKAKIIGYGNVSTGTNGISNVNLEEQFKERLALYNNNNRMDTCVVRNTD…
	22211	PRJNA329307	WP_097712049.1	>22211AG:TVVNINRINTNADGTIRVGGYKASLTTNAAHLHIGKGGVNLSNQASGRSLLVENLTGNITVEGTLRVNNQVGGAAVAGSSANFEFKAGEDTNNATATFNNDIHLGKAVNLRVDAHTAYFNGNIYLGKSTNLRVNGHSAHFKNIDASKSDNGLNTSALDFSGVTDKVNINKLTTSATNVNVKNFDIKELVVTTRVQSFGQYTIFGENIGDKSRIGVVSLQTGYSPAYSGGVTFKSGKKLVIDEIYHAPWNYFDARNVTDVEINKRILFGAPGNIAGKTGLMFNNLTLNSNASMDYGKDLDLTIQGHFTNNQGTMNLFVQDGRVATLNAGHQASMIFNNLVDSATGFYKPLIKINNAQNLTKNKEHVLVKARNIDYNLVGVQGASYDNISAS…
	22278	PRJNA329306	WP_097568408.1	>22278G:TVVNINRINTNADGTIRVGGYKASLTTNAAHLHIGKGGINLSNQASGRSLLVENLTGNITVDGPLRVNNQVGGYALAGSSANFEFKAGTDTKNGTATFNNDISLGRFVNLKVDAHTANFKGIDTGNGGFNTLDFSGVTGKVNINKLITASTNVAVKNFNINELIVKTNGVSVGEYTHFSENIGSQSRINTVRLETGTRSIFSGGVKFKGGEKLVIDEFYYSPWNYFDARNIKNVEITRKFASSTPENPWGTSKLMFNNLTLGQNAVMDYSQFSNLTIQGDFINNQGTINYLVRGGQVATLNVGNAAAMMFNNDIDSTTGFYKPLIKINSAQDLIKNTEHVLLKAKIIGYGNVSTGTNGISNVNLEEQFKERLALYNNNNRMDTCVVRNTDD…
	22308	PRJNA329304	WP_097695813.1	>22308AG:TVVNINRINTNADGTIRVGGYKASLTTNAAHLHIGKGGINLSNQASGRTLLVENLTGNITVDGPLRVNNQVGGYALAGSSANFEFKAGTDTKNGTATFNNDISLGRFVNLKVDAHTANFKGIDTGNGGFNTLDFSGVTGKVNINKLITASTNVAVKNFNINELIVKTNGVSVGEYTHFSEDIGSQSRINTVRLETGTRSIFSGGVKFKSGEKLVIDEFYYSPWNYFDARNIKNVEITRKFASSTPENPWGTSKLMFNNLTLGQNAVMDYSQFSNLTIQGDFINNQGTINYLVRGGQVATLNVGNAAAMMFNNDIDSATGFYKPLIKINSAQDLIKNTEHVLLKAKIIGYGNVSTGTNGISNVNLEEQFKERLALYNNNNRMDTCVVRNTD…
	22311	PRJNA329302	WP_078259997.1	>22311AG:TVVNIDRINTNADGTIRVGGFKASLTTNAAHLHIGKGGVNLSNQASGRSLLVENLTGNITVDGPLRVNNQVGGAALAGSSANFEFKAGTDTKNGTATFNNDISLGRFVNLKVDAHTANFKGIDTGNGGFNTLDFSGVTGKVNINKLITASTNVAVKNFNINELIVKTNGVSVGEYTHFSEDIGSQSRINTVRLETGTRSIFSGGVKFKSGEKLVIDEFYYSPWNYFDARNIKNVEITRKFASSTPENPWGTSKLMFNNLTLGQNAVMDYSQFSNLTIQGDFINNQGTINYLVRGGQVATLNVGNAAAMMFNNDIDSATGFYKPLIKINSAQDLIKNTEHVLLKAKIIGYGNVSTGTNGISNVNLEEQFKERLALYNNNNRMDTCVVRNTD…
	22312	PRJNA329294	WP_078241263.1	>22312IM:TVVNINRINTNADGTIRVGGYKASLTTNAAHLNIGKGGVNLSNQASGRTLLVENLTGNITVDGPLRVNNQVGGYALAGSSANFEFKAGTDTNNATATFNNDISLGRFVNLRVDAHTANFKGIDTGNGGFNTLDFSGVTGKVNINKLITASTNVAVKNFNINELIVKTNGVSVGEYTHFSEDIGSQSRINTVRLETGTRSIFSGGVKFKSGEKLVIDEFYYSPWNYFDARNIKNVEITRKFASSTPENPWGTSKLMFNNLTLGQNAVMDYSQFSNLTIQGDFINNQGTINYLVRGGQVATLNVGNAAAMMFNNDIDSATGFYKPLIKINSAQDLIKNTEHVLLKAKIIGYGNVSTGTNGISNVNLEEQFKERLALYNNNNRMDTCVVRNTD…
	22315	PRJNA329293	WP_097685925.1	>22315AG:TVVNIDRINTNADGTIKVGGFKASLTTNAAHLHIGKGGVNLSNQASGRTLLVENLTGNITVDGPLRVNNQVGGAALAGSSANFEFKAGTDTKNGTATFNNDISLGRFVNLKVDAHTANFKGIDTGNGGFNTLDFSGVTGKVNINKLITASTNVAVKNFNINELIVKTNGVSVGEYTHFSEDIGSQSRINTVRLETGTRSIFSGGVKFKSGEKLVIDEFYYSPWNYFDARNIKNVEITKKFASSTPENPWGTSKLMFNNLTLGQNAVMDYSQFSNLTIQGDFINNQGTINYLVRGGKVATLNVGNAAAMMFNNDIDSATGFYKPLIKINSAQDLIKNTEHVLLKAKIIGYGNVSTGTNGISNVNLEEQFKERLALYNNNNRMDTCVVRNTD…
	22317	PRJNA329289	WP_097684892.1	>22317G:TVVNIDRINTNADGTIRVGGYKASLTTNAAHLHIGKGGVNLSNQASGRSLLVENLTGNITVDGPLRVNNQVGGYALAGSSANFEFKAGTDTKNGTATFNNDISLGRFVNLKVDAHTANFKGIDTGNGGFNTLDFNGVTGKVNINKLITASTNVAVKNFNINELIVKTNGVSVGEYTHFSENIGSQSRINTVRLETGTRSIFSGGVKFKGGEKLVIDEFYYSPWNYFDARNIKNVEITRKFASSTPENPWGTSKLMFNNLTLGQNAVMDYSQFSNLTIQGDFINNQGTINYLVRGGQVATLNVGNAAAMMFNNDIDSTTGFYKPLIKINSAQDLIKNTEHVLLKAKIIGYGNVSTGTNGISNVNLEEQFKERLALYNNNNRMDTCVVRNTDD…
	22322	PRJNA329288	WP_078258293.1	>22322AG:TVVNIDRINTNADGTIRVGGYKASLTTNAAHLHIGKGGINLSNQASGRSLLVENLTGNITVDGPLRVNNQVGGYALAGSSANFEFKAGTDTKNGTATFNNDISLGRFVNLKVDAHTANFKGIDTGNGGFNTLDFSGVTGKVNINKLITASTNVAVKNFNINELIVKTNGVSVGEYTHFSEDIGSQSRINTVRLETGTRSIFSGGVKFKSGEKLVIDEFYYSPWNYFDARNIKNVEITRKFASSTPENPWGTSKLMFNNLTLGQNAVMDYSQFSNLTIQGDFINNQGTINYLVRGGQVATLNVGNAAAMMFNNDIDSATGFYKPLIKINSAQDLIKNTEHVLLKAKIIGYGNVSTGTNGISNVNLEEQFKERLALYNNNNRMDTCVVRNTD…
	22327	PRJNA329287	WP_078215600.1	>22327IM:TVVNIFHLNTKADGTLRAGGFKASLSTNAAHLHIGEGGVNLSNQASGRTLLVENLTGNITVEGTLRVNNQVGGAAVAGSSANFEFKAGEDTNNATATFNNDIHLGKAVNLRVDAHTAYFNGNIYLGKSTNLRVNGHSAHFKNIDASKSDNGLNTSALDFSGVTDKVNINKLTTSATNVNVKNFDIKELVVTTRVQSFGQYTIFGENIGDKSRIGVVSLQTGYSPAYSGGVTFKSGKKLVIDELYHAPWNYFDARNVTDVEINKRILFGAPGNIAGKTGLMFNNLTLNSNASMDYGKDLDLTIQRHFTNNQGTMNLFVQDGRVATLNAGHQASMIFNNLVDSATGFYKPLIKINNAQNLTKNKEHVLVRARNIDYNLVGVQGASYDNISAS…
	22331	PRJNA329286	WP_078286924.1	>22331IM:TVVNIDRINTKADGTIKVGGFKASLTTNAAHLHIGKGGVNLSNQASGRTLLVENLTGNITVDGPLRVNNQVGGYALAGSSANFEFKAGTDTKNGTATFNNDISLGRFVNLKVDAHTANFKGIDTGNGGFNTLDFSGVTGKVNINKLITASTNVAVKNFNINELIVKTNGVSVGEYTHFSENIGSQSRINTVRLETGTRSIFSGGVKFKGGEKLVIDEFYYSPWNYFDARNIKNVEITRKFASSTPENPWGTSKLMFNNLTLGQNAVMDYSQFSNLTIQGDFINNQGTINYLVRGGKVATLNVGNAAAMMFNNDIDSATGFYKPLIKINSAQDLIKNTEHVLLKAKIIGYGNVSTGTNGISNVNLEEQFKERLALYNNNNRMDTCVVRNTD…
	22335	PRJNA329285	WP_078279179.1	>22335IM:TVVNIDHINTNADGTIRVGGFKASLTTNAAHLHIGKGGVNLSNQASGRSLLVENLTGNITVDGPLRVNNQVGGAALAGSSANFEFKAGTDTKNGTATFNNDISLGRFVNLKVDAHTANFKGIDTGNGGFNTLDFSGVTGKVNINKLITASTNVAVKNFNINELIVKTNGVSVGEYTHFSEDIGSQSRINTVRLETGTRSIFSGGVKFKSGEKLVIDEFYYSPWNYFDARNIKNVEITRKFASSTPENPWGTSKLMFNNLTLGQNAVMDYSQFSNLTIQGDFINNQGTINYLVRGGKVATLSVGNAAAMMFNNDIDSATGFYKPLIKINSAQDLIKNTEHVLLKAKIIGYGNVSTGTNGISNVNLEEQFKERLALYNNNNRMDTCVVRNTD…
	22336	PRJNA329284	WP_078279179.1	>22336AG:TVVNIDRINTNADGTIRVGGYKASLTTNAAHLHIGKGGINLSNQASGRSLLVENLTGNITVDGPLRVNNQVGGYALAGSSANFEFKAGTDTKNGTATFNNDISLGRFVNLKVDAHTANFKGIDTGNGGFNTLDFSGVTGKVNINKLITASTNVAVKNFNINELIVKTNGVSVGEYTHFSENIGSQSRINTVRLETGTRSIFSGGVKFKGGEKLVIDEFYYSPWNYFDARNIKNVEITRKFASSTPENPWGTSKLMFNNLTLGQNAVMDYSQFSNLTIQGDFINNQGTINYLVRGGQVATLNVGNAAAMMFNNDIDSTTGFYKPLIKINSAQDLIKNTEHVLLKAKIIGYGNVSTGTNGISNVNLEEQFKERLALYNNNNRMDTCVVRNTD…
	22341	PRJNA329278	WP_078257043.1	>22341G:TVVNINRINTNADGTIRVGGYKASLTTNAAHLHIGKGGVNLSNQASGRSLLVENLTGNITVDGALRVNNQVGGYALAGSSANFEFKAGTDTKNGTATFNNDISLGRFVNLKVDAHTANFKGIDTGNGGFNTLDFSGVTDKVNINKLITASTNVAAKNFNINELIVKTNGVSVGEYTYFSEDIGSQSRINTVRLETGTRSIYSGGVKFKGGEKLVINDFYYAPWNYFDARNIKNVEITNKLAFGPQGSPWGTSKLMFNNLTLGQNAVMDYSQFSNLTIQGDFINNQGTINYLVRGGQVATLNVGNAAAMMFNNDIDSATGFYKPLIKINSAQDLIKNTEHVLLKAKIIGYGNVSTGTNGISNVNLEEQFKERLALYNNNNRMDTCVVRNTDD…
	22346	PRJNA329276	WP_078243497.1	>22346IM:TVVNIDRINTKADGTIKVGGFKASLTTNAAHLHIGKGGVNLSNQASGRTLLVENLTGNITVDGPLRVNNQVGGYALAGSSANFEFKAGTDTKNGTATFNNDISLGRFVNLKVDAHTANFKGIDTGNGGFNTLDFSGVTGKVNINKLITASTNVAVKNFNINELIVKTNGVSVGEYTHFSENIGSQSRINTVRLETGTRSIFSGGVKFKGGEKLVIDEFYYSPWNYFDARNIKNVEITRKFASSTPENPWGTSKLMFNNLTLGQNAVMDYSQFSNLTIQGDFINNQGTINYLVRGGQVATLNVGNAAAMMFNNDIDSATGFYKPLIKINSAQDLIKNTEHVLLKAKIIGYGNVSTGTNGISNVNLEEQFKERLALYNNNNRMDTCVVRNTD…
	22347	PRJNA329274	WP_097548513.1	>22347G:TVVNINRINTNADGTIRVGGYKASLTTNAAHLHIGKGGVNLSNQASGRSLLVENLTGNITVDGPLRVNNQVGGAALAGSSANFEFKAGTDTKNGTATFNNDISLGRFVNLKVDAHTANFKGIDTGNGGFNTLDFSGVTGKVNINKLITASTNVAVKNFNINELIVKTNGVSVGEYTHFSEDIGSQSRINTVRLETGTRSIFSGGVKFKGGEKLVIDEFYYSPWNYFDARNIKNVEITRKFASSTPENPWGTSKLMFNNLTLGQNAVMDYSQFSNLTIQGDFINNQGTINYLVRGGKVATLNVGNAAAMMFNNDIDSATGFYKPLIKINSAQDLIKNTEHVLVKAKIIGYGNVSTGTNGISNVNLEEQFKERLALYNNNNRMDTCVVRNTDD…
	22351	PRJNA329272	WP_097698072.1	>22351G:TVVNIDRINTNADGTIRVGGYKASLTTNAAHLHIGKGGVNLSNQASGRTLLVENLTGNITVDGPLRVNNQVGGYALAGSSANFEFKAGTDTKNGTATFNNDISLGRFVNLRVDAHTANFKGIDTGNGGFNTLDFSGVTGKVNINKLITASTNVAVKNFNINELIVKTNGVSVGEYTHFSEDIGSQSRINTVRLETGTRSIFSGGVKFKSGEKLVINEFYYSPWNYFDARNIKNVEITRKFASSTPENPWGTSKLMFNNLTLGQNAVMDYSQFSNLTIQGDFINNQGTINYLVRGGQVATLNVGNAAAMMFNNDIDSATGFYKPLIKINSAQDLIKNTEHVLLKAKIIGYGNVSTGTNGISNVNLEEQFKERLALYNNNNRMDTCVVRNTDD…
	22352	PRJNA329270	WP_097640207.1	>22352IM:TVVNIDRINTNADGTIRVGGYKASLTTNAAHLHIGKGGINLSNQASGRSLLVENLTGNITVDGPLRVNNQVGGYALAGSSANFEFKAGTDTKNGTATFNNDISLGRFVNLKVDAHTANFKGIDTGNGGFNTLDFSGVTGKVNINKLITASTNVAVKNFNINELIVKTNGVSVGEYTHFSENIGSQSRINTVRLETGTRSIFSGGVKFKGGEKLVIDEFYYSPWNYFDARNIKNVEITRKFASSTPENPWGTSKLMFNNLTLGQNAVMDYSQFSNLTIQGDFINNQGTINYLVRGGQVATLNVGNAAAMMFNNDIDSATGFYKPLMKINSAQDLIKNTEHVLLKAKIIGYGNVSTGTNGISNVNLEEQFKERLALYNNNNRMDTCVVRNTD…
	22360	PRJNA329269	WP_078263449.1	>22360AG:TVVNIDRINTNADGTIRVGGFKASLTTNAAHLHIGKGGINLSNQASGRSLLVENLTGNITVEGTLRVNNQVGGAAVAGSSANFEFKAGEDTNNATATFNNDIHLGKAVNLRVDAHTAYFNGNIYLGKSTNLRVNGHSAHFKNIDASKSDNGLNTSALDFSGVTDKVNINKLTTSATNVNIKNFDIKELVVTTRVQSFGQYTIFGENIGDKSRIGVVSLQTGYSPAYSGGVTFKSGKKLVIDEIYHAPWNYFDARNITDVEVNKRILFGAPGNIAGKTGLMFNNLTLNSNASMDYGKDLDLTIQGHFTNNQGTMNLFVQDGRVATLNAGHQASMIFNNLVDSATGFYKPLIKINNAQNLTKNKEHVLVKARNIDYNLVGVQGASYDNISAS…
	22362	PRJNA329268	WP_078283518.1	>22362G:TVVNIDRINTNADGTIRVGGYKASLTTNAAHLHIGKGGINLSNQASGRSLLVENLTGNITVDGPLRVNNQVGGYALAGSSANFEFKAGTDTKNGTATFNNDISLGRFVNLKVDAHTANFKGIDTGNGGFNTLDFSGVTGKVNINKLITASTNVAVKNFNINELIVKTNGVSVGEYTHFSENIGSQSRINTVRLETGTRSIFSGGVKFKGGEKLVIDEFYYSPWNYFDARNIKNVEITRKFASSTPENPWGTSKLMFNNLTLGQNAVMDYSQFSNLTIQGDFINNQGTINYLVRGGQVATLNVGNAAAMMFNNDIDSATGFYKPLMKINSAQDLIKNTEHVLLKAKIIGYGNVSTGTNGISNVNLEEQFKERLALYNNNNRMDTCVVRNTDD…
	22366	PRJNA329266	WP_078291006.1	>22366G:TVVNINRINTNADGTIRVGGYKASLTTNAAHLHIGKGGINLSNQASGRSLLVENLTGNITVEGTLRVNNQVGGAAVAGSSANFEFKAGEDTNNATATFNNDIHLGKAVNLRVDAHTAYFNGNIYLGKSTNLRVNGHSAHFKNIDASKSDNGLNTSALDFSGVTDKVNINKLTTSATNVNVKNFDIKELVVTTRVQSFGQYTIFGENIGDKSRIGVVSLQTGYSPAYSGVTFKSGKKLVIDEIYHAPWNYFDARNVTDVEINKRILFGAPGNIAGKTGLMFNNLTLNSNASMDYGKDLDLTIQGHFTNNQGTMNLFVQDGRVATLNAGHQASMIFNNLVDSATGFYKPLIKVNNAQNLTKNKEHVLVKARNIDYNLVGVQGASYDNISASNT…
	22367	PRJNA329263	WP_078260536.1	>22367IM:TVVNIDRINTKADGTIKVGGFKASLTTNAAHLHIGKGGVNLSNQASGRTLLVENLTGNITVDGPLRVNNQVGGYALAGSSANFEFKAGTDTKNGTATFNNDISLGRFVNLKVDAHTANFKGIDTGNGGFNTLDFSGVTGKVNINKLITASTNVAVKNFNINELIVKTNGVSVGEYTHFSENIGSQSRINTVRLETGTRSIFSGGVKFKGGEKLVIDEFYYSPWNYFDARNIKNVEITRKFASSTPENPWGTSKLMFNNLTLGQNAVMDYSQFSNLTIQGDFINNQGTINYLVRGGQVATLNVGNAAAMMFNNDIDSTTGFYKPLIKINSAQDLIKNTEHVLLKAKIIGYGNVSTGTNGISNVNLEEQFKERLALYNNNNRMDTCVVRNTD…
	22368	PRJNA329262	WP_078272171.1	>22368G:TVVNIDRINTKADGTIKVGGFKASLTTNAAHLHIGKGGVNLSNQASGRTLLVENLTGNITVDGPLRVNNQVGGYALAGSSANFEFKAGTDTKNGTATFNNDISLGRFVNLKVDAHTANFKGIDTGNGGFNTLDFSGVTGKVNINKLITASTNVAVKNFNINELIVKTNGVSVGEYTHFSEDIGSQSRINTVRLETGTRSIFSGGVKFKSGEKLVIDEFYYSPWNYFDARNIKNVEITRKFASSTPENPWGTSKLMFNNLTLGQNAVMDYSQFSNLTIQGDFINNQGTINYLVRGGQVATLNVGNAAAMMFNNDIDSATGFYKPLIKINSAQDLIKNTEHVLLKAKIIGYGNVSTGTNGISNVNLEEQFKERLALYNNNNRMDTCVVRNTDD…
	22370	PRJNA329261	WP_078293636.1	>22370G:TVVNIDRINTKADGTIKVGGFKASLTTNAAHLHIGKGGVNLSNQASGRTLLVENLTGNITVDGPLRVNNQVGGYALAGSSANFEFKAGTDTKNGTATFNNDISLGRFVNLKVDAHTANFKGIDTGNGGFNTLDFSGVTGKVNINKLITASTNVAVKNFNINELIVKTNGVSVGEYTHFSENIGSQSRINTVRLETGTRSIFSGGVKFKGGEKLVIDEFYYSPWNYFDARNIKNVEITRKFASSTPENPWGTSKLMFNNLTLGQNAVMDYSQFSNLTIQGDFINNQGTINYLVRGGQVATLNVGNAAAMMFNNDIDSATGFYKPLIKINSAQDLIKNTEHVLLKAKIIGYGNVSTGTNGISNVNLEEQFKERLALYNNNNRMDTCVVRNTDD…
	22371	PRJNA329259	WP_078261252.1	>22371G:TVVNIDRINTKADGTIKVGGYKASLTTNAAHLNIGKGGVNLSNQASGRTLLVENLTGNITVDGPLRVNNQVGGYALAGSSANFEFKAGVDTKNGTATFNNDISLGRFVNLKVDAHTANFKGIDTGNGGFNTLDFSGVTGKVNINKLITASTNVAVKNFNINELIVKTNGISVGEYTHFSEDIGSQSRINTVRLETGTRSIFSGGVKFKSGEKLVIDEFYYSPWNYFDARNVKNVEITRKFASSTPENPWGTSKLMFNNLTLGQNAVMDYSQFSNLTIQGDFINNQGTINYLVRGGQVATLNVGNAAAMMFNNDIDSATGFYKPLIKINSAQDLIKNTEHVLLKAKIIGYGNVSTGTNGISNVNLEEQFKERLALYNNNNRMDTCVVRNTDD…
	22377	PRJNA329258	WP_097694518.1	>22377G:TVVNIDRINTNADGTIRVGGYKASLTTNAAHLHIGKGGVNLSNQASGRSLLVENLTGNITVDGPLRVNNQVGGYALAGSSANFEFKAGTDTKNGTATFNNDISLGRFVNLKVDAHTANFKGIDTGNGGFNTLDFSGVTGKVNINKLITASTNVAVKNFNINELIVKTNGVSVGEYTHFSEDIGSQSRINTVRLETGTRSIFSGGVKFKSGEKLVIDEFYYSPWNYFDARNIKNVEITRKFASSTPENPWGTSKLMFNNLTLGQNAVMDYSQFSNLTIQGDFINNQGTINYLVRGGQVATLNVGNAAAMMFNNDIDSATGFYKPLIKINSAQDLIKNTEHVLLKAKIIGYGNVSTGTNGISNVNLEEQFKERLALYNNNNRMDTCVVRNTDD…
	22378	PRJNA329253	WP_078248858.1	>22378G:TVVNINRINTNADGTIRVGGYKASLTTNAAHLHIGKGGINLSNQASGRSLLVENLTGNITVDGPLRVNNQVGGYALAGSSANFEFKAGTDTKNGTATFNNDISLGRFVNLKVDAHTANFKGIDTGNGGFNTLDFSGVTGKVNINKLITASTNVAVKNFNINELIVKTNGVSVGEYTHFSEDIGSQSRINTVRLETGTRSIFSGGVKFKSGEKLVIDEFYYSPWNYFDARNIKNVEITRKFASSTPENPWGTSKLMFNNLTLGQNAVMDYSQFSNLTIQGDFINNQGTINYLVRGGQVATLNVGNAAAMMFNNDIDSATGFYKPLIKINSAQDLIKNTEHVLLKAKIIGYGNVSTGTNGISNVNLEEQFKERLALYNNNNRMDTCVVRNTDD…
	22385	PRJNA329252	WP_078270647.1	>22385G:TVVNIDRINTNADGTIRVGGFKASLTTNAAHLHIGKGGVNLSNQASGRSLLVENLTGNITVDGPLRVNNQVGGAALAGSSANFEFKAGTDTKNGTATFNNDISLGRFVNLKVDAHTANFKGIDTGNGGFNTLDFSGVTGKVNINKLITASTNVAVKNFNINELIVKTNGVSVGEYTHFSEDIGSQSRINTVRLETGTRSIFSGGVKFKSGEKLVIDEFYYSPWNYFDARNIKNVEITRKFASSTPENPWGTSKLMFNNLTLGQNAVMDYSQFSNLTIQGDFINNQGTINYLVRGGQVATLNVGNAAAMMFNNDIDSATGFYKPLIKINSAQDLIKNTEHVLLKAKIIGYGNVSTGTNGISNVNLEEQFKERLALYNNNNRMDTCVVRNTDD…
	22386	PRJNA329251	WP_097690831.1	>22386IM:TVVNIFHLNTKADGTLRAGGFKASLSTNAAHLNIGEGGVNLSNQASGRSLLVENLTGNITVEGTLRVNNQVGGAAVAGSSANFEFKAGEDTNNATATFNNDIHLGKAVNLRVDAHTAYFNGNIYLGKSTNLRVNGHSAHFKNIDASKSDNGLNTSALDFSGVTDKVNINKLTTSATNVNIKNFDIKELVVTTRVQSFGQYTIFGENIGDKSRIGVVSLQTGYSPAYSGGVTFKSGKKLVIDEIYHAPWNYFDARNVTDVEINKRILFGAPGNIAGKTGLMFNNLTLNSNASMDYGKDLDLTIQGHFTNNQGTMNLFVQDGRVATLNAGHQASMIFNNVVDSATGFYKPLIKINNAQNLTKNKEHVLVKARNIDYNLVGVQGASYDNISAS…
	22389	PRJNA329249	WP_078269251.1	>22389IM:TVVNIFHLNTKADGTLRAGGFKASLSTNAAHLHIGEGGVNLSNQASGRSLLVENLTGNITVEGTLRVNNQVGGAAVAGSSANFEFKAGEDTNNATATFNNDIHLGKAVNLRVDAHTAYFNGNIYLGKSTNLRVNGHSAHFKNIDASKSDNGLNTSALDFSGVTDKVNINKLTTSATNVNVKNFDIKELVVTTRVQSFGQYTIFGENIGDKSRIGVVSLQTGYSPAYSGGVTFKSGKKLVIDEIYHAPWNYFDARNVTDVEINKRILFGAPGNIAGKTGLMFNNLTLNSNASMDYGKDLDLTIQGHFTNNQGTMNLFVQDGRVATLNAGHQASMIFNNLVDNATGFYKPLIKVNNAQNLTKNKEHVLVKARNIDYNLVGVQGASYDNISAS…
	22390	PRJNA329248	WP_078302384.1	>22390IM:TVVNINRINTNADGTIRVGGYKASLTTNAAHLHIGKGGINLSNQASGRSLLVENLTGNITVDGPLRVNNQVGGYALAGSSANFEFKAGTDTKNGTATFNTIFSLGRFVNLKVDAHTANFKGIDTGNGGFNTLDFSGVTGKVNINKLITASTNVAVKNFNINELIVKTNGVSVGEYTHFSENIGSQSRINTVRLETGTRSIFSGGVKFKGGEKLVINEFYYSPWNYFDARNIKNVEITRKFASSTPENPWGTSKLMFNNLTLGQNAVMDYSQFSNLTIQGDFINNQGTINYLVRGGQVATLNVGNAAAMMFNNDIDSTTGFYKPLIKINSAQDLIKNTEHVLLKAKIIGYGNVSTGTNGISNVNLEEQFKERLALYNNNNRMDTCVVRNTD…
	22402	PRJNA329243	WP_078245243.1	>22402AG:TVVNIDRINTKADGTIKVGGYKASLTTNAAHLNIGKGGVNLSNQASGRTLLVENLTGNITVDGPLRVNNQVGGYALAGSSANFEFKAGTDTKNGTATFNNDISLGRFVNLKVDAHTANFKGIDTGNGGFNTLDFSGVTGKVNINKLITASTNVAAKNFNINELIVKTNGVSVGEYTYFSEDIGSQSRINTVRLETGTRSIFSGGVKFKGGEKLVIDEFYYSPWNYFDARNIKNVEITRKFASSTPENPWGTSKLMFNNLTLGQNAVMDYSQFSNLTIQGDFINNQGTINYLVRGGQVATLNVGNAAAMMFNNDIDSATGFYKPLMKINSAQDLIKNTEHVLLKAKIIGYGNVSTGTNGISNVNLEEQFKERLALYNNNNRMDTCVVRNTD…
	24004	PRJNA329242	WP_078244410.1	>24004G:TVVNINRINTNADGTIRVGGYKASLTTNAAHLHIGKGGINLSNQASGRSLLVENLTGNITVDGPLRVNNQVGGYALAGSSANFEFKAGTDTKNGTATFNNDISLGRFVNLKVDAHTANFKGIDTGNGGFNTLDFSGVTDKVNINKLITASTNVAVKNFNINELIVKTNGISVGEYTHFSEDIGSQSRINTVRLETGTRSIFSGGVKFKSGEKLVIDEFYYSPWNYFDARNVKNVEITRKFASSTPENPWGTSKLMFNNLTLGQNAVMDYSQFSNLTIQGDFINNQGTINYLVRGGKVATLNVGNAAAMMFNNDIDSATGFYKPLIKINSAQDLIKNTEHVLLKAKIIGYGNVSTGTNGISNVNLEEQFKERLALYNNNNRMDTCVVRNTDD…
	24012	PRJNA329239	WP_097551703.1	>24012G:TVVNINRINTNADGTIRVGGYKASLTTNAAHLNIGKGGVNLSNQASGRTLLVENLTGNITVDGPLRVNNQVGGYALAGSSANFEFKAGTDTKNGTATFNNDISLGRFVNLKVDAHTANFKGIDTGNGGFNTLDFSGVTDKVNINKLITASTNVAVKNFNINELIVKTNGVSVGEYTHFSEDIGSQSRINTVRLETGTRSIFSGGVKFKGGEKLVIDEFYYSPWNYFDARNIKNVEITRKFASSTPENPWGTSKLMFNNLTLGQNAVMDYSQFSNLTIQGDFINNQGTINYLVRGGKVATLNVGNAAAMMFNNDIDSATGFYKPLIKINSAQDLIKNTEHVLLKAKIIGYGNVSTGTNGISNVNLEEQFKERLALYNNNNRMDTCVVRNTDD…
	24013	PRJNA329229	WP_097683632.1	>24013AG:TVVNIFHLNTKADGTLRAGGFKASLSTNAAHLHIGEGGVNLSNQASGRSLLVENLTGNITVEGTLRVNNQVGGAAVAGSSANFEFKAGEDTNNATATFNNDIHLGKAVNLRVDAHTAYFNGNIYLGKSTNLRVNGHSAHFKNIDASKSDNGLNTSALDFSGVTDKVNINKLTTSATNVNVKNFDIKELVVTTRVQSFGQYTIFGENIGDKSRIGVVSLQTGYSPAYSGGVTFKSGKKLVIDEIYHAPWNYFDARNVTDVEVNKRILFGAPGNIAGKTGLMFNNLTLNSNASMDYGKDLDLTIQGHFTNNQGTMNLFVQDGRVATLNAGHQASMIFNNLVDSATGFYKPLIKINNAQNLTKNKEHVLVKARNIDYNLVGVQGASYDSISAS…
	26024	PRJNA329227	WP_078265947.1	>26024IM:TVVNIDRINTNADGTIRVGGYKASLTTNAAHLHIGKGGVNLSNQASGRSLLVENLTGNITVDGPLRVNNQVGGYALAGSSANFEFKAGTDTKNGTATFNNDISLGRFVNLKVDAHTANFKGIDTGNGGFNTLDFSGVTGKVNINKLITASTNVAVKNFNINELIVKTNGVSVGEYTHFSEDIGSQSRINTVRLETGTRSIFSGGVKFKGGEKLVINEFYYSPWNYFDARNIKNVEITRKFASSTPENPWGTSKLMFNNLTLGQNAVMDYSQFSNLTIQGDFINNQGTINYLVRGGQVATLNVGNAAAMMFNNDIDSTTGFYKPLIKINSAQDLIKNTEHVLLKAKIIGYGNVSTGTNGISNVNLEEQFKERLALYNNNNRMDTCVVRNTD…
	26083	PRJNA329225	WP_097563194.1	>26083GA:TVVNIDRINTNADGTIRVGGYKASLTTNAAHLHIGKGGVNLSNQASGRSLLVENLTGNITVDGPLRVNNQVGGYALAGSSANFEFKAGTDTKNGTATFNNDISLGRFVNLKVDAHTANFKGIDTGNGGFNTLDFSGVTGKVNINKLITASTNVAVKNFNINELIVKTNGVSVGEYTHFSEDIGSQSRINTVRLETGTRSIFSGGVKFKSGEKLVIDEFYYSPWNYFDARNIKNVEITRKFASSTPENPWGTSKLMFNNLTLGQNAVMDYSQFSNLTIQGDFINNQGTINYLVRGGKVATLSVGNAAAMMFNNDIDSATGFYKPLIKINSAQDLIKNTEHVLLKAKIIGYGNVSTGTNGISNVNLEEQFKERLALYNNNNRMDTCVVRNTD…
	26084	PRJNA329223	WP_078247298.1	>26084GA:TVVNIDRINTNADGTIRVGGYKASLTTNAAHLHIGKGGVNLSNQASGRSLLVENLTGNITVDGPLRVNNQVGGYALAGSSANFEFKAGTDTKNGTATFNNDISLGRFVNLKVDAHTANFKGIDTGNGGFNTLDFSGVTDKVNINKLITASTNVAVKNFNINELIVKTNGISVGEYTHFSEDIGSQSRINTVRLETGTRSIFSGGVKFKSGEKLVIDEFYYSPWNYFDARNIKNVEITRKFASSTPENPWGTSKLMFNNLTLGQNAVMDYSQFSNLTIQGDFINNQGTINYLVRGGKVATLNVGNAAAMMFNNDIDSATGFYKPLIKINSAQDLIKNTEHVLLKAKIIGYGNVSTGTNGISNVNLEEQFKERLALYNNNNRMDTCVVRNTD…
	26093	PRJNA329221	WP_078266429.1	>26093GA:TVVNINRINTNADGTIRVGGYKASLTTNAAHLHIGKGGVNLSNQASGRTLLVENLTGNITVDGPLRVNNQVGGYALAGSSANFEFKAGTDTKNGTATFNNDISLGRFVNLKVDAHTANFKGIDTGNGGFNTLDFSGVTGKVNINKLITASTNVAVKNFNINELIVKTNGVSVGEYTHFSENIGSQSRINTVRLETGTRSIFSGGVKFKGGEKLVIDEFYYSPWNYFDARNIKNVEITRKFASSTPENPWGTSKLMFNNLTLGQNAVMDYSQFSNLTIQGDFINNQGTINYLVRGGQVATLNVGNAAAMMFNNDIDSTTGFYKPLIKINSAQDLIKNTEHVLLKAKIIGYGNVSTGTNGISNVNLEEQFKERLALYNNNNRMDTCVVRNTD…
	26100	PRJNA329220	WP_097697570.1	>26100IM:TVVNINRINTNADGTIRVGGYKASLTTNAAHLNIGKGGVNLSNQASGRSLLVENLTGNITVDGPLRVNNQVGGYALAGSSANFEFKAGTDTKNGTATFNNDISLGRFVNLKVDAHTANFKGIDTGNGGFNTLDFSGVTDKVNINKLITASTNVAVKNFNINELIVKTNGISVGEYTHFSEDIGSQSRINTVRLETGTRSIFSGGVKFKGGEKLVINDFYYAPWNYFDARNIKNVEITNKLAFGPQGSPWGTAKLMFNNLTLGQNAVMDYSQFSNLTIQGDFINNQGTINYLVRGGQVATLSVGNAAAMMFNNDIDSATGFYKPLIKINSAQDLIKNTEHVLLKAKIIGYXNVSTGTNGISNVNLEEQFKERLALYNNNNRMDTCVVRNTD…
	A033	PRJNA329372	WP_097707603.1	>A033IM:TVVNIDRINTNADGTIRVGGYKASLTTNAAHLHIGKGGVNLSNQASGRSLLVENLTGNITVDGPLRVNNQVGGYALAGSNANFEFKAGTDTKNGTATFNNDISLGRFVNLKVDAHTANFKGIDTGNGGFNTLDFSGVTDKVNINKLITASTNVAVKNFNINELIVKTNGVSVGEYTHFSEDIGSQSRINTVRLETGTRSIFSGGVKFKSGEKLVINEFYYSPWNYFDARNVKNVEITRKFASSTPENPWGTSKLMFNNLTLGQNAVMDYSQFSNLTIQGDFINNQGTINYLVRGGKVATLNVGNAAAMMFNNDIDSATGFYKPLIKINSAQDLIKNTEHVLLKAKIIGYGNVSTGTNSISNVNLEEQFKERLALYNNNNRMDTCVVRNTDD…
	A037	PRJNA329217	WP_097686801.1	>A037G:TVVNIDRINTKADGTIKVGGFKASLTTNAAHLNIGKGGVNLSNQASGRTLLVENLTGNITVDGPLRVNNQVGGAALAGSSANFEFKAGTDTKNGTATFNNDISLGRFVNLKVDAHTANFKGIDTGNGGFNTLDFSGVTGKVNINKLITASTNVAVKNFNINELIVKTNGVSVGEYTHFSEDIGSQSRINTVRLETGTRSIFSGGVKFKSGEKLVIDEFYYSPWNYFDARNIKNVEITRKFASSTPENPWGTSKLMFNNLTLGQNAIMDYSQFSNLTIQGDFINNQGTINYLVRGGQVATLNVGNAAAMMFSNDIDSATGFYKPLIKINSAQDLIKNTEHVLLKAKIIGYGNVSTGTNGISNVNLEEQFKERLALYNNNNRMDTCVVRNTDDI…
	A039	PRJNA329216	WP_097706057.1	>A039IM:TVVNIFHLNTKADGTLKAGGFKASLSTNAAHLNIGEGGINLSNQASGRSLLVENLTGNITVEGTLRVNNQVGGAAVAGSSANFEFKAGEDTNNATATFNNDIHLGKAVNLRVDAHTAYFNGNIYLGKSTNLRVNGHSAHFKNIDASKSDNGLNTSALDFSGVTDKVNINKLTTSATNVNVKNFDIKELVVTTRVQSFGQYTIFGENIGDKSRIGVVSLQTGYSPAYSGGVTFKSGKKLVIDEIYHAPWNYFDARNVTDVEINKRILFGAPGNIAGKTGLMFNNLTLNSNASMDYGKDLDLTIQRHFTNNQGTMNLFVQDGRVATLNAGHQASMIFNNVVDSATGFYKPLIKINNAQNLTKNKEHVLVKARNIDYNLVGVQGTSYDNISASN…
	A077	PRJNA329202	WP_097682463.1	>A077G:TVVNIDRINTKADGTIKVGGFKASLTTNAAHLHIGKGGVNLSNQASGRTLLVENLTGNITVDGPLRVNNQVGGYALAGSSANFEFKAGTDTKNGTATFNNDISLGRFVNLKVDAHTANFKGIDTGNGGFNTLDFSGVTGKVNINKLITASTNVAVKNFNINELIVKTNGVSVGEYTHFSENIGSQSRINTVRLETGTRSIFSGGVKFKGGEKLVIDEFYYSPWNYFDARNIKNVEITRKFASSTPENPWGTSKLMFNNLTLGQNAVMDYSQFSNLTIQGDFINNQGTINYLVRGGQVATLNVGNAAAMMFNNDIDSATGFYKPLIKINSAQDLIKNTEHVLLKAKIIGYGNVSTGTNGISNVNLEEQFKERLALYNNNNRMDTCVVRNTDDI…
	A02	563023/RAST	Genome sequence upon request	>A02G:TVVNIFHLNTKADGTLRAGGFKASLSTNAAHLNIGEGGVNLSNQASGRSLLVENLTGNITVEGTLRVNNQVGGAAVAGSSANFEFKAGEDTNNATATFNNDIHLGKAVNLRVDAHTAYFNGNIYLGKSTNLRVNGHSAHFKNIDASKSDNGLNTSALDFSGVTDKVNINKLTTSATNVNIKNFDIKELVVTTRVQSFGQYTIFGENIGDKSRIGVVSLQTGYSPAYSGGVTFKSGKKLVIDEIYHAPWNYFDARNVTDVEINKRILFGAPGNIAGKTGLMFNNLTLNSNASMDYGKDLDLTIQRHFTNNQGTMNLFVQDGRVATLNAGHQASMIFNNVVDSATGFYKPLIKVNNAQNLTKNKEHVLVKARNIDYNLVGVQGASYDNISASNTN…
	22388G	659603/RAST	Genome sequence upon request	>22388G:TVVNIDRINTNADGTIRVGGYKASLTTNAAHLHIGKGGVNLSNQASGRTLLVENLTGNITVDGPLRVNNQVGGYALAGSSANFEFKAGTDTKNGTATFNNDISLGRFVNLKVDAHTANFKGIDTGNGGFNTLDFSGVTGKVNINKLITASTNVAVKNFNINELIVKTNGVSVGEYTHFSENIGSQSRINTVRLETGTRSIFSGGVKFKGGEKLVIDEFYYSPWNYFDARNIKNVEITRKFASSTPENPWGTSKLMFNNLTLGQNAVMDYSQFSNLTIQGDFINNQGTINYLVRGGKVATLNVGNAAAMMFNNDIDSATGFYKPLIKINSAQDLIKNTEHVLLKAKIIGYGNVSTGTSGISNVNLEEQFKERLALYNNNNRMDTCVVRNTDD…
	22391	659612/RAST	Genome sequence upon request	>22391AG:TVVNINRINTNADGTIRVGGYKASLTTNAAHLHIGKGGINLSNQASGRSLLVENLTGNITVDGPLRVNNQVGGYALAGSSANFEFKAGTDTKNGTATFNNDISLGRFVNLKVDAHTANFKGIDTGNGGFNTLDFSGVTGKVNINKLITASTNVAVKNFNINELIVKTNGVSVGEYTHFSEDIGSQSRINTVRLETGTRSIFSGGVKFKGGEKLVIDEFYYSPWNYFDARNIKNVEITRKFASSTPENPWGTSKLMFNNLTLGQNAVMDYSQFSNLTIQGDFINNQGTINYLVRDGKVATLNVGNAAAMMFNNDIDSATGFYKPLIKINSAQDLIKNTEHVLLKAKIIGYGNVSTGTNGISNVNLEEQFKERLALYNNNNRMDTCVVRNTD…
	26096	659611/RAST	Genome sequence upon request	>26096AG:TVVNIDRINTKADGTIRVGGYKASLTTNAAHLNIGKGGVNLSNQASGRTLLVENLTGNITVNGPLRVNNQVGGYALAGSSANFEFKAGTDTKNGTATFNNDISLGRFVNLKVDAHTANFKGIDTGNGGFNTLDFSGVTGKVNINKLITASTNVAVKNFNINELIVKTNGVSVGEYTHFSEDIGSQSRINTVRLETGTRSIFSGGVKFKSGEKLVIDEFYYSPWNYFDARNIKNVEITRKFASSTPENPWGTSKLMFNNLTLGQNAVMDYSQFSNLTIQGDFINNQGTINYLVRGGQVATLNVGNAAAMMFNNDIDSATGFYKPLIKINSAQDLIKNTEHVLLKAKIIGYGNVSTGTNGISNVNLEEQFKERLALYNNNNRMDTCVVRNTD…
	22345	659604/RAST	Genome sequence upon request	>22345IM:TVVNIDRINTNADGTIRVGGYKASLTTNAAHLHXGKGGVNLSNQASGRSXLVENLTGNITVDGPLRVNNQVGGYALAGSSANFEFKAGTDTKNGTATFNNDISLGRFVNLKVDAHTANFKGIDTGNGGFNTLDFSGVTGKVNINKLITASTNVAVKNFNINELIVKTNGVSVGEYTHFSEDIGSQSRINTVRLETGTRSIYSGGVKFKSGEKLVINDFYYAPWNYFDARNIKNVEITNKLAFGPQGSPWGTSKLMFNNLTLGQNAVMDYSQFSNLTIQGDFINNQGTINYLVRGGQVATLNVGNAAAMMFNNDIDSATGFYKPLIKINSAQDLIKNTEHVLLKAKIIGYGNVSTGTNGISNVNLEEQFKERLALYNNNNRMDTCVVRNTD…
	22355	659610/RAST	Genome sequence upon request	>22355IM:TVVNINRINTNADGTIRVGGYKASLTTNAAHLHIGKGGINLSNQASGRSLLVENLTGNITVDGALRVNNQVGGYALAGSSANFEFKAGTDTKNGTATFNNDISLGRFVNLKVDAHTANFKGIDTGNGGFNTLDFSGVTDKVNINKLITASTNVAAKNFNINELIVKTNGVSVGEYTHFSEDIGSQSRINTVRLETGTRSIFSGGVKFKSGEKLVINEFYYSPWNYFDARNVKNVEITRKFASSTPENPWGTSKLMFNNLTLGQNAVMDYSQFSNLTIQGDFINNQGTINYLVRGGKVATLNVGNAAAMMFNNDIDSATGFYKPLIKINSAQDLIKNTEHVLVKAKIIGYGNVSTGTNGISNVNLEEQFKERLALYNNNNRMDTCVVRNTD…
	1071	659605/RAST	Genome sequence upon request	>1071GA:TVVNINRINTNADGTIRVGGYKASLTTNAAHLHIGKGGVNLSNQASGRTLLVENLTGNITVDGPLRVNNQVGGYALAGSSANFEFKAGTDTKNGTATFNNDISLGRFVNLKVDAHTANFKGIDTGNGGFNTLDFSGVTDKVNINKLITASTNVAAKNFNINELIVKTNGVSVGEYTHFSEDIGSQSRINTVRLETGTRSIFSGGVKFKGGEKLVIDEFYYSPWNYFDARNIKNVEITRKFASSTPENPWGTSKLMFNNLTLGQNAVMDYSQFSNLTIQGDFINNQGTINYLVRGGKVATLNVGNAAAMMFNNDIDSATGFYKPLIKINSAQDLIKNTEHVLLKAKIIGYGNVSTGTNGISNVNLEEQFKERLALYNNNNRMDTCVVRNTDD…
	1002	659606/RAST	Genome sequence upon request	>1002GA:TVVNIDRINTNADGTIRVGGYKASLTTNAAHLHIGKGGVNLSNQASGRSLLVENLTGNITVDGPLRVNNQVGGYALAGSSANFEFKAGTDTKNGTATFNNDISLGRFVNLKVDAHTANFKGIDTGNGGFNTLDFSGVTGKVNINKLITASTNVAVKNFNINELIVKTNGVSVGEYTHFSEDIGSQSRINTVRLETGTRSIFSGGVKFKGGEKLVIDEFYYSPWNYFDARNIKNVEITRKFASSTPENPWGTSKLMFNNLTLGQNAVMDYSQFSNLTIQGDFINNQGTINYLVRGGKVATLNVGNAAAMMFNNDIDSATGFYKPLMKINSAQDLIKNTEHVLLKAKIIGYGNVSTGTNGISNVNLEEQFKERLALYNNNNRMDTCVVRNTDD…
	1057	659607/RAST	Genome sequence upon request	>1057GA:TVVNINRINTNADGTIRVGGYKASLTTNAAHLHIGKGGINLSNQASGRSLLVENLTGNITVDGPLRVNNQVGGYALAGSSANFEFKAGTDTKNGTATFNNDISLGRFVNLKVDAHTANFKGIDTGNGGFNTLDFSGVTGKVNINKLITASTNVAVKNFNINELIVKTNGVSVGEYTHFSEDIGSQSRINTVRLETGTRSIFSGGVKFKSGEKLVIDEFYYSPWNYFDARNIKNVEITKKFASSTPENPWGTSKLMFNNLTLGQNAVMDYSQFSNLTIQGDFINNQGTINYLVRGGKVATLSVGNAAAMMFNNDIDSATGFYKPLIKINSAQDLIKNTEHVLLKAKIIGYGNVSTGTNGISNVNLEEQFKERLALYNNNNRMDTCVVRNTDD…
	1088	659608/RAST	Genome sequence upon request	>1088GA:TVVNIDRINTKADGTIKVGGYKASLTTNAAHLHIGKGGVNLSNQASGRTLLVENLTGNITVDGPLRVNNQVGGYALAGSSANFEFKAGTDTKNGTATFNNDISLGRFVNLKVDAHTANFKGIDTGNGGFNTLDFSGVTGKVNINKLITASTNVAAKNFNINELIVKTNGVSVGEYTHFSEDIGSQSRINTVRLETGTRSIFSGGVKFKSGEKLVIDEFYYSPWNYFDARNIKNVEITRKFASSTPENPWGTSKLMFNNLTLGQNAIMDYSQFSNLTIQGDFINNQGTINYLVRGGQVATLNVGNAAAMMFNNDIDSATGFYKPLIKINSAQDLIKNTEHVLLKAKIIGYGNVSTGTNGISNVNLEEQFKERLALYNNNNRMDTCVVRNTDD…
	1097	659609/RAST	Genome sequence upon request	>1097GA:TVVNINRINTNANGTIKVGGYKASLTTNAAHLNIGKGGVNLSNQASGRSLLVENLTGNITVDGPLRVNNQVGGYALAGSSANFEFKAGTDTKNGTATFNNDISLGRFVNLKVDAHTANFKGIDTGNGGFNTLDFSGVTDKVNINKLITASTNVAVKNFXINELIVKTNGVXVGEYTHFSEDIGSQSRINTVRLETGTRSIFSGGVKFKGGEKLVIDEFYYSPWNYFDARNIKNVEITRKFASSTPENPWGTSKLMFNNLTLGQNAVMDYSQFSNLTIQGDFINNQGTINYLVRGGXVATLNVGNAAAMMFNNDIDSATGFYKPLIKINSAQDLIKNTEHVLVKAKIIGYGNVSTGTNGISNVNLEEQFKERLALYNNNNRMDTCVVRNTDD…

## Sheet: Tabelle2
	Strain	Access code	p55 Sequence
	1039	WP_097679453.1	>1039GA:TVVNINRINTNADGTIRVGGYKASLTTNAAHLHIGKGGVNLSNQASGRSLLVENLTGNITVDGPLRVNNQVGGYALAGSSANFEFKAGTDTKNGTATFNNDISLGRFVNLKVDAHTANFKGIDTGNGGFNTLDFSGVTGKVNINKLITASTNVAVKNFNINELIVKTNGVSVGEYTHFSEDIGSQSRINTVRLETGTRSIFSGGVKFKSGEKLVIDEFYYSPWNYFDARNIKNVEITKKFASSTPENPWGTSKLMFNNLTLGQNAVMDYSQFSNLTIQGDFINNQGTINYLVRGGKVATLSVGNAAAMMFNNDIDSATGFYKPLIKINSAQDLIKNTEHVLLKAKIIGYGNVSTGTNGISNVNLEEQFKERLALYNNNNRMDTCVVRNTDD…
	1059	WP_078262674.1	>1059GA:TVVNIDRINTNADGTIRVGGYKASLTTNAAHLHIGKGGVNLSNQASGRTLLVENLTGNITVDGPLRVNNQVGGYALAGSSANFEFKAGTDTKNGTATFNNDISLGRFVNLKVDAHTANFKGIDTGNGGFNTLDFSGVTGKVNINKLITASTNVAAKNFNINELIVKTNGVSVGEYTHFSEDIGSQSRINTVRLETGTRSIFSGGVKFKSGEKLVIDEFYYSPWNYFDARNIKNVEITRKFASSTPENPWGTSKLMFNNLTLGQNAVMDYSQFSNLTIQGDFINNQGTINYLVRGGKVATLNVGNAAAMMFNNDIDSATGFYKPLIKINSAQDLIKNTEHVLLKAKIIGYGNVSTGTNGISNVNLEEQFKERLALYNNNNRMDTCVVRNTDD…
	1061	WP_097703016.1	>1061GA:TVVNIDRINTKADGTIKVGGFKASLTTNAAHLHIGKGGVNLSNQASGRTLLVENLTGNITVDGPLRVNNQVGGYALAGSSANFEFKAGVDTKNGTATFNNDISLGRFVNLKVDAHTANFKGIDTGNGGFNTLDFSGVTGKVNINKLITASTNVAVKNFNINELIVKTNGISVGEYTHFSEDIGSQSRINTVRLETGTRSIFSGGVKFKSGEKLVIDEFYYSPWNYFDARNVKNVEITRKFASSTPENPWGTSKLMFNNLTLGQNAVMDYSQFSNLTIQGDFINNQGTINYLVRGGQVATLNVGNAAAMMFNNDIDSATGFYKPLIKINSAQDLIKNTEHVLLKAKIIGYGNVSTGTNGISNVNLEEQFKERLALYNNNNRMDTCVVRNTDD…
	1077	WP_097555982.1	>1077GA:TVVNINRINTNADGTIRVGGYKASLTTNAAHLHIGKGGINLSNQASGRSLLVENLTGNITVDGPLRVNNQVGGYALAGSSANFEFKAGTDTKNGTATFNNDISLGRFVNLKVDAHTANFKGIDTGNGGFNTLDFSGVTGKVNINKLITASTNVAVKNFNINELIVKTNGVSVGEYTHFSENIGSQSRINTVRLETGTRSIFSGGVKFKGGEKLVINEFYYSPWNYFDARNIKNVEITRKFASSTPENPWGTSKLMFNNLTLGQNAVMDYSQFSNLTIQGDFINNQGTINYLVRGGQVATLNAGHQASMIFNNVVDSATGFYKPLIKINNAQNLTKNKEHVLVKARNIDYNLVGVQGASYDNISASNTNLQEQFKERLALYNNNNRMDICVV…
	1081	WP_097721031.1	>1081GA:TVVNIDRINTKADGTIKVGGFKASLTTNAAHLHIGKGGVNLSNQASGRTLLVENLTGNITVDGPLRVNNQVGGYALAGSSANFEFKAGTDTKNGTATFNNDISLGRFVNLKVDAHTANFKGIDTGNGGFNTLDFSGVTGKVNINKLITASTNVAVKNFNINELIVKTNGVSVGEYTHFSENIGSQSRINTVRLETGTRSIFSGGVKFKGGEKLVIDEFYYSPWNYFDARNIKNVEITRKFASSTPENPWGTSKLMFNNLTLGQNAVMDYSQFSNLTIQGDFINNQGTINYLVRGGQVATLNVGNAAAMMFNNDIDSTTGFYKPLIKINSAQDLIKNTEHVLLKAKIIGYGNVSTGTNGISNVNLEEQFKERLALYNNNNRMDTCVVRNTDD…
	1086	WP_097638639.1	>1086GA:TVVNIDRINTKADGTIRVGGYKASLTTNAAHLHIGKGGINLSNQASGRSLLVENLTGNITVDGPLRVNNQVGGYALAGSSANFEFKAGTDTKNGTATFNNDISLGRFVNLKVDAHTANFKGIDTGNGGFNTLDFSGVTGKVNINKLITASTNVAVKNFNINELIVKTNGVSVGEYTHFSEDIGSQSHINTVRLETGTRSIFSGGVKFKSGEKLVINEFYYSPWNYFDARNIKNVEITRKFASSTPENPWGTSKLMFNNLTLGQNAVMDYSQFSNLTIQGDFINNQGTINYLVRGGKVATLNVGNAAAMMFNNDIDSATGFYKPLIKINSAQDLIKNTEHVLVKAKIIGYGNVSTGTNGISNVNLEEQFKERLALYNNNNRMDTCVVRNTDD…
	1093	WP_097567230.1	>1093GA:TVVNINRINTNADGTIRVGGYKASLTTNAAHLNIGKGGVNLSNQASGRTLLVENLTGNITVDGPLRVNNQVGGYALAGSSANFEFKAGTDTKNGTATFNNDISLGRFVNLKVDAHTANFKGIDTGNGGFNTLDFSGVTGKVNINKLITASTNVAVKNFNINELIVKTNGVSVGEYTHFSEDIGSQSRINTVRLETGTRSIFSGGVKFKSGEKLVINEFYYSPWNYFDARNIKNVEITRKFASSTPENPWGTSKLMFNNLTLGQNAVMDYSQFSNLTIQGDFINNQGTINYLVRGGKVATLSVGNAAAMMFNNDIDSATGFYKPLIKINSAQDLIKNTEHVLLKAKIIGYGNVSTGTNGISNVNLEEQFKERLALYNNNNRMDTCVVRNTDD…
	1095	WP_097556837.1	>1095GA:TVVNIDRINTKADGTIRVGGYKASLTTNAAHLHIGKGGVNLSNQASGRSLLVENLTGNITVDGALRVNNQVGGYALAGSSANFEFKAGTDTKNGTATFNNDISLGRFVNLKVDAHTANFKGIDTGNGGFNTLDFSGVTDKVNINKLITASTNVAAKNFNINELIVKTNGVSVGEYTHFSEDIGSQSRINTVRLETGTRSIFSGGVKFKSGEKLVINEFYYSPWNYFDARNVKNVEITRKFASSTPENPWGTSKLMFNNLTLGQNAVMDYSQFSNLTIQGDFINNQGTINYLVRGGKVATLNAGHQASMIFNNVVDSATGFYKPLIKINNAQNLTKNKEHVLVKARNIDYNLVGVQGASYDNISASNTNLQEQFKERLALYNNNNRMDICVV…
	1102	WP_097716442.1	>1102GA:TVVNIDRINTNADGTIRVGGYKASLTTNAAHLHIGKGGVNLSNQASGRSLLVENLTGNITVDGPLRVNNQVGGYALAGSSANFEFKAGTDTKNGTATFNNDISLGRFVNLKVDAHTANFKGIDTGNGGFNTLDFSGVTGKVNINKLITASTNVAVKNFNINELIVKTNGVSVGEYTHFSEDIGSQSRINTVRLETGTRSIFSGGVKFKGGEKLVIDEFYYSPWNYFDARNIKNVEITRKFASSTPENPWGTSKLMFNNLTLGQNAVMDYSQFSNLTIQGDFINNQGTINYLVRGGKVATLNVGNAAAMMFNNDIDSATGFYKPLMKINSAQDLIKNTEHVLLKAKIIGYGNVSTGTNGISNVNLEEQFKERLALYNNNNRMDTCVVRNTDD…
	2007	WP_097694292.1	>2007IM:TVVNINRINTNADGTIRVGGYKASLTTNAAHLHIGKGGINLSNQASGRSLLVENLTGNITVDGPLRVNNQVGGYALAGSSANFEFKAGTDTKNGTATFNNDISLGRFVNLKVDAHTANFKGIDTGNGGFNTLDFSGVTGKVNINKLITASTNVAVKNFNINELIVKTNGVSVGEYTHFSEDIGSQSRINTVRLETGTRSIYSGGVKFKGGEKLVINDFYYAPWNYFDARNIKNVEITRKFASSTPENPWGTSKLMFNNLTLGQNAIMDYSQFSNLTIQGDFINNQGTINYLVRGGQVATLNVGNAAAMMFNNDIDSATGFYKPLIKINSAQDLIKNTEHVLLKAKIIGYGNVSTGTNGISNVNLEEQFKERLALYNNNNRMDTCVVRNTDD…
	2010	WP_097701479.1	>2010IM:TVVNIDRINTKADGTIRVGGYKASLTTNAAHLHIGKGGVNLSNQASGRSLLVENLTGNITVDGPLRVNNQVGGYALAGSSANFEFKAGTDTKNGTATFNNDISLGRFVNLKVDAHTANFKGIDTGNGGFNTLDFSGVTDKVNINKLITASTNVAIKNFNINELIVKTNGVSVGEYTHFSEDIGSQSRINTVRLETGTRSIYSGGVKFKGGEKLVINDFYYAPWNYFDARNIKNVEITNKLAFGPQGSPWGTSKLMFNNLTLGQNAVMDYSQFSNLTIQGDFINNQGTINYLVRGGQVATLNVGNAAAMMFNNDIDSATGFYKPLMKINSAQDLIKNTEHVLLKAKIIGYGNVSTGTNGISNVNLEEQFKERLALYNNNNRMDTCVVRNTDD…
	2015	WP_097700485.1	>2015G:TVVNIFHLNTKADGTLRAGGFKASLSTNAAHLHIGEGGINLSNQASGRTLLVENLTGNITVEGTLRVNNQVGGAAVAGSSANFEFKAGEDTNNATATFNNDIHLGKAVNLRVDAHTAYFNGNVYLGKSTNLRVNGHSAHFKNIDASKSDNGLNTSALDFSGVTDKVNINKLTTSATNVNVKNFDIKELVVTTRVQSFGQYTIFGENIGDKSRIGVVSLQTGYSPAYSGGVTFKSGKKLVIDEIYHAPWNYFDARNVTDVEINKRILFGAPGNIAGKTGLMFNNLTLNSNASMDYGKDLDLTIQRHFTNNQGTMNLFVQDGRVATLNAGHQASMIFNNLVDSATGFYKPLIKINNAQNLTKNKEHVLVKARNIDYNLVGVQGASYDNISASNT…
	2020	WP_097719295.1	>2020G:TVVNIFHLNTKADGTLRAGGFKASLSTNAAHLNIGEGGVNLSNQASGRSLLVENLTGNITVEGTLRVNNQVGGAAVAGSSANFEFKAGEDTNNATATFNNDIHLGKAVNLRVDAHTAYFNGNIYLGKSTNLRVNGHSAHFKNIDASKSDNGLNTSALDFSGVTDKVNINKLTTSATNVNIKNFDIKELVVTTRVQSFGQYTIFGENIGDKSRIGVVSLQTGYSPAYSGGVTFKSGKKLVIDEIYHAPWNYFDARNVTDVEINKRILFGAPGNIAGKTGLMFNNLTLNSNASMDYGKDLDLTIQRHFTNNQGTMNLFVQDGRVATLNAGHQASMIFNNVVDSATGFYKPLIKINNAQNLTKNKEHVLVKARNIDYNLVGVQGASYDNISASNT…
	2021	WP_097678684.1	>2021IM:TVVNIDRINTNADGTIRVGGFKASLTTNAAHLHIGKGGVNLSNQASGRSLLVENLTGNITVDGPLRVNNQVGGAALAGSSANFEFKAGTDTKNGTATFNNDISLGRFVNLKVDAHTANFKGIDTGNGGFNTLDFSGVTGKVNINKLITASTNVAVKNFNINELIVKTNGVSVGEYTHFSEDIGSQSRINTVRLETGTRSIFSGGVKFKSGEKLVIDEFYYSPWNYFDARNIKNVEITRKFASSTPENPWGTSKLMFNNLTLGQNAVMDYSQFSNLTIQGDFINNQGTINYLVRGGQVATLNVGNAAAMMFNNDIDSATGFYKPLIKINSAQDLIKNTEHVLLKAKIIGYGNVSTGTNGISNVNLEEQFKERLALYNNNNRMDTCVVRNTDD…
	2025	WP_097714339.1	>2025G:TVVNIDRINTNADGTIRVGGYKASLTTNAAHLHIGKGGVNLSNQASGRSLLVENLTGNITVDGPLRVNNQVGGYALAGSSANFEFKAGTDTKNGTATFNNDISLGRFVNLRVDAHTANFKGIDTGNGGFNTLDFSGVTGKVNINKLITASTNVAVKNFNINELIVKTNGVSVGEYTHFSEDIGSQSRINTVRLETGTRSIFSGGVKFKSGEKLVINEFYYSPWNYFDARNIKNVEITRKFASSTPENPWGTSKLMFNNLTLGQNAVMDYSQFSNLTIQGDFINNQGTINYLVRGGQVATLNVGNAAAMMFNNDIDSATGFYKPLIKINSAQDLIKNTEHVLLKAKIIGYGNVSTGTNGISNVNLEEQFKERLALYNNNNRMDTCVVRNTDDI…
	2027	WP_097693221.1	>2027IM:TVVNIDRINTNADGTIRVGGYKASLTTNAAHLHIGKGGVNLSNQASGRSLLVENLTGNITVDGPLRVNNQVGGYALAGSSANFEFKAGTDTKNGTATFNNDISLGRFVNLKVDAHTANFKGIDTGNGGFNTLDFSGVTGKVNINKLITASTNVAVKNFNINELIVKTNGVSVGEYTHFSEDIGSQSRINTVRLETGTRSIFSGGVKFKSGEKLVIDEFYYSPWNYFDARNIKNVEITKKFASSTPENPWGTSKLMFNNLTLGQNAVMDYSQFSNLTIQGDFINNQGTINYLVRGGKVATLSVGNAAAMMFNNDIDSATGFYKPLIKINSAQDLIKNTEHVLLKAKIIGYGNVSTGTNGISNVNLEEQFKERLALYNNNNRMDTCVVRNTDD…
	2029	WP_097559047.1	>2029IM:TVVNIDRINTKADGTIKVGGYKASLTTNAAHLNIGKGGVNLSNQASGRTLLVENLTGNITVNGPLRVNNQVGGYALAGSSANFEFKAGTDTKNGTATFNNDISLGRFVNLKVDAHTANFKGIDTGNGGFNTLDFSGVTGKVNINKLITASTNVAVKNFNINELIVKTNGVSVGEYTHFSENIGSQSRINTVRLETGTRSIFSGGVKFKGGEKLVIDEFYYSPWNYFDARNIKNVEITRKFASSTPENPWGTSKLMFNNLTLGQNAVMDYSQFSNLTIQGDFINNQGTINYLVRGGQVATLNVGNAAAMMFNNDIDSTTGFYKPLIKINSAQDLIKNTEHVLLKAKIIGYGNVSTGTNGISNVNLEEQFKERLALYNNNNRMDTCVVRNTDD…
	2036	WP_097692776.1	>2036AG:TVVNIDRINTKADGTIRVGGYKASLTTNAAHLHIGKGGVNLSNQASGRTLLVENLTGNITVDGPLRVNNQVGGYALAGSSANFEFKAGTDTKNGTATFNNDISLGRFVNLKVDAHTANFKGIDTGNGGFNTLDFSGVTGKVNINKLITASTNVAVKNFNINELIVKTNGVSVGEYTHFSENIGSQSRINTVRLETGTRSIFSGGVKFKGGEKLVIDEFYYSPWNYFDARNIKNVEITKKFASSTPENPWGTSKLMFNNLTLGQNAIMDYSQFSNLTIQGDFINNQGTINYLVRGGKVATLNVGNAAAMMFNNDIDSATGFYKPLIKINSAQDLIKNTEHVLLKAKIIGYGNVSTGTNGISNVNLEEQFKERLALYNNNNRMDTCVVRNTDD…
	2040	WP_097718567.1	>2040AG:TVVNIDRINTNADGTIRVGGYKASLTTNAAHLHIGKGGVNLSNQASGRSLLVENLTGNITVDGPLRVNNQVGGYALAGSSANFEFKAGTDTKNGTATFNNDISLGRFVNLKVDAHTANFKGIDTGNGGFNTLDFSGVTGKVNINKLITASTNVAVKNFNINELIVKTNGVSVGEYTHFSEDIGSQSRINTVRLETGTRSIFSGGVKFKSGEKLVINEFYYSPWNYFDARNIKNVEITRKFASSTPENPWGTSKLMFNNLTLGQNAVMDYSQFSNLTIQGDFINNQGTINYLVRGGKVATLSVGNAAAMMFNNDIDSATGFYKPLIKINSAQDLIKNTEHVLLKAKIIGYGNVSTGTNGISNVNLEEQFKERLALYNNNNRMDTCVVRNTDD…
	2047	WP_097691452.1	>2047IM:TVVNIDRINTKADGTIKVGGFKASLTTNAAHLHIGKGGVNLSNQASGRTLLVENLTGNITVDGPLRVNNQVGGYALAGSSANFEFKAGTDTKNGTATFNNDISLGRFVNLKVDAHTAYFKGIDTGNGGFNTLDFSGVTGKVNINKLITASTNVAVKNFNINELIVKTNGVSVGEYTHFSEDIGSQSRINTVRLETGTRSIFSGGVKFKSGEKLVIDEFYYSPWNYFDARNIKNVEITRKFASSTPENPWGTSKLMFNNLTLGQNAVMDYSQFSNLTIQGDFINNQGTINYLVRGGQVATLNVGNAAAMMFNNDIDSATGFYKPLIKINSAQDLIKNTEHVLLKAKIIGYGNVSTGTNGISNVNLEEQFKERLALYNNNNRMDTCVVRNTDD…
	2061	WP_097716442.1	>2061AG:TVVNIDRINTNADGTIRVGGYKASLTTNAAHLHIGKGGVNLSNQASGRSLLVENLTGNITVDGPLRVNNQVGGYALAGSSANFEFKAGTDTKNGTATFNNDISLGRFVNLKVDAHTANFKGIDTGNGGFNTLDFSGVTGKVNINKLITASTNVAVKNFNINELIVKTNGVSVGEYTHFSEDIGSQSRINTVRLETGTRSIFSGGVKFKGGEKLVIDEFYYSPWNYFDARNIKNVEITRKFASSTPENPWGTSKLMFNNLTLGQNAVMDYSQFSNLTIQGDFINNQGTINYLVRGGKVATLNVGNAAAMMFNNDIDSATGFYKPLMKINSAQDLIKNTEHVLLKAKIIGYGNVSTGTNGISNVNLEEQFKERLALYNNNNRMDTCVVRNTDD…
	2065	WP_097699977.1	>2065G:TVVNIDRINTKADGTIRVGGYKASLTTNAAHLHIGKGGVNLSNQASGRSLLVENLTGNITVDGALRVNNQVGGYALAGSSANFEFKAGTDTKNGTATFNNDISLGRFVNLKVDAHTANFKGIDTGNGGFNTLDFSGVTDKVNINKLITASTNVAAKNFNINELIVKTNGVSVGEYTHFSEDIGSQSRINTVRLETGTRSIFSGGVKFKSGEKLVINEFYYSPWNYFDARNVKNVEITRKFASSTPENPWGTSKLMFNNLTLGQNAVMDYSQFSNLTIQGDFINNQGTINYLVRGGKVATLNVGNAAAMMFNNDIDSATGFYKPLIKINSAQDLIKNTEHVLVKAKIIGYGNVSTGTNGISNVNLEEQFKERLALYNNNNRMDTCVVRNTDDI…
	3004	WP_097717579.1	>3004IM:TVVNIDRINTNADGTIRVGGYKASLTTNAAHLHIGKGGVNLSNQASGRSLLVENLTGNITVDGPLRVNNQVGGYALAGSSANFEFKAGTDTKNGTATFNNDISLGRFVNLKVDAHTANFKGIDTGNGGFNTLDFSGVTGKVNINKLITASTNVAVKNFNINELIVKTNGVSVGEYTHFSEDIGSQSRINTVRLETGTRSIFSGGVKFKSGEKLVIDEFYYSPWNYFDARNIKNVEITKKFASSTPENPWGTSKLMFNNLTLGQNAVMDYSQFSNLTIQGDFINNQGTINYLVRGGKVATLSVGNAAAMMFNNDIDSATGFYKPLIKINSAQDLIKNTEHVLLKAKIIGYGNVSTGTNGISNVNLEEQFKERLALYNNNNRMDTCVVRNTDD…
	3026	WP_097716154.1	>3026IM:TVVNIDRINTKADGTIKVGGYKASLTTNAAHLHIGKGGVNLSNQASGRTLLVENLTGNITVDGPLRVNNQVGGYALAGSSANFEFKAGTDTKNGTATFNNDISLGRFVNLKVDAHTANFKGIDTGNGGFNTLDFSGVTGKVNINKLITASTNVAVKNFNINELIVKTNGVSVGEYTHFSEDIGSQSRINTVRLETGTRSIFSGGVKFKSGEKLVIDEFYYSPWNYFDARNIKNVEITRKFASSTPENPWGTSKLMFNNLTLGQNAVMDYSQFSNLTIQGDFINNQGTINYLVRGGKVATLNVGNAAAMMFNNDIDSATGFYKPLIKINSAQDLIKNTEHVLLKAKIIGYGNVSTGTNSISNVNLEEQFKERLALYNNNNRMDTCVVRNTDD…
	3029	WP_097699347.1	>3029G:TVVNIDRINTNADGTIRVGGYKASLTTNAAHLHIGKGGVNLSNQASGRSLLVENLTGNITVDGPLRVNNQVGGYALAGSSANFEFKAGTDTKNGTATFNNDISLGRFVNLKVDAHTANFKGIDTGNGGFNTLDFSGVTGKVNINKLITASTNVAVKNFNINELIVKTNGVSVGEYTHFSEDIGSQSHINTVRLETGTRSIFSGGVKFKSGEKLVINEFYYSPWNYFDARNIKNVEITRKFASSTPENPWGTSKLMFNNLTLGQNAVMDYSQFSNLTIQGDFINNQGTINYLVRGGQVATLNVGNAAAMMFNNDIDSATGFYKPLIKINSAQDLIKNTEHVLLKAKIIGYGNVSTGTNGISNVNLEEQFKERLALYNNNNRMDTCVVRNTDDI…
	3033	WP_097713258.1	>3033G:TVVNIDRINTKADGTIRVGGYKASLTTNAAHLHIGKGGVNLSNQASGRSLLVENLTGNITVDGPLRVNNQVGGYALAGSSANFEFKAGTDTKNGTATFNNDISLGRFVNLKVDAHTANFKGIDTGNGGFNTLDFSGVTGKVNINKLITASTNVAAKNFNINELIVKTNGVSVGEYTHFSEDIGSQSRINTVRLETGTRSIYSGGVKFKGGEKLVINDFYYAPWNYFDARNIKNVEITNKLAFGPQGSPWGTSKLMFNNLTLGQNAVMDYSQFSNLTIQGDFINNQGTINYLVRGGQVATLNVGNAAAMMFNNDIDSATGFYKPLIKINSAQDLIKNTEHVLLKAKIIGYGNVSTGTNGISNVNLEEQFKERLALYNNNNRMDTCVVRNTDDI…
	3046	WP_097683364.1	>3046G:TVVNIDRINTNADGTIRVGGFKASLTTNAAHLHIGKGGVNLSNQASGRSLLVENLTGNITVDGPLRVNNQVGGYALAGSSANFEFKAGTDTKNGIATFNNDISLGRFVNLKVDAHTANFKGIDTGNGGFNTLDFSGVTDKVNINKLITASTNVAIKNFNINELIVKTNGVSVGEYTHFSEDIGSQSRINTVRLETGTRSIFSGGVKFKGGEKLVIDEFYYSPWNYFDARNIKNVEITRKFASSTPENPWGTSKLMFNNLTLGQNAVMDYSQFSNLTIQGDFINNQGTINYLVRGGQVATLNVGNAAAMMFNNDIDSATGFYKPLIKINSAQDLIKNTEHVLLKAKIIGYGNVSTGTNGISNVNLEEQFKERLALYNNNNRMDTCVVRNTDDI…
	3053	WP_097704451.1	>3053AG:TVVNIFHLNTKADGTLRAGGFKASLSTNAAHLNIGEGGVNLSNQASGRTLLVENLTGNITVEGTLRVNNQVGGAAVAGSSANFEFKAGEDTNNATATFNNDIHLGKAVNLRVDAHTANFNGNIYLGKSTNLRVNGHSAHFKNIDASKSDNGLNTSSLDFSGVTDKVNINKLTTSATNVNVKNFDIKELVVTTRVQSFGQYTIFGENIGDQSRIGVVSLQTGYSPAYSGGVTFKSGKKLVIDEIYHAPWNYFDARNITDVEVNKRILFGAPGNIAGKTGLMFNNLTLNSNASMDYGKDLDLTIQGNFTNNQGTMNLFVQNGRVATLNAGHQASMMFNNVVDSATGFYKPLIKINDAQNLTKNKEHVLVKARNIDYNLVGVQGASYDSISSSN…
	3056	WP_097682086.1	>3056AG:TVVNIDRINTNADGTIRVGGYKASLTTNAAHLHIGKGGVNLSNQASGRSLLVENLTGNITVDGPLRVNNQVGGYALAGSSANFEFKAGTDTKNGTATFNNDISLGRFVNLKVDAHTANFKGIDTGNGGFNTLDFSGVTGKVNINKLITASTNVAVKNFNINELIVKTNGVSVGEYTHFSEDIGSQSRINTVRLETGTRSIFSGGVKFKSGEKLVIDEFYYSPWNYFDARNIKNVEITKKFASSTPENPWGTSKLMFNNLTLGQNAVMDYSQFSNLTIQGDFINNQGTINYLVRGGKVATLSVGNAAAMMFNNDIDSATGFYKPLIKINSAQDLIKNTEHVLLKAKIIGYGNVSTGTNGISNVNLEEQFKERLALYNNNNRMDTCVVRNTDD…
	3076	WP_097696629.1	>3076AG:TVVNIFHLNTKADGTLKAGGFKASLSTNAAHLNIGEGGINLSNQASGRSLLVENLTGNITVEGTLRVNNQVGGAAVAGSSANFEFKAGEDTNNATATFNNDIHLGKAVNLRVDAHTANFNGNIYLGKSTNLRVNGHTAHFKNIDASKSDNGLNTSSLDFSGVTDKVNINKLTTSATNVNVKNFDIKELVVTTRVQSFGQYTIFGENIGDKSRIGVVSLQTGYSPAYSGGVTFKSGKKLVIDELYHAPWNYFDARNITDVEVNKRILFGAPGNIAGKTGLMFNNLTLNSNASMDYGKDLDLTIQRHFTNNQGTMNLFVQDGRVATLNAGHQASMIFNNLVDSATGFYKPLIKINNAQNLTKNKEHVLVKARNIDYNLVGVQGASYDSISSSN…
	3096	WP_097681390.1	>3096AG:TVVNIDRINTNADGTIRVGGFKASLTTNAAHLHIGKGGVNLSNQASGRSLLVENLTGNITVDGPLRVNNQVGGYALAGSSANFEFKAGTDTKNGTATFNNDISLGRFVNLKVDAHTANFKGIDTGNGGFNTLDFSGVTGKVNINKLITASTNVAVKNFNINELIVKTNGVSVGEYTHFSEDIGSQSRINTVRLETGTRSIFSGGVKFKSGEKLVIDEFYYSPWNYFDARNIKNVEITRKFASSTPENPWGTSKLMFNNLTLGQNAVMDYSQFSNLTIQGDFINNQGTINYLVRGGQVATLNVGNAAAMMFNNDIDSATGFYKPLIKINSAQDLIKNTEHVLLKAKIIGYGNVSTGTNGISNVNLEEQFKERLALYNNNNRMDTCVVRNTDD…
	3118	WP_097713258.1	>3118AG:TVVNIDRINTKADGTIRVGGYKASLTTNAAHLHIGKGGVNLSNQASGRSLLVENLTGNITVDGPLRVNNQVGGYALAGSSANFEFKAGTDTKNGTATFNNDISLGRFVNLKVDAHTANFKGIDTGNGGFNTLDFSGVTGKVNINKLITASTNVAAKNFNINELIVKTNGVSVGEYTHFSEDIGSQSRINTVRLETGTRSIYSGGVKFKGGEKLVINDFYYAPWNYFDARNIKNVEITNKLAFGPQGSPWGTSKLMFNNLTLGQNAVMDYSQFSNLTIQGDFINNQGTINYLVRGGQVATLNVGNAAAMMFNNDIDSATGFYKPLIKINSAQDLIKNTEHVLLKAKIIGYGNVSTGTNGISNVNLEEQFKERLALYNNNNRMDTCVVRNTDD…
	3120	WP_097705678.1	>3120AG:TVVNIDRINTNADGTIRVGGYKASLTTNAAHLHIGKGGVNLSNQASGRTLLVENLTGNITVDGPLRVNNQVGGYALAGSSANFEFKAGTDTKNGTATFNNDISLGRFVNLKVDAHTANFKGIDTGNGGFNTLDFSGVTGKVNINKLITASTNVAVKNFNINELIVKTNGVSVGEYTHFSENIGSQSRINTVRLETGTRSIFSGGVKFKGGEKLVIDEFYYSPWNYFDARNIKNVEITRKFASSTPENPWGTSKLMFNNLTLGQNAVMDYSQFSNLTIQGDFINNQGTINYLVRGGQVATLNVGNAAAMMFNNDIDSTTGFYKPLIKINSAQDLIKNTEHVLLKAKIIGYGNVSTGTNGISNVNLEEQFKERLALYNNNNRMDTCVVRNTDD…
	3125	WP_097722865.1	>3125AG:TVVNIDRINTKADGTIKVGGFKASLTTNAAHLNIGKGGVNLSNQASGRTLLVENLTGNITVDGPLRVNNQVGGYALAGSSANFEFKAGVDTKNGTATFNNDISLGRFVNLKVDAHTANFKGIDTGNGGFNTLDFSGVTGKVNINKLITASTNVAVKNFNINELIVKTNGISVGEYTHFSEDIGSQSRINTVRLETGTRSIFSGGVKFKSGEKLVIDEFYYSPWNYFDARNVKNVEITRKFASSTPENPWGTSKLMFNNLTLGQNAVMDYSQFSNLTIQGDFINNQGTINYLVRGGQVATLNVGNAAAMMFNNDIDSATGFYKPLIKINSAQDLIKNTEHVLLKAKIIGYGNVSTGTNGISNVNLEEQFKERLALYNNNNRMDTCVVRNTDD…
	3133	WP_097690062.1	>3133AG:TVVNIDRINTNADGTIRVGGFKASLTTNAAHLHIGKGGVNLSNQASGRSLLVENLTGNITVDGPLRVNNQVGGAALAGSSANFEFKAGTDTKNGTATFNNDIHLGKAVNLRVDAHTANFNGNIYLGKSTNLRVNGHSAHFKNIDASKSDNGLNTSALDFSGVTDKVNINKLTTSATNVNVKNFDIKELVVTTRVQSFGQYTIFGENIGDKSRIGVVSLQTGYSPAYSGGVTFKSGKKLVIDEIYHAPWNYFDARNVTDVEVNKRILFGAPGNIAGKTGLMFNNLTLNSNASMDYGKDLDLTIQRHFTNNQGTMNLFVQDGRVATLNAGHQASMIFNNLVDSATGFYKPLIKINNAQNLTKNKEHVLVKARNIDYNLVGVQGASYDNISASN…
	3136	WP_097688208.1	>3136G:TVVNIFHLNTKADGTLRAGGFKASLSTNAAHLNIGEGGVNLSNQASGRSLLVENLTGNITVEGTLRVNNQVGGAAVAGSSANFEFKAGEDTNNATATFNNDIHLGKAVNLRVDAHTAYFNGNIYLGKSTNLRVNGHSAHFKNIDASKSDNGLNTSSLDFSGVTDKVNINKLTTSATNVNVKNFDIKELVVTTRVQSFGQYTIFGENIGDKSRIGVVSLQTGYSPAYSGGVTFKSGKKLVIDEIYHAPWNYFDARNVTDVEINKRILFGAPGNIAGKTGLMFNNLTLNSNASMDYGKDLDLTIQGHFTNNQGTMNLFVQDGRVATLNAGHQASMMFNNVVDSATGFYKPLIKINNAQNLTKNKEHVLVRARNIDYNLVGVQGASYDNISASNT…
	22003	WP_097723982.1	>22003IM:TVVNINRINTNADGTIRVGGYKASLTTNAAHLHIGKGGINLSNQASGRSLLVENLTGNITVDGPLRVNNQVGGYALAGSSANFEFKAGTDTKNGTATFNYDISLGRFVNLKVDAHTANFKGIDTGNGGFNTLDFSGVTDKVNINKLITASTNVAVKNFNINELIVKTNGISVGEYTHFSEDIGSQSRINTVRLETGTRSIFSGGVKFKSGEKLVIDEFYYSPWNYFDARNVKNVEITRKFASSTPENPWGTSKLMFNNLTLGQNAVMDYSQFSNLTIQGDFINNQGTINYLVRGGKVATLNVGNAAAMMFNNDIDSATGFYKPLIKINSAQDLIKNTEHVLLKAKIIGYGNVSTGTNGISNVNLEEQFKERLALYNNNNRMDTCVVRNTD…
	22013	WP_097722386.1	>22013AG:TVVNIDRINTNADGTIRVGGFKASLTTNAAHLHIGKGGVNLSNQASGRSLLVENLTGNITVDGPLRVNNQVGGAALAGSSANFEFKAGTDTKNGTATFNNDISLGRFVNLKVDAHTANFKGIDTGNGGFNTLDFSGVTGKVNINKLITASTNVAVKNFNINELIVKTNGVSVGEYTHFSEDIGSQSRINTVRLETGTRSIFSGGVKFKSGEKLVIDEFYYSPWNYFDARNIKNVEITRKFASSTPENPWGTSKLMFNNLTLGQNAVMDYSQFSNLTIQGDFINNQGTINYLVRGGQVATLNAGHQASMIFNNVVDSATGFYKPLIKINNAQNLTKNKEHVLVKARNIDYNLVGVQGASYDNISASNTNLQESFKERLALYNNNNRMDICV…
	22019	WP_078251020.1	>22019AG:TVVNINRINTNADGTIRVGGYKASLTTNAAHLHIGKGGVNLSNQASGRSLLVENLTGNITVDGPLRVNNQVGGYALAGSSANFEFKAGTDTKNGTATFNNDISLGRFVNLKVDAHTANFKGIDTGNGGFNTLDFSGVTGKVNINKLITASTNVAVKNFNINELIVKTNGVSVGEYTHFSEDIGSQSRINTVRLETGTRSIFSGGVKFKGGEKLVIDEFYYSPWNYFDARNIKNVEITKKFASSTPENPWGTSKLMFNNLTLGQNAVMDYSQFSNLTIQGDFINNQGTINYLVRGGKVATLSVGNAAAMMFNNDIDSATGFYKPLIKINSAQDLIKNTEHVLLKAKIIGYGNVSTGTNGISNVNLEEQFKERLALYNNNNRMDTCVVRNTD…
	22020	WP_078242373.1	>22020IM:TVVNIFHLNTKADGTIRAGGFKASLSTNAAHLNIGEGGVNLSNQASGRSLLVENLTGNITVEGTLRVNNQVGGAAVAGSSANFEFKAGEDTNNATATFNNDIHLGKAVNLRVDAHTAYFNGNVYLGKSTNLRVNGHSAHFKNIDASKSDNGLNTSALDFSGVTDKVNINKLTTSATNVNVKNFDIKELVVTTRVQSFGQYTIFGENIGDKSRIGVVSLQTGYSPAYSGGVTFKSGKKLVIDEIYHAPWNYFDARNVTDVEINKRILFGAPGNIAGKTGLMFNNLTLNSNASMDYGKDLDLTIQGHFTNNQGTMNLFVQDGRVATLNAGHQASMIFNNLVDSATGFYKPLIKINNAQNLTKNKEHVLVKARNIDYNLVGVQGTSYDNISAS…
	22021	WP_078250007.1	>22021G:TVVNIDRINTNADGTIRVGGYKASLTTNAAHLHIGKGGVNLSNQASGRSLLVENLTGNITVDGPLRVNNQVGGYALAGSSANFEFKAGTDTKNGTATFNNDISLGRFVNLKVDAHTANFKGIDTGNGGFNTLDFSGVTGKVNINKLITASTNVAVKNFNINELIVKTNGVSVGEYTHFSEDIGSQSRINTVRLETGTRSIFSGGVKFKSGEKLVIDEFYYSPWNYFDARNIKNVEITRKFASSTPENPWGTSKLMFNNLTLGQNAVMDYSQFSNLTIQGDFINNQGTINYLVRGGQVATLNVGNAAAMMFNNDIDSATGFYKPLIKINSAQDLIKNTEHVLLKAKIIGYGNVSTGTNGISNVNLEEQFKERLALYNNNNRMDTCVVRNTDD…
	22023	WP_078216937.1	>22023G:TVVNIFHLNTKADGTLRAGGFKASLSTNAAHLNIGEGGINLSNQASGRTLLVENLTGNITVEGTLRVNNQVGGAAVAGSSANFEFKAGEDTNNATATFNNDIHLGKAVNLRVDAHTAYFNGNIYLGKSTNLRVNGHSAHFKNIDASKSDNGLNTSALDFSGVTDKVNINKLTTSATNVNVKNFDIKELVVTTRVQSFGQYTIFGENIGDKSRIGVVSLQTGYSPAYSGGVTFKSGKNLVIDEIYHAPWNYFDARNVTDVEINKRILFGAPGNIAGKTGLMFNNLTLNSNASMDYGKDLDLTIQRHFTNNQGTMNLFVQDGRVATLNAGHQASMIFNNVVDSATGFYKPLIKINNAQNLTKNKEHVLVKARNIDYNLVGVQGASYDNISASN…
	22046	WP_078297132.1	>22046G:TVVNIDRINTNADGTIRVGGYKASLTTNAAHLHIGKGGVNLSNQASGRSLLVENLTGNITVDGPLRVNNQVGGYALAGSSANFEFKAGTDTKNGTATFNNDISLGRFVNLKVDAHTANFKGIDTGNGGFNTLDFSGVTGKVNINKLITASTNVAVKNFNINELIVKTNGVSVGEYTHFSEDIGSQSHINTVRLETGTRSIFSGGVKFKGGEKLVINEFYYSPWNYFDARNIKNVEITKKFASSTPENPWGTSKLMFNNLTLGQNAVMDYSQFSNLTIQGDFINNQGTINYLVRGGKVATLSVGNAAAMMFNNDIDSATGFYKPLIKINSAQDLIKNTEHVLLKAKIIGYGNVSTGTNGISNVNLEEQFKERLALYNNNNRMDTCVVRNTDD…
	22087	WP_078294889.1	>22087G:TVVNINRINTNADGTIRVGGYKASLTTNAAHLNIGKGGVNLSNQASGRTLLVENLTGNITVDGPLRVNNQVGGYALAGSSANFEFKAGTDTKNGTATFNNDISLGRFVNLRVDAHTANFKGIDTGNGGFNTLDFSGVTGKVNINKLITASTNVAVKNFNINELIVKTNGVSVGEYTHFSEDIGSQSRINTVRLETGTRSIFSGGVKFKSGEKLVINEFYYSPWNYFDARNIKNVEITRKFASSTPENPWGTSKLMFNNLTLGQNAVMDYSQFSNLTIQGDFINNQGTINYLVRGGQVATLNVGNAAAMMFNNDIDSATGFYKPLIKINSAQDLIKNTEHVLLKAKIIGYGNVSTGTNGISNVNLEEQFKERLALYNNNNRMDTCVVRNTDD…
	22093	WP_033585620.1	>22093AG:TVVNINRINTNADGTIRVGGYKASLTTNAAHLHIGKGGINLSNQASGRSLLVENLTGNITVDGPLRVNNQVGGYALAGSSANFEFKAGTDTKNGTATFNNDISLGRFVNLKVDAHTANFKGIDTGNGGFNTLDFSGVTDKVNINKLITASTNVAVKNFNINELIVKTNGVSVGEYTHFSEDIGSQSHINTVRLETGTRSIFSGGVKFKSGEKLVIDEFYYSPWNYFDARNVKNVEITRKFASSTPENPWGTSKLMFNNLTLGQNAVMDYSQFSNLTIQGDFINNQGTINYLVRGGKVATLNVGNAAAMMFNNDIDSTTGFYKPLIKINSAQDLIKNTEHVLLKAKIIGYGNVSTGTNGISNVNLEEQFKERLALYNNNNRMDTCVVRNTD…
	22095	WP_078268579.1	>22095AG:TVVNIDRINTNADGTIKVGGFKASLTTNAAHLHIGKGGVNLSNQASGRSLLVENLTGNITVDGPLRVNNQVGGYALAGSSANFEFKAGTDTKNGTATFNNDISLGRFVNLKVDAHTANFKGIDTGNGGFNTLDFSGVTGKVNINKLITASTNVAVKNFNINELIVKTNGVSVGEYTHFSEDIGSQSRINTVRLETGTRSIFSGGVKFKGGEKLVIDEFYYSPWNYFDARNIKNVEITRKFASSTPENPWGTSKLMFNNLTLGQNAVMDYSQFSNLTIQGDFINNQGTINYLVRGGQVATLNVGNAAAMMFNNDIDSATGFYKPLIKINSAQDLIKNTEHVLLKAKIIGYGNVSTGTNGISNVNLEEQFKERLALYNNNNRMDTCVVRNTD…
	22151	WP_097711231.1	>22151AG:TVVNIDRINTKADGTIKVGGFKASLTTNAAHLHIGKGGVNLSNQASGRTLLVENLTGNITVNGALRVNNQVGGYALAGSSANFEFKAGTDTKNGTATFNNDISLGRFVNLKVDAHTANFKGIDTGNGGFNTLDFSGVTGKVNINKLITASTNVAVKNFNINELIVKTNGVSVGEYTHFSEDIGSQSRINTVRLETGTRSIFSGGVKFKGGEKLVIDEFYYSPWNYFDARNIKNVEITKKFASSTPENPWGTSKLMFNNLTLGQNAVMDYSQFSNLTIQGDFINNQGTINYLVRGGKVATLSVGNAAAMMFNNDIDSATGFYKPLIKINSAQDLIKNTEHVLLKAKIIGYGNVSTGTNGISNVNLEEQFKERLALYNNNNRMDTCVVRNTD…
	22211	WP_097712049.1	>22211AG:TVVNINRINTNADGTIRVGGYKASLTTNAAHLHIGKGGVNLSNQASGRSLLVENLTGNITVEGTLRVNNQVGGAAVAGSSANFEFKAGEDTNNATATFNNDIHLGKAVNLRVDAHTAYFNGNIYLGKSTNLRVNGHSAHFKNIDASKSDNGLNTSALDFSGVTDKVNINKLTTSATNVNVKNFDIKELVVTTRVQSFGQYTIFGENIGDKSRIGVVSLQTGYSPAYSGGVTFKSGKKLVIDEIYHAPWNYFDARNVTDVEINKRILFGAPGNIAGKTGLMFNNLTLNSNASMDYGKDLDLTIQGHFTNNQGTMNLFVQDGRVATLNAGHQASMIFNNLVDSATGFYKPLIKINNAQNLTKNKEHVLVKARNIDYNLVGVQGASYDNISAS…
	22278	WP_097568408.1	>22278G:TVVNINRINTNADGTIRVGGYKASLTTNAAHLHIGKGGINLSNQASGRSLLVENLTGNITVDGPLRVNNQVGGYALAGSSANFEFKAGTDTKNGTATFNNDISLGRFVNLKVDAHTANFKGIDTGNGGFNTLDFSGVTGKVNINKLITASTNVAVKNFNINELIVKTNGVSVGEYTHFSENIGSQSRINTVRLETGTRSIFSGGVKFKGGEKLVIDEFYYSPWNYFDARNIKNVEITRKFASSTPENPWGTSKLMFNNLTLGQNAVMDYSQFSNLTIQGDFINNQGTINYLVRGGQVATLNVGNAAAMMFNNDIDSTTGFYKPLIKINSAQDLIKNTEHVLLKAKIIGYGNVSTGTNGISNVNLEEQFKERLALYNNNNRMDTCVVRNTDD…
	22308	WP_097695813.1	>22308AG:TVVNINRINTNADGTIRVGGYKASLTTNAAHLHIGKGGINLSNQASGRTLLVENLTGNITVDGPLRVNNQVGGYALAGSSANFEFKAGTDTKNGTATFNNDISLGRFVNLKVDAHTANFKGIDTGNGGFNTLDFSGVTGKVNINKLITASTNVAVKNFNINELIVKTNGVSVGEYTHFSEDIGSQSRINTVRLETGTRSIFSGGVKFKSGEKLVIDEFYYSPWNYFDARNIKNVEITRKFASSTPENPWGTSKLMFNNLTLGQNAVMDYSQFSNLTIQGDFINNQGTINYLVRGGQVATLNVGNAAAMMFNNDIDSATGFYKPLIKINSAQDLIKNTEHVLLKAKIIGYGNVSTGTNGISNVNLEEQFKERLALYNNNNRMDTCVVRNTD…
	22311	WP_078259997.1	>22311AG:TVVNIDRINTNADGTIRVGGFKASLTTNAAHLHIGKGGVNLSNQASGRSLLVENLTGNITVDGPLRVNNQVGGAALAGSSANFEFKAGTDTKNGTATFNNDISLGRFVNLKVDAHTANFKGIDTGNGGFNTLDFSGVTGKVNINKLITASTNVAVKNFNINELIVKTNGVSVGEYTHFSEDIGSQSRINTVRLETGTRSIFSGGVKFKSGEKLVIDEFYYSPWNYFDARNIKNVEITRKFASSTPENPWGTSKLMFNNLTLGQNAVMDYSQFSNLTIQGDFINNQGTINYLVRGGQVATLNVGNAAAMMFNNDIDSATGFYKPLIKINSAQDLIKNTEHVLLKAKIIGYGNVSTGTNGISNVNLEEQFKERLALYNNNNRMDTCVVRNTD…
	22312	WP_078241263.1	>22312IM:TVVNINRINTNADGTIRVGGYKASLTTNAAHLNIGKGGVNLSNQASGRTLLVENLTGNITVDGPLRVNNQVGGYALAGSSANFEFKAGTDTNNATATFNNDISLGRFVNLRVDAHTANFKGIDTGNGGFNTLDFSGVTGKVNINKLITASTNVAVKNFNINELIVKTNGVSVGEYTHFSEDIGSQSRINTVRLETGTRSIFSGGVKFKSGEKLVIDEFYYSPWNYFDARNIKNVEITRKFASSTPENPWGTSKLMFNNLTLGQNAVMDYSQFSNLTIQGDFINNQGTINYLVRGGQVATLNVGNAAAMMFNNDIDSATGFYKPLIKINSAQDLIKNTEHVLLKAKIIGYGNVSTGTNGISNVNLEEQFKERLALYNNNNRMDTCVVRNTD…
	22315	WP_097685925.1	>22315AG:TVVNIDRINTNADGTIKVGGFKASLTTNAAHLHIGKGGVNLSNQASGRTLLVENLTGNITVDGPLRVNNQVGGAALAGSSANFEFKAGTDTKNGTATFNNDISLGRFVNLKVDAHTANFKGIDTGNGGFNTLDFSGVTGKVNINKLITASTNVAVKNFNINELIVKTNGVSVGEYTHFSEDIGSQSRINTVRLETGTRSIFSGGVKFKSGEKLVIDEFYYSPWNYFDARNIKNVEITKKFASSTPENPWGTSKLMFNNLTLGQNAVMDYSQFSNLTIQGDFINNQGTINYLVRGGKVATLNVGNAAAMMFNNDIDSATGFYKPLIKINSAQDLIKNTEHVLLKAKIIGYGNVSTGTNGISNVNLEEQFKERLALYNNNNRMDTCVVRNTD…
	22317	WP_097684892.1	>22317G:TVVNIDRINTNADGTIRVGGYKASLTTNAAHLHIGKGGVNLSNQASGRSLLVENLTGNITVDGPLRVNNQVGGYALAGSSANFEFKAGTDTKNGTATFNNDISLGRFVNLKVDAHTANFKGIDTGNGGFNTLDFNGVTGKVNINKLITASTNVAVKNFNINELIVKTNGVSVGEYTHFSENIGSQSRINTVRLETGTRSIFSGGVKFKGGEKLVIDEFYYSPWNYFDARNIKNVEITRKFASSTPENPWGTSKLMFNNLTLGQNAVMDYSQFSNLTIQGDFINNQGTINYLVRGGQVATLNVGNAAAMMFNNDIDSTTGFYKPLIKINSAQDLIKNTEHVLLKAKIIGYGNVSTGTNGISNVNLEEQFKERLALYNNNNRMDTCVVRNTDD…
	22322	WP_078258293.1	>22322AG:TVVNIDRINTNADGTIRVGGYKASLTTNAAHLHIGKGGINLSNQASGRSLLVENLTGNITVDGPLRVNNQVGGYALAGSSANFEFKAGTDTKNGTATFNNDISLGRFVNLKVDAHTANFKGIDTGNGGFNTLDFSGVTGKVNINKLITASTNVAVKNFNINELIVKTNGVSVGEYTHFSEDIGSQSRINTVRLETGTRSIFSGGVKFKSGEKLVIDEFYYSPWNYFDARNIKNVEITRKFASSTPENPWGTSKLMFNNLTLGQNAVMDYSQFSNLTIQGDFINNQGTINYLVRGGQVATLNVGNAAAMMFNNDIDSATGFYKPLIKINSAQDLIKNTEHVLLKAKIIGYGNVSTGTNGISNVNLEEQFKERLALYNNNNRMDTCVVRNTD…
	22327	WP_078215600.1	>22327IM:TVVNIFHLNTKADGTLRAGGFKASLSTNAAHLHIGEGGVNLSNQASGRTLLVENLTGNITVEGTLRVNNQVGGAAVAGSSANFEFKAGEDTNNATATFNNDIHLGKAVNLRVDAHTAYFNGNIYLGKSTNLRVNGHSAHFKNIDASKSDNGLNTSALDFSGVTDKVNINKLTTSATNVNVKNFDIKELVVTTRVQSFGQYTIFGENIGDKSRIGVVSLQTGYSPAYSGGVTFKSGKKLVIDELYHAPWNYFDARNVTDVEINKRILFGAPGNIAGKTGLMFNNLTLNSNASMDYGKDLDLTIQRHFTNNQGTMNLFVQDGRVATLNAGHQASMIFNNLVDSATGFYKPLIKINNAQNLTKNKEHVLVRARNIDYNLVGVQGASYDNISAS…
	22331	WP_078286924.1	>22331IM:TVVNIDRINTKADGTIKVGGFKASLTTNAAHLHIGKGGVNLSNQASGRTLLVENLTGNITVDGPLRVNNQVGGYALAGSSANFEFKAGTDTKNGTATFNNDISLGRFVNLKVDAHTANFKGIDTGNGGFNTLDFSGVTGKVNINKLITASTNVAVKNFNINELIVKTNGVSVGEYTHFSENIGSQSRINTVRLETGTRSIFSGGVKFKGGEKLVIDEFYYSPWNYFDARNIKNVEITRKFASSTPENPWGTSKLMFNNLTLGQNAVMDYSQFSNLTIQGDFINNQGTINYLVRGGKVATLNVGNAAAMMFNNDIDSATGFYKPLIKINSAQDLIKNTEHVLLKAKIIGYGNVSTGTNGISNVNLEEQFKERLALYNNNNRMDTCVVRNTD…
	22335	WP_078279179.1	>22335IM:TVVNIDHINTNADGTIRVGGFKASLTTNAAHLHIGKGGVNLSNQASGRSLLVENLTGNITVDGPLRVNNQVGGAALAGSSANFEFKAGTDTKNGTATFNNDISLGRFVNLKVDAHTANFKGIDTGNGGFNTLDFSGVTGKVNINKLITASTNVAVKNFNINELIVKTNGVSVGEYTHFSEDIGSQSRINTVRLETGTRSIFSGGVKFKSGEKLVIDEFYYSPWNYFDARNIKNVEITRKFASSTPENPWGTSKLMFNNLTLGQNAVMDYSQFSNLTIQGDFINNQGTINYLVRGGKVATLSVGNAAAMMFNNDIDSATGFYKPLIKINSAQDLIKNTEHVLLKAKIIGYGNVSTGTNGISNVNLEEQFKERLALYNNNNRMDTCVVRNTD…
	22336	WP_078279179.1	>22336AG:TVVNIDRINTNADGTIRVGGYKASLTTNAAHLHIGKGGINLSNQASGRSLLVENLTGNITVDGPLRVNNQVGGYALAGSSANFEFKAGTDTKNGTATFNNDISLGRFVNLKVDAHTANFKGIDTGNGGFNTLDFSGVTGKVNINKLITASTNVAVKNFNINELIVKTNGVSVGEYTHFSENIGSQSRINTVRLETGTRSIFSGGVKFKGGEKLVIDEFYYSPWNYFDARNIKNVEITRKFASSTPENPWGTSKLMFNNLTLGQNAVMDYSQFSNLTIQGDFINNQGTINYLVRGGQVATLNVGNAAAMMFNNDIDSTTGFYKPLIKINSAQDLIKNTEHVLLKAKIIGYGNVSTGTNGISNVNLEEQFKERLALYNNNNRMDTCVVRNTD…
	22341	WP_078257043.1	>22341G:TVVNINRINTNADGTIRVGGYKASLTTNAAHLHIGKGGVNLSNQASGRSLLVENLTGNITVDGALRVNNQVGGYALAGSSANFEFKAGTDTKNGTATFNNDISLGRFVNLKVDAHTANFKGIDTGNGGFNTLDFSGVTDKVNINKLITASTNVAAKNFNINELIVKTNGVSVGEYTYFSEDIGSQSRINTVRLETGTRSIYSGGVKFKGGEKLVINDFYYAPWNYFDARNIKNVEITNKLAFGPQGSPWGTSKLMFNNLTLGQNAVMDYSQFSNLTIQGDFINNQGTINYLVRGGQVATLNVGNAAAMMFNNDIDSATGFYKPLIKINSAQDLIKNTEHVLLKAKIIGYGNVSTGTNGISNVNLEEQFKERLALYNNNNRMDTCVVRNTDD…
	22346	WP_078243497.1	>22346IM:TVVNIDRINTKADGTIKVGGFKASLTTNAAHLHIGKGGVNLSNQASGRTLLVENLTGNITVDGPLRVNNQVGGYALAGSSANFEFKAGTDTKNGTATFNNDISLGRFVNLKVDAHTANFKGIDTGNGGFNTLDFSGVTGKVNINKLITASTNVAVKNFNINELIVKTNGVSVGEYTHFSENIGSQSRINTVRLETGTRSIFSGGVKFKGGEKLVIDEFYYSPWNYFDARNIKNVEITRKFASSTPENPWGTSKLMFNNLTLGQNAVMDYSQFSNLTIQGDFINNQGTINYLVRGGQVATLNVGNAAAMMFNNDIDSATGFYKPLIKINSAQDLIKNTEHVLLKAKIIGYGNVSTGTNGISNVNLEEQFKERLALYNNNNRMDTCVVRNTD…
	22347	WP_097548513.1	>22347G:TVVNINRINTNADGTIRVGGYKASLTTNAAHLHIGKGGVNLSNQASGRSLLVENLTGNITVDGPLRVNNQVGGAALAGSSANFEFKAGTDTKNGTATFNNDISLGRFVNLKVDAHTANFKGIDTGNGGFNTLDFSGVTGKVNINKLITASTNVAVKNFNINELIVKTNGVSVGEYTHFSEDIGSQSRINTVRLETGTRSIFSGGVKFKGGEKLVIDEFYYSPWNYFDARNIKNVEITRKFASSTPENPWGTSKLMFNNLTLGQNAVMDYSQFSNLTIQGDFINNQGTINYLVRGGKVATLNVGNAAAMMFNNDIDSATGFYKPLIKINSAQDLIKNTEHVLVKAKIIGYGNVSTGTNGISNVNLEEQFKERLALYNNNNRMDTCVVRNTDD…
	22351	WP_097698072.1	>22351G:TVVNIDRINTNADGTIRVGGYKASLTTNAAHLHIGKGGVNLSNQASGRTLLVENLTGNITVDGPLRVNNQVGGYALAGSSANFEFKAGTDTKNGTATFNNDISLGRFVNLRVDAHTANFKGIDTGNGGFNTLDFSGVTGKVNINKLITASTNVAVKNFNINELIVKTNGVSVGEYTHFSEDIGSQSRINTVRLETGTRSIFSGGVKFKSGEKLVINEFYYSPWNYFDARNIKNVEITRKFASSTPENPWGTSKLMFNNLTLGQNAVMDYSQFSNLTIQGDFINNQGTINYLVRGGQVATLNVGNAAAMMFNNDIDSATGFYKPLIKINSAQDLIKNTEHVLLKAKIIGYGNVSTGTNGISNVNLEEQFKERLALYNNNNRMDTCVVRNTDD…
	22352	WP_097640207.1	>22352IM:TVVNIDRINTNADGTIRVGGYKASLTTNAAHLHIGKGGINLSNQASGRSLLVENLTGNITVDGPLRVNNQVGGYALAGSSANFEFKAGTDTKNGTATFNNDISLGRFVNLKVDAHTANFKGIDTGNGGFNTLDFSGVTGKVNINKLITASTNVAVKNFNINELIVKTNGVSVGEYTHFSENIGSQSRINTVRLETGTRSIFSGGVKFKGGEKLVIDEFYYSPWNYFDARNIKNVEITRKFASSTPENPWGTSKLMFNNLTLGQNAVMDYSQFSNLTIQGDFINNQGTINYLVRGGQVATLNVGNAAAMMFNNDIDSATGFYKPLMKINSAQDLIKNTEHVLLKAKIIGYGNVSTGTNGISNVNLEEQFKERLALYNNNNRMDTCVVRNTD…
	22360	WP_078263449.1	>22360AG:TVVNIDRINTNADGTIRVGGFKASLTTNAAHLHIGKGGINLSNQASGRSLLVENLTGNITVEGTLRVNNQVGGAAVAGSSANFEFKAGEDTNNATATFNNDIHLGKAVNLRVDAHTAYFNGNIYLGKSTNLRVNGHSAHFKNIDASKSDNGLNTSALDFSGVTDKVNINKLTTSATNVNIKNFDIKELVVTTRVQSFGQYTIFGENIGDKSRIGVVSLQTGYSPAYSGGVTFKSGKKLVIDEIYHAPWNYFDARNITDVEVNKRILFGAPGNIAGKTGLMFNNLTLNSNASMDYGKDLDLTIQGHFTNNQGTMNLFVQDGRVATLNAGHQASMIFNNLVDSATGFYKPLIKINNAQNLTKNKEHVLVKARNIDYNLVGVQGASYDNISAS…
	22362	WP_078283518.1	>22362G:TVVNIDRINTNADGTIRVGGYKASLTTNAAHLHIGKGGINLSNQASGRSLLVENLTGNITVDGPLRVNNQVGGYALAGSSANFEFKAGTDTKNGTATFNNDISLGRFVNLKVDAHTANFKGIDTGNGGFNTLDFSGVTGKVNINKLITASTNVAVKNFNINELIVKTNGVSVGEYTHFSENIGSQSRINTVRLETGTRSIFSGGVKFKGGEKLVIDEFYYSPWNYFDARNIKNVEITRKFASSTPENPWGTSKLMFNNLTLGQNAVMDYSQFSNLTIQGDFINNQGTINYLVRGGQVATLNVGNAAAMMFNNDIDSATGFYKPLMKINSAQDLIKNTEHVLLKAKIIGYGNVSTGTNGISNVNLEEQFKERLALYNNNNRMDTCVVRNTDD…
	22366	WP_078291006.1	>22366G:TVVNINRINTNADGTIRVGGYKASLTTNAAHLHIGKGGINLSNQASGRSLLVENLTGNITVEGTLRVNNQVGGAAVAGSSANFEFKAGEDTNNATATFNNDIHLGKAVNLRVDAHTAYFNGNIYLGKSTNLRVNGHSAHFKNIDASKSDNGLNTSALDFSGVTDKVNINKLTTSATNVNVKNFDIKELVVTTRVQSFGQYTIFGENIGDKSRIGVVSLQTGYSPAYSGVTFKSGKKLVIDEIYHAPWNYFDARNVTDVEINKRILFGAPGNIAGKTGLMFNNLTLNSNASMDYGKDLDLTIQGHFTNNQGTMNLFVQDGRVATLNAGHQASMIFNNLVDSATGFYKPLIKVNNAQNLTKNKEHVLVKARNIDYNLVGVQGASYDNISASNT…
	22367	WP_078260536.1	>22367IM:TVVNIDRINTKADGTIKVGGFKASLTTNAAHLHIGKGGVNLSNQASGRTLLVENLTGNITVDGPLRVNNQVGGYALAGSSANFEFKAGTDTKNGTATFNNDISLGRFVNLKVDAHTANFKGIDTGNGGFNTLDFSGVTGKVNINKLITASTNVAVKNFNINELIVKTNGVSVGEYTHFSENIGSQSRINTVRLETGTRSIFSGGVKFKGGEKLVIDEFYYSPWNYFDARNIKNVEITRKFASSTPENPWGTSKLMFNNLTLGQNAVMDYSQFSNLTIQGDFINNQGTINYLVRGGQVATLNVGNAAAMMFNNDIDSTTGFYKPLIKINSAQDLIKNTEHVLLKAKIIGYGNVSTGTNGISNVNLEEQFKERLALYNNNNRMDTCVVRNTD…
	22368	WP_078272171.1	>22368G:TVVNIDRINTKADGTIKVGGFKASLTTNAAHLHIGKGGVNLSNQASGRTLLVENLTGNITVDGPLRVNNQVGGYALAGSSANFEFKAGTDTKNGTATFNNDISLGRFVNLKVDAHTANFKGIDTGNGGFNTLDFSGVTGKVNINKLITASTNVAVKNFNINELIVKTNGVSVGEYTHFSEDIGSQSRINTVRLETGTRSIFSGGVKFKSGEKLVIDEFYYSPWNYFDARNIKNVEITRKFASSTPENPWGTSKLMFNNLTLGQNAVMDYSQFSNLTIQGDFINNQGTINYLVRGGQVATLNVGNAAAMMFNNDIDSATGFYKPLIKINSAQDLIKNTEHVLLKAKIIGYGNVSTGTNGISNVNLEEQFKERLALYNNNNRMDTCVVRNTDD…
	22370	WP_078293636.1	>22370G:TVVNIDRINTKADGTIKVGGFKASLTTNAAHLHIGKGGVNLSNQASGRTLLVENLTGNITVDGPLRVNNQVGGYALAGSSANFEFKAGTDTKNGTATFNNDISLGRFVNLKVDAHTANFKGIDTGNGGFNTLDFSGVTGKVNINKLITASTNVAVKNFNINELIVKTNGVSVGEYTHFSENIGSQSRINTVRLETGTRSIFSGGVKFKGGEKLVIDEFYYSPWNYFDARNIKNVEITRKFASSTPENPWGTSKLMFNNLTLGQNAVMDYSQFSNLTIQGDFINNQGTINYLVRGGQVATLNVGNAAAMMFNNDIDSATGFYKPLIKINSAQDLIKNTEHVLLKAKIIGYGNVSTGTNGISNVNLEEQFKERLALYNNNNRMDTCVVRNTDD…
	22371	WP_078261252.1	>22371G:TVVNIDRINTKADGTIKVGGYKASLTTNAAHLNIGKGGVNLSNQASGRTLLVENLTGNITVDGPLRVNNQVGGYALAGSSANFEFKAGVDTKNGTATFNNDISLGRFVNLKVDAHTANFKGIDTGNGGFNTLDFSGVTGKVNINKLITASTNVAVKNFNINELIVKTNGISVGEYTHFSEDIGSQSRINTVRLETGTRSIFSGGVKFKSGEKLVIDEFYYSPWNYFDARNVKNVEITRKFASSTPENPWGTSKLMFNNLTLGQNAVMDYSQFSNLTIQGDFINNQGTINYLVRGGQVATLNVGNAAAMMFNNDIDSATGFYKPLIKINSAQDLIKNTEHVLLKAKIIGYGNVSTGTNGISNVNLEEQFKERLALYNNNNRMDTCVVRNTDD…
	22377	WP_097694518.1	>22377G:TVVNIDRINTNADGTIRVGGYKASLTTNAAHLHIGKGGVNLSNQASGRSLLVENLTGNITVDGPLRVNNQVGGYALAGSSANFEFKAGTDTKNGTATFNNDISLGRFVNLKVDAHTANFKGIDTGNGGFNTLDFSGVTGKVNINKLITASTNVAVKNFNINELIVKTNGVSVGEYTHFSEDIGSQSRINTVRLETGTRSIFSGGVKFKSGEKLVIDEFYYSPWNYFDARNIKNVEITRKFASSTPENPWGTSKLMFNNLTLGQNAVMDYSQFSNLTIQGDFINNQGTINYLVRGGQVATLNVGNAAAMMFNNDIDSATGFYKPLIKINSAQDLIKNTEHVLLKAKIIGYGNVSTGTNGISNVNLEEQFKERLALYNNNNRMDTCVVRNTDD…
	22378	WP_078248858.1	>22378G:TVVNINRINTNADGTIRVGGYKASLTTNAAHLHIGKGGINLSNQASGRSLLVENLTGNITVDGPLRVNNQVGGYALAGSSANFEFKAGTDTKNGTATFNNDISLGRFVNLKVDAHTANFKGIDTGNGGFNTLDFSGVTGKVNINKLITASTNVAVKNFNINELIVKTNGVSVGEYTHFSEDIGSQSRINTVRLETGTRSIFSGGVKFKSGEKLVIDEFYYSPWNYFDARNIKNVEITRKFASSTPENPWGTSKLMFNNLTLGQNAVMDYSQFSNLTIQGDFINNQGTINYLVRGGQVATLNVGNAAAMMFNNDIDSATGFYKPLIKINSAQDLIKNTEHVLLKAKIIGYGNVSTGTNGISNVNLEEQFKERLALYNNNNRMDTCVVRNTDD…
	22385	WP_078270647.1	>22385G:TVVNIDRINTNADGTIRVGGFKASLTTNAAHLHIGKGGVNLSNQASGRSLLVENLTGNITVDGPLRVNNQVGGAALAGSSANFEFKAGTDTKNGTATFNNDISLGRFVNLKVDAHTANFKGIDTGNGGFNTLDFSGVTGKVNINKLITASTNVAVKNFNINELIVKTNGVSVGEYTHFSEDIGSQSRINTVRLETGTRSIFSGGVKFKSGEKLVIDEFYYSPWNYFDARNIKNVEITRKFASSTPENPWGTSKLMFNNLTLGQNAVMDYSQFSNLTIQGDFINNQGTINYLVRGGQVATLNVGNAAAMMFNNDIDSATGFYKPLIKINSAQDLIKNTEHVLLKAKIIGYGNVSTGTNGISNVNLEEQFKERLALYNNNNRMDTCVVRNTDD…
	22386	WP_097690831.1	>22386IM:TVVNIFHLNTKADGTLRAGGFKASLSTNAAHLNIGEGGVNLSNQASGRSLLVENLTGNITVEGTLRVNNQVGGAAVAGSSANFEFKAGEDTNNATATFNNDIHLGKAVNLRVDAHTAYFNGNIYLGKSTNLRVNGHSAHFKNIDASKSDNGLNTSALDFSGVTDKVNINKLTTSATNVNIKNFDIKELVVTTRVQSFGQYTIFGENIGDKSRIGVVSLQTGYSPAYSGGVTFKSGKKLVIDEIYHAPWNYFDARNVTDVEINKRILFGAPGNIAGKTGLMFNNLTLNSNASMDYGKDLDLTIQGHFTNNQGTMNLFVQDGRVATLNAGHQASMIFNNVVDSATGFYKPLIKINNAQNLTKNKEHVLVKARNIDYNLVGVQGASYDNISAS…
	22389	WP_078269251.1	>22389IM:TVVNIFHLNTKADGTLRAGGFKASLSTNAAHLHIGEGGVNLSNQASGRSLLVENLTGNITVEGTLRVNNQVGGAAVAGSSANFEFKAGEDTNNATATFNNDIHLGKAVNLRVDAHTAYFNGNIYLGKSTNLRVNGHSAHFKNIDASKSDNGLNTSALDFSGVTDKVNINKLTTSATNVNVKNFDIKELVVTTRVQSFGQYTIFGENIGDKSRIGVVSLQTGYSPAYSGGVTFKSGKKLVIDEIYHAPWNYFDARNVTDVEINKRILFGAPGNIAGKTGLMFNNLTLNSNASMDYGKDLDLTIQGHFTNNQGTMNLFVQDGRVATLNAGHQASMIFNNLVDNATGFYKPLIKVNNAQNLTKNKEHVLVKARNIDYNLVGVQGASYDNISAS…
	22390	WP_078302384.1	>22390IM:TVVNINRINTNADGTIRVGGYKASLTTNAAHLHIGKGGINLSNQASGRSLLVENLTGNITVDGPLRVNNQVGGYALAGSSANFEFKAGTDTKNGTATFNTIFSLGRFVNLKVDAHTANFKGIDTGNGGFNTLDFSGVTGKVNINKLITASTNVAVKNFNINELIVKTNGVSVGEYTHFSENIGSQSRINTVRLETGTRSIFSGGVKFKGGEKLVINEFYYSPWNYFDARNIKNVEITRKFASSTPENPWGTSKLMFNNLTLGQNAVMDYSQFSNLTIQGDFINNQGTINYLVRGGQVATLNVGNAAAMMFNNDIDSTTGFYKPLIKINSAQDLIKNTEHVLLKAKIIGYGNVSTGTNGISNVNLEEQFKERLALYNNNNRMDTCVVRNTD…
	22402	WP_078245243.1	>22402AG:TVVNIDRINTKADGTIKVGGYKASLTTNAAHLNIGKGGVNLSNQASGRTLLVENLTGNITVDGPLRVNNQVGGYALAGSSANFEFKAGTDTKNGTATFNNDISLGRFVNLKVDAHTANFKGIDTGNGGFNTLDFSGVTGKVNINKLITASTNVAAKNFNINELIVKTNGVSVGEYTYFSEDIGSQSRINTVRLETGTRSIFSGGVKFKGGEKLVIDEFYYSPWNYFDARNIKNVEITRKFASSTPENPWGTSKLMFNNLTLGQNAVMDYSQFSNLTIQGDFINNQGTINYLVRGGQVATLNVGNAAAMMFNNDIDSATGFYKPLMKINSAQDLIKNTEHVLLKAKIIGYGNVSTGTNGISNVNLEEQFKERLALYNNNNRMDTCVVRNTD…
	24004	WP_078244410.1	>24004G:TVVNINRINTNADGTIRVGGYKASLTTNAAHLHIGKGGINLSNQASGRSLLVENLTGNITVDGPLRVNNQVGGYALAGSSANFEFKAGTDTKNGTATFNNDISLGRFVNLKVDAHTANFKGIDTGNGGFNTLDFSGVTDKVNINKLITASTNVAVKNFNINELIVKTNGISVGEYTHFSEDIGSQSRINTVRLETGTRSIFSGGVKFKSGEKLVIDEFYYSPWNYFDARNVKNVEITRKFASSTPENPWGTSKLMFNNLTLGQNAVMDYSQFSNLTIQGDFINNQGTINYLVRGGKVATLNVGNAAAMMFNNDIDSATGFYKPLIKINSAQDLIKNTEHVLLKAKIIGYGNVSTGTNGISNVNLEEQFKERLALYNNNNRMDTCVVRNTDD…
	24012	WP_097551703.1	>24012G:TVVNINRINTNADGTIRVGGYKASLTTNAAHLNIGKGGVNLSNQASGRTLLVENLTGNITVDGPLRVNNQVGGYALAGSSANFEFKAGTDTKNGTATFNNDISLGRFVNLKVDAHTANFKGIDTGNGGFNTLDFSGVTDKVNINKLITASTNVAVKNFNINELIVKTNGVSVGEYTHFSEDIGSQSRINTVRLETGTRSIFSGGVKFKGGEKLVIDEFYYSPWNYFDARNIKNVEITRKFASSTPENPWGTSKLMFNNLTLGQNAVMDYSQFSNLTIQGDFINNQGTINYLVRGGKVATLNVGNAAAMMFNNDIDSATGFYKPLIKINSAQDLIKNTEHVLLKAKIIGYGNVSTGTNGISNVNLEEQFKERLALYNNNNRMDTCVVRNTDD…
	24013	WP_097683632.1	>24013AG:TVVNIFHLNTKADGTLRAGGFKASLSTNAAHLHIGEGGVNLSNQASGRSLLVENLTGNITVEGTLRVNNQVGGAAVAGSSANFEFKAGEDTNNATATFNNDIHLGKAVNLRVDAHTAYFNGNIYLGKSTNLRVNGHSAHFKNIDASKSDNGLNTSALDFSGVTDKVNINKLTTSATNVNVKNFDIKELVVTTRVQSFGQYTIFGENIGDKSRIGVVSLQTGYSPAYSGGVTFKSGKKLVIDEIYHAPWNYFDARNVTDVEVNKRILFGAPGNIAGKTGLMFNNLTLNSNASMDYGKDLDLTIQGHFTNNQGTMNLFVQDGRVATLNAGHQASMIFNNLVDSATGFYKPLIKINNAQNLTKNKEHVLVKARNIDYNLVGVQGASYDSISAS…
	26024	WP_078265947.1	>26024IM:TVVNIDRINTNADGTIRVGGYKASLTTNAAHLHIGKGGVNLSNQASGRSLLVENLTGNITVDGPLRVNNQVGGYALAGSSANFEFKAGTDTKNGTATFNNDISLGRFVNLKVDAHTANFKGIDTGNGGFNTLDFSGVTGKVNINKLITASTNVAVKNFNINELIVKTNGVSVGEYTHFSEDIGSQSRINTVRLETGTRSIFSGGVKFKGGEKLVINEFYYSPWNYFDARNIKNVEITRKFASSTPENPWGTSKLMFNNLTLGQNAVMDYSQFSNLTIQGDFINNQGTINYLVRGGQVATLNVGNAAAMMFNNDIDSTTGFYKPLIKINSAQDLIKNTEHVLLKAKIIGYGNVSTGTNGISNVNLEEQFKERLALYNNNNRMDTCVVRNTD…
	26083	WP_097563194.1	>26083GA:TVVNIDRINTNADGTIRVGGYKASLTTNAAHLHIGKGGVNLSNQASGRSLLVENLTGNITVDGPLRVNNQVGGYALAGSSANFEFKAGTDTKNGTATFNNDISLGRFVNLKVDAHTANFKGIDTGNGGFNTLDFSGVTGKVNINKLITASTNVAVKNFNINELIVKTNGVSVGEYTHFSEDIGSQSRINTVRLETGTRSIFSGGVKFKSGEKLVIDEFYYSPWNYFDARNIKNVEITRKFASSTPENPWGTSKLMFNNLTLGQNAVMDYSQFSNLTIQGDFINNQGTINYLVRGGKVATLSVGNAAAMMFNNDIDSATGFYKPLIKINSAQDLIKNTEHVLLKAKIIGYGNVSTGTNGISNVNLEEQFKERLALYNNNNRMDTCVVRNTD…
	26084	WP_078247298.1	>26084GA:TVVNIDRINTNADGTIRVGGYKASLTTNAAHLHIGKGGVNLSNQASGRSLLVENLTGNITVDGPLRVNNQVGGYALAGSSANFEFKAGTDTKNGTATFNNDISLGRFVNLKVDAHTANFKGIDTGNGGFNTLDFSGVTDKVNINKLITASTNVAVKNFNINELIVKTNGISVGEYTHFSEDIGSQSRINTVRLETGTRSIFSGGVKFKSGEKLVIDEFYYSPWNYFDARNIKNVEITRKFASSTPENPWGTSKLMFNNLTLGQNAVMDYSQFSNLTIQGDFINNQGTINYLVRGGKVATLNVGNAAAMMFNNDIDSATGFYKPLIKINSAQDLIKNTEHVLLKAKIIGYGNVSTGTNGISNVNLEEQFKERLALYNNNNRMDTCVVRNTD…
	26093	WP_078266429.1	>26093GA:TVVNINRINTNADGTIRVGGYKASLTTNAAHLHIGKGGVNLSNQASGRTLLVENLTGNITVDGPLRVNNQVGGYALAGSSANFEFKAGTDTKNGTATFNNDISLGRFVNLKVDAHTANFKGIDTGNGGFNTLDFSGVTGKVNINKLITASTNVAVKNFNINELIVKTNGVSVGEYTHFSENIGSQSRINTVRLETGTRSIFSGGVKFKGGEKLVIDEFYYSPWNYFDARNIKNVEITRKFASSTPENPWGTSKLMFNNLTLGQNAVMDYSQFSNLTIQGDFINNQGTINYLVRGGQVATLNVGNAAAMMFNNDIDSTTGFYKPLIKINSAQDLIKNTEHVLLKAKIIGYGNVSTGTNGISNVNLEEQFKERLALYNNNNRMDTCVVRNTD…
	26100	WP_097697570.1	>26100IM:TVVNINRINTNADGTIRVGGYKASLTTNAAHLNIGKGGVNLSNQASGRSLLVENLTGNITVDGPLRVNNQVGGYALAGSSANFEFKAGTDTKNGTATFNNDISLGRFVNLKVDAHTANFKGIDTGNGGFNTLDFSGVTDKVNINKLITASTNVAVKNFNINELIVKTNGISVGEYTHFSEDIGSQSRINTVRLETGTRSIFSGGVKFKGGEKLVINDFYYAPWNYFDARNIKNVEITNKLAFGPQGSPWGTAKLMFNNLTLGQNAVMDYSQFSNLTIQGDFINNQGTINYLVRGGQVATLSVGNAAAMMFNNDIDSATGFYKPLIKINSAQDLIKNTEHVLLKAKIIGYXNVSTGTNGISNVNLEEQFKERLALYNNNNRMDTCVVRNTD…
	A033	WP_097707603.1	>A033IM:TVVNIDRINTNADGTIRVGGYKASLTTNAAHLHIGKGGVNLSNQASGRSLLVENLTGNITVDGPLRVNNQVGGYALAGSNANFEFKAGTDTKNGTATFNNDISLGRFVNLKVDAHTANFKGIDTGNGGFNTLDFSGVTDKVNINKLITASTNVAVKNFNINELIVKTNGVSVGEYTHFSEDIGSQSRINTVRLETGTRSIFSGGVKFKSGEKLVINEFYYSPWNYFDARNVKNVEITRKFASSTPENPWGTSKLMFNNLTLGQNAVMDYSQFSNLTIQGDFINNQGTINYLVRGGKVATLNVGNAAAMMFNNDIDSATGFYKPLIKINSAQDLIKNTEHVLLKAKIIGYGNVSTGTNSISNVNLEEQFKERLALYNNNNRMDTCVVRNTDD…
	A037	WP_097686801.1	>A037G:TVVNIDRINTKADGTIKVGGFKASLTTNAAHLNIGKGGVNLSNQASGRTLLVENLTGNITVDGPLRVNNQVGGAALAGSSANFEFKAGTDTKNGTATFNNDISLGRFVNLKVDAHTANFKGIDTGNGGFNTLDFSGVTGKVNINKLITASTNVAVKNFNINELIVKTNGVSVGEYTHFSEDIGSQSRINTVRLETGTRSIFSGGVKFKSGEKLVIDEFYYSPWNYFDARNIKNVEITRKFASSTPENPWGTSKLMFNNLTLGQNAIMDYSQFSNLTIQGDFINNQGTINYLVRGGQVATLNVGNAAAMMFSNDIDSATGFYKPLIKINSAQDLIKNTEHVLLKAKIIGYGNVSTGTNGISNVNLEEQFKERLALYNNNNRMDTCVVRNTDDI…
	A039	WP_097706057.1	>A039IM:TVVNIFHLNTKADGTLKAGGFKASLSTNAAHLNIGEGGINLSNQASGRSLLVENLTGNITVEGTLRVNNQVGGAAVAGSSANFEFKAGEDTNNATATFNNDIHLGKAVNLRVDAHTAYFNGNIYLGKSTNLRVNGHSAHFKNIDASKSDNGLNTSALDFSGVTDKVNINKLTTSATNVNVKNFDIKELVVTTRVQSFGQYTIFGENIGDKSRIGVVSLQTGYSPAYSGGVTFKSGKKLVIDEIYHAPWNYFDARNVTDVEINKRILFGAPGNIAGKTGLMFNNLTLNSNASMDYGKDLDLTIQRHFTNNQGTMNLFVQDGRVATLNAGHQASMIFNNVVDSATGFYKPLIKINNAQNLTKNKEHVLVKARNIDYNLVGVQGTSYDNISASN…
	A077	WP_097682463.1	>A077G:TVVNIDRINTKADGTIKVGGFKASLTTNAAHLHIGKGGVNLSNQASGRTLLVENLTGNITVDGPLRVNNQVGGYALAGSSANFEFKAGTDTKNGTATFNNDISLGRFVNLKVDAHTANFKGIDTGNGGFNTLDFSGVTGKVNINKLITASTNVAVKNFNINELIVKTNGVSVGEYTHFSENIGSQSRINTVRLETGTRSIFSGGVKFKGGEKLVIDEFYYSPWNYFDARNIKNVEITRKFASSTPENPWGTSKLMFNNLTLGQNAVMDYSQFSNLTIQGDFINNQGTINYLVRGGQVATLNVGNAAAMMFNNDIDSATGFYKPLIKINSAQDLIKNTEHVLLKAKIIGYGNVSTGTNGISNVNLEEQFKERLALYNNNNRMDTCVVRNTDDI…
	A02	Genome sequence uppon request	>A02G:TVVNIFHLNTKADGTLRAGGFKASLSTNAAHLNIGEGGVNLSNQASGRSLLVENLTGNITVEGTLRVNNQVGGAAVAGSSANFEFKAGEDTNNATATFNNDIHLGKAVNLRVDAHTAYFNGNIYLGKSTNLRVNGHSAHFKNIDASKSDNGLNTSALDFSGVTDKVNINKLTTSATNVNIKNFDIKELVVTTRVQSFGQYTIFGENIGDKSRIGVVSLQTGYSPAYSGGVTFKSGKKLVIDEIYHAPWNYFDARNVTDVEINKRILFGAPGNIAGKTGLMFNNLTLNSNASMDYGKDLDLTIQRHFTNNQGTMNLFVQDGRVATLNAGHQASMIFNNVVDSATGFYKPLIKVNNAQNLTKNKEHVLVKARNIDYNLVGVQGASYDNISASNTN…
	22388G	Genome sequence uppon request	>22388G:TVVNIDRINTNADGTIRVGGYKASLTTNAAHLHIGKGGVNLSNQASGRTLLVENLTGNITVDGPLRVNNQVGGYALAGSSANFEFKAGTDTKNGTATFNNDISLGRFVNLKVDAHTANFKGIDTGNGGFNTLDFSGVTGKVNINKLITASTNVAVKNFNINELIVKTNGVSVGEYTHFSENIGSQSRINTVRLETGTRSIFSGGVKFKGGEKLVIDEFYYSPWNYFDARNIKNVEITRKFASSTPENPWGTSKLMFNNLTLGQNAVMDYSQFSNLTIQGDFINNQGTINYLVRGGKVATLNVGNAAAMMFNNDIDSATGFYKPLIKINSAQDLIKNTEHVLLKAKIIGYGNVSTGTSGISNVNLEEQFKERLALYNNNNRMDTCVVRNTDD…
	22391	Genome sequence uppon request	>22391AG:TVVNINRINTNADGTIRVGGYKASLTTNAAHLHIGKGGINLSNQASGRSLLVENLTGNITVDGPLRVNNQVGGYALAGSSANFEFKAGTDTKNGTATFNNDISLGRFVNLKVDAHTANFKGIDTGNGGFNTLDFSGVTGKVNINKLITASTNVAVKNFNINELIVKTNGVSVGEYTHFSEDIGSQSRINTVRLETGTRSIFSGGVKFKGGEKLVIDEFYYSPWNYFDARNIKNVEITRKFASSTPENPWGTSKLMFNNLTLGQNAVMDYSQFSNLTIQGDFINNQGTINYLVRDGKVATLNVGNAAAMMFNNDIDSATGFYKPLIKINSAQDLIKNTEHVLLKAKIIGYGNVSTGTNGISNVNLEEQFKERLALYNNNNRMDTCVVRNTD…
	26096	Genome sequence uppon request	>26096AG:TVVNIDRINTKADGTIRVGGYKASLTTNAAHLNIGKGGVNLSNQASGRTLLVENLTGNITVNGPLRVNNQVGGYALAGSSANFEFKAGTDTKNGTATFNNDISLGRFVNLKVDAHTANFKGIDTGNGGFNTLDFSGVTGKVNINKLITASTNVAVKNFNINELIVKTNGVSVGEYTHFSEDIGSQSRINTVRLETGTRSIFSGGVKFKSGEKLVIDEFYYSPWNYFDARNIKNVEITRKFASSTPENPWGTSKLMFNNLTLGQNAVMDYSQFSNLTIQGDFINNQGTINYLVRGGQVATLNVGNAAAMMFNNDIDSATGFYKPLIKINSAQDLIKNTEHVLLKAKIIGYGNVSTGTNGISNVNLEEQFKERLALYNNNNRMDTCVVRNTD…
	22345	Genome sequence uppon request	>22345IM:TVVNIDRINTNADGTIRVGGYKASLTTNAAHLHXGKGGVNLSNQASGRSXLVENLTGNITVDGPLRVNNQVGGYALAGSSANFEFKAGTDTKNGTATFNNDISLGRFVNLKVDAHTANFKGIDTGNGGFNTLDFSGVTGKVNINKLITASTNVAVKNFNINELIVKTNGVSVGEYTHFSEDIGSQSRINTVRLETGTRSIYSGGVKFKSGEKLVINDFYYAPWNYFDARNIKNVEITNKLAFGPQGSPWGTSKLMFNNLTLGQNAVMDYSQFSNLTIQGDFINNQGTINYLVRGGQVATLNVGNAAAMMFNNDIDSATGFYKPLIKINSAQDLIKNTEHVLLKAKIIGYGNVSTGTNGISNVNLEEQFKERLALYNNNNRMDTCVVRNTD…
	22355	Genome sequence uppon request	>22355IM:TVVNINRINTNADGTIRVGGYKASLTTNAAHLHIGKGGINLSNQASGRSLLVENLTGNITVDGALRVNNQVGGYALAGSSANFEFKAGTDTKNGTATFNNDISLGRFVNLKVDAHTANFKGIDTGNGGFNTLDFSGVTDKVNINKLITASTNVAAKNFNINELIVKTNGVSVGEYTHFSEDIGSQSRINTVRLETGTRSIFSGGVKFKSGEKLVINEFYYSPWNYFDARNVKNVEITRKFASSTPENPWGTSKLMFNNLTLGQNAVMDYSQFSNLTIQGDFINNQGTINYLVRGGKVATLNVGNAAAMMFNNDIDSATGFYKPLIKINSAQDLIKNTEHVLVKAKIIGYGNVSTGTNGISNVNLEEQFKERLALYNNNNRMDTCVVRNTD…
	1071	Genome sequence uppon request	>1071GA:TVVNINRINTNADGTIRVGGYKASLTTNAAHLHIGKGGVNLSNQASGRTLLVENLTGNITVDGPLRVNNQVGGYALAGSSANFEFKAGTDTKNGTATFNNDISLGRFVNLKVDAHTANFKGIDTGNGGFNTLDFSGVTDKVNINKLITASTNVAAKNFNINELIVKTNGVSVGEYTHFSEDIGSQSRINTVRLETGTRSIFSGGVKFKGGEKLVIDEFYYSPWNYFDARNIKNVEITRKFASSTPENPWGTSKLMFNNLTLGQNAVMDYSQFSNLTIQGDFINNQGTINYLVRGGKVATLNVGNAAAMMFNNDIDSATGFYKPLIKINSAQDLIKNTEHVLLKAKIIGYGNVSTGTNGISNVNLEEQFKERLALYNNNNRMDTCVVRNTDD…
	1002	Genome sequence uppon request	>1002GA:TVVNIDRINTNADGTIRVGGYKASLTTNAAHLHIGKGGVNLSNQASGRSLLVENLTGNITVDGPLRVNNQVGGYALAGSSANFEFKAGTDTKNGTATFNNDISLGRFVNLKVDAHTANFKGIDTGNGGFNTLDFSGVTGKVNINKLITASTNVAVKNFNINELIVKTNGVSVGEYTHFSEDIGSQSRINTVRLETGTRSIFSGGVKFKGGEKLVIDEFYYSPWNYFDARNIKNVEITRKFASSTPENPWGTSKLMFNNLTLGQNAVMDYSQFSNLTIQGDFINNQGTINYLVRGGKVATLNVGNAAAMMFNNDIDSATGFYKPLMKINSAQDLIKNTEHVLLKAKIIGYGNVSTGTNGISNVNLEEQFKERLALYNNNNRMDTCVVRNTDD…
	1057	Genome sequence uppon request	>1057GA:TVVNINRINTNADGTIRVGGYKASLTTNAAHLHIGKGGINLSNQASGRSLLVENLTGNITVDGPLRVNNQVGGYALAGSSANFEFKAGTDTKNGTATFNNDISLGRFVNLKVDAHTANFKGIDTGNGGFNTLDFSGVTGKVNINKLITASTNVAVKNFNINELIVKTNGVSVGEYTHFSEDIGSQSRINTVRLETGTRSIFSGGVKFKSGEKLVIDEFYYSPWNYFDARNIKNVEITKKFASSTPENPWGTSKLMFNNLTLGQNAVMDYSQFSNLTIQGDFINNQGTINYLVRGGKVATLSVGNAAAMMFNNDIDSATGFYKPLIKINSAQDLIKNTEHVLLKAKIIGYGNVSTGTNGISNVNLEEQFKERLALYNNNNRMDTCVVRNTDD…
	1088	Genome sequence uppon request	>1088GA:TVVNIDRINTKADGTIKVGGYKASLTTNAAHLHIGKGGVNLSNQASGRTLLVENLTGNITVDGPLRVNNQVGGYALAGSSANFEFKAGTDTKNGTATFNNDISLGRFVNLKVDAHTANFKGIDTGNGGFNTLDFSGVTGKVNINKLITASTNVAAKNFNINELIVKTNGVSVGEYTHFSEDIGSQSRINTVRLETGTRSIFSGGVKFKSGEKLVIDEFYYSPWNYFDARNIKNVEITRKFASSTPENPWGTSKLMFNNLTLGQNAIMDYSQFSNLTIQGDFINNQGTINYLVRGGQVATLNVGNAAAMMFNNDIDSATGFYKPLIKINSAQDLIKNTEHVLLKAKIIGYGNVSTGTNGISNVNLEEQFKERLALYNNNNRMDTCVVRNTDD…
	1097	Genome sequence uppon request	>1097GA:TVVNINRINTNANGTIKVGGYKASLTTNAAHLNIGKGGVNLSNQASGRSLLVENLTGNITVDGPLRVNNQVGGYALAGSSANFEFKAGTDTKNGTATFNNDISLGRFVNLKVDAHTANFKGIDTGNGGFNTLDFSGVTDKVNINKLITASTNVAVKNFXINELIVKTNGVXVGEYTHFSEDIGSQSRINTVRLETGTRSIFSGGVKFKGGEKLVIDEFYYSPWNYFDARNIKNVEITRKFASSTPENPWGTSKLMFNNLTLGQNAVMDYSQFSNLTIQGDFINNQGTINYLVRGGXVATLNVGNAAAMMFNNDIDSATGFYKPLIKINSAQDLIKNTEHVLVKAKIIGYGNVSTGTNGISNVNLEEQFKERLALYNNNNRMDTCVVRNTDD…
