# Supplementary material for: Molecular evolution of the VacA p55 binding domain of Helicobacter pylori in mestizos from a high gastric cancer region of Colombia
Source: PeerJ. 2019 May 6;7:e6634. doi: 10.7717/peerj.6634 (PMC6507892; doi:10.7717/peerj.6634)
Supplement: Table S2 — In the Table S2, the positions 261 and 321 in p55 were highlighted in blue, the positions mentioned in the Table 2 were presented in green and those corresponding to the Table 3 in red. [file peerj-07-6634-s002.xlsx]

## Sheet: Sequence Data
Alignment
Positions										1	1	1	1	1	1	1	1	1	1	2	2	2	2	2	2	2	2	2	2	3	3	3	3	3	3	3	3	3	3	4	4	4	4	4	4	4	4	4	4
	1	2	3	4	5	6	7	8	9	0	1	2	3	4	5	6	7	8	9	0	1	2	3	4	5	6	7	8	9	0	1	2	3	4	5	6	7	8	9	0	1	2	3	4	5	6	7	8	9
3053AG	T	V	V	N	I	F	H	L	N	T	K	A	D	G	T	L	R	A	G	G	F	K	A	S	L	S	T	N	A	A	H	L	N	I	G	E	G	G	V	N	L	S	N	Q	A	S	G	R	T
22360AG	T	V	V	N	I	D	R	I	N	T	N	A	D	G	T	I	R	V	G	G	F	K	A	S	L	T	T	N	A	A	H	L	H	I	G	K	G	G	I	N	L	S	N	Q	A	S	G	R	S
3133AG	T	V	V	N	I	D	R	I	N	T	N	A	D	G	T	I	R	V	G	G	F	K	A	S	L	T	T	N	A	A	H	L	H	I	G	K	G	G	V	N	L	S	N	Q	A	S	G	R	S
22366G	T	V	V	N	I	N	R	I	N	T	N	A	D	G	T	I	R	V	G	G	Y	K	A	S	L	T	T	N	A	A	H	L	H	I	G	K	G	G	I	N	L	S	N	Q	A	S	G	R	S
22211AG	T	V	V	N	I	N	R	I	N	T	N	A	D	G	T	I	R	V	G	G	Y	K	A	S	L	T	T	N	A	A	H	L	H	I	G	K	G	G	V	N	L	S	N	Q	A	S	G	R	S
3076AG	T	V	V	N	I	F	H	L	N	T	K	A	D	G	T	L	K	A	G	G	F	K	A	S	L	S	T	N	A	A	H	L	N	I	G	E	G	G	I	N	L	S	N	Q	A	S	G	R	S
22389IMDU	T	V	V	N	I	F	H	L	N	T	K	A	D	G	T	L	R	A	G	G	F	K	A	S	L	S	T	N	A	A	H	L	H	I	G	E	G	G	V	N	L	S	N	Q	A	S	G	R	S
24013AG	T	V	V	N	I	F	H	L	N	T	K	A	D	G	T	L	R	A	G	G	F	K	A	S	L	S	T	N	A	A	H	L	H	I	G	E	G	G	V	N	L	S	N	Q	A	S	G	R	S
22386IM	T	V	V	N	I	F	H	L	N	T	K	A	D	G	T	L	R	A	G	G	F	K	A	S	L	S	T	N	A	A	H	L	N	I	G	E	G	G	V	N	L	S	N	Q	A	S	G	R	S
2020G	T	V	V	N	I	F	H	L	N	T	K	A	D	G	T	L	R	A	G	G	F	K	A	S	L	S	T	N	A	A	H	L	N	I	G	E	G	G	V	N	L	S	N	Q	A	S	G	R	S
A02GDU	T	V	V	N	I	F	H	L	N	T	K	A	D	G	T	L	R	A	G	G	F	K	A	S	L	S	T	N	A	A	H	L	N	I	G	E	G	G	V	N	L	S	N	Q	A	S	G	R	S
3136G	T	V	V	N	I	F	H	L	N	T	K	A	D	G	T	L	R	A	G	G	F	K	A	S	L	S	T	N	A	A	H	L	N	I	G	E	G	G	V	N	L	S	N	Q	A	S	G	R	S
22020IM	T	V	V	N	I	F	H	L	N	T	K	A	D	G	T	I	R	A	G	G	F	K	A	S	L	S	T	N	A	A	H	L	N	I	G	E	G	G	V	N	L	S	N	Q	A	S	G	R	S
A039IM	T	V	V	N	I	F	H	L	N	T	K	A	D	G	T	L	K	A	G	G	F	K	A	S	L	S	T	N	A	A	H	L	N	I	G	E	G	G	I	N	L	S	N	Q	A	S	G	R	S
22327IM	T	V	V	N	I	F	H	L	N	T	K	A	D	G	T	L	R	A	G	G	F	K	A	S	L	S	T	N	A	A	H	L	H	I	G	E	G	G	V	N	L	S	N	Q	A	S	G	R	T
2015G	T	V	V	N	I	F	H	L	N	T	K	A	D	G	T	L	R	A	G	G	F	K	A	S	L	S	T	N	A	A	H	L	H	I	G	E	G	G	I	N	L	S	N	Q	A	S	G	R	T
22023G	T	V	V	N	I	F	H	L	N	T	K	A	D	G	T	L	R	A	G	G	F	K	A	S	L	S	T	N	A	A	H	L	N	I	G	E	G	G	I	N	L	S	N	Q	A	S	G	R	T
26100IM	T	V	V	N	I	N	R	I	N	T	N	A	D	G	T	I	R	V	G	G	Y	K	A	S	L	T	T	N	A	A	H	L	N	I	G	K	G	G	V	N	L	S	N	Q	A	S	G	R	S
22345IM	T	V	V	N	I	D	R	I	N	T	N	A	D	G	T	I	R	V	G	G	Y	K	A	S	L	T	T	N	A	A	H	L	H	X	G	K	G	G	V	N	L	S	N	Q	A	S	G	R	S
22341G	T	V	V	N	I	N	R	I	N	T	N	A	D	G	T	I	R	V	G	G	Y	K	A	S	L	T	T	N	A	A	H	L	H	I	G	K	G	G	V	N	L	S	N	Q	A	S	G	R	S
3118AG	T	V	V	N	I	D	R	I	N	T	K	A	D	G	T	I	R	V	G	G	Y	K	A	S	L	T	T	N	A	A	H	L	H	I	G	K	G	G	V	N	L	S	N	Q	A	S	G	R	S
3033G	T	V	V	N	I	D	R	I	N	T	K	A	D	G	T	I	R	V	G	G	Y	K	A	S	L	T	T	N	A	A	H	L	H	I	G	K	G	G	V	N	L	S	N	Q	A	S	G	R	S
2010IM	T	V	V	N	I	D	R	I	N	T	K	A	D	G	T	I	R	V	G	G	Y	K	A	S	L	T	T	N	A	A	H	L	H	I	G	K	G	G	V	N	L	S	N	Q	A	S	G	R	S
22378G	T	V	V	N	I	N	R	I	N	T	N	A	D	G	T	I	R	V	G	G	Y	K	A	S	L	T	T	N	A	A	H	L	H	I	G	K	G	G	I	N	L	S	N	Q	A	S	G	R	S
1097IGA	T	V	V	N	I	N	R	I	N	T	N	A	N	G	T	I	K	V	G	G	Y	K	A	S	L	T	T	N	A	A	H	L	N	I	G	K	G	G	V	N	L	S	N	Q	A	S	G	R	S
A037GDU	T	V	V	N	I	D	R	I	N	T	K	A	D	G	T	I	K	V	G	G	F	K	A	S	L	T	T	N	A	A	H	L	N	I	G	K	G	G	V	N	L	S	N	Q	A	S	G	R	T
22355IM	T	V	V	N	I	N	R	I	N	T	N	A	D	G	T	I	R	V	G	G	Y	K	A	S	L	T	T	N	A	A	H	L	H	I	G	K	G	G	I	N	L	S	N	Q	A	S	G	R	S
2065G	T	V	V	N	I	D	R	I	N	T	K	A	D	G	T	I	R	V	G	G	Y	K	A	S	L	T	T	N	A	A	H	L	H	I	G	K	G	G	V	N	L	S	N	Q	A	S	G	R	S
1086DGA	T	V	V	N	I	D	R	I	N	T	K	A	D	G	T	I	R	V	G	G	Y	K	A	S	L	T	T	N	A	A	H	L	H	I	G	K	G	G	I	N	L	S	N	Q	A	S	G	R	S
22151AG	T	V	V	N	I	D	R	I	N	T	K	A	D	G	T	I	K	V	G	G	F	K	A	S	L	T	T	N	A	A	H	L	H	I	G	K	G	G	V	N	L	S	N	Q	A	S	G	R	T
2007IM	T	V	V	N	I	N	R	I	N	T	N	A	D	G	T	I	R	V	G	G	Y	K	A	S	L	T	T	N	A	A	H	L	H	I	G	K	G	G	I	N	L	S	N	Q	A	S	G	R	S
A033IM	T	V	V	N	I	D	R	I	N	T	N	A	D	G	T	I	R	V	G	G	Y	K	A	S	L	T	T	N	A	A	H	L	H	I	G	K	G	G	V	N	L	S	N	Q	A	S	G	R	S
22402AG	T	V	V	N	I	D	R	I	N	T	K	A	D	G	T	I	K	V	G	G	Y	K	A	S	L	T	T	N	A	A	H	L	N	I	G	K	G	G	V	N	L	S	N	Q	A	S	G	R	T
3046G	T	V	V	N	I	D	R	I	N	T	N	A	D	G	T	I	R	V	G	G	F	K	A	S	L	T	T	N	A	A	H	L	H	I	G	K	G	G	V	N	L	S	N	Q	A	S	G	R	S
22093AG	T	V	V	N	I	N	R	I	N	T	N	A	D	G	T	I	R	V	G	G	Y	K	A	S	L	T	T	N	A	A	H	L	H	I	G	K	G	G	I	N	L	S	N	Q	A	S	G	R	S
22003IM	T	V	V	N	I	N	R	I	N	T	N	A	D	G	T	I	R	V	G	G	Y	K	A	S	L	T	T	N	A	A	H	L	H	I	G	K	G	G	I	N	L	S	N	Q	A	S	G	R	S
24004G	T	V	V	N	I	N	R	I	N	T	N	A	D	G	T	I	R	V	G	G	Y	K	A	S	L	T	T	N	A	A	H	L	H	I	G	K	G	G	I	N	L	S	N	Q	A	S	G	R	S
3026IM	T	V	V	N	I	D	R	I	N	T	K	A	D	G	T	I	K	V	G	G	Y	K	A	S	L	T	T	N	A	A	H	L	H	I	G	K	G	G	V	N	L	S	N	Q	A	S	G	R	T
2036AG	T	V	V	N	I	D	R	I	N	T	K	A	D	G	T	I	R	V	G	G	Y	K	A	S	L	T	T	N	A	A	H	L	H	I	G	K	G	G	V	N	L	S	N	Q	A	S	G	R	T
22391AG	T	V	V	N	I	N	R	I	N	T	N	A	D	G	T	I	R	V	G	G	Y	K	A	S	L	T	T	N	A	A	H	L	H	I	G	K	G	G	I	N	L	S	N	Q	A	S	G	R	S
22315AG	T	V	V	N	I	D	R	I	N	T	N	A	D	G	T	I	K	V	G	G	F	K	A	S	L	T	T	N	A	A	H	L	H	I	G	K	G	G	V	N	L	S	N	Q	A	S	G	R	T
22347G	T	V	V	N	I	N	R	I	N	T	N	A	D	G	T	I	R	V	G	G	Y	K	A	S	L	T	T	N	A	A	H	L	H	I	G	K	G	G	V	N	L	S	N	Q	A	S	G	R	S
22335IM	T	V	V	N	I	D	H	I	N	T	N	A	D	G	T	I	R	V	G	G	F	K	A	S	L	T	T	N	A	A	H	L	H	I	G	K	G	G	V	N	L	S	N	Q	A	S	G	R	S
22312IM	T	V	V	N	I	N	R	I	N	T	N	A	D	G	T	I	R	V	G	G	Y	K	A	S	L	T	T	N	A	A	H	L	N	I	G	K	G	G	V	N	L	S	N	Q	A	S	G	R	T
1088IGA	T	V	V	N	I	D	R	I	N	T	K	A	D	G	T	I	K	V	G	G	Y	K	A	S	L	T	T	N	A	A	H	L	H	I	G	K	G	G	V	N	L	S	N	Q	A	S	G	R	T
22390IMDU	T	V	V	N	I	N	R	I	N	T	N	A	D	G	T	I	R	V	G	G	Y	K	A	S	L	T	T	N	A	A	H	L	H	I	G	K	G	G	I	N	L	S	N	Q	A	S	G	R	S
2029IM	T	V	V	N	I	D	R	I	N	T	K	A	D	G	T	I	K	V	G	G	Y	K	A	S	L	T	T	N	A	A	H	L	N	I	G	K	G	G	V	N	L	S	N	Q	A	S	G	R	T
1061DGA	T	V	V	N	I	D	R	I	N	T	K	A	D	G	T	I	K	V	G	G	F	K	A	S	L	T	T	N	A	A	H	L	H	I	G	K	G	G	V	N	L	S	N	Q	A	S	G	R	T
3125AG	T	V	V	N	I	D	R	I	N	T	K	A	D	G	T	I	K	V	G	G	F	K	A	S	L	T	T	N	A	A	H	L	N	I	G	K	G	G	V	N	L	S	N	Q	A	S	G	R	T
22371G	T	V	V	N	I	D	R	I	N	T	K	A	D	G	T	I	K	V	G	G	Y	K	A	S	L	T	T	N	A	A	H	L	N	I	G	K	G	G	V	N	L	S	N	Q	A	S	G	R	T
2047IM	T	V	V	N	I	D	R	I	N	T	K	A	D	G	T	I	K	V	G	G	F	K	A	S	L	T	T	N	A	A	H	L	H	I	G	K	G	G	V	N	L	S	N	Q	A	S	G	R	T
22368G	T	V	V	N	I	D	R	I	N	T	K	A	D	G	T	I	K	V	G	G	F	K	A	S	L	T	T	N	A	A	H	L	H	I	G	K	G	G	V	N	L	S	N	Q	A	S	G	R	T
22346IM	T	V	V	N	I	D	R	I	N	T	K	A	D	G	T	I	K	V	G	G	F	K	A	S	L	T	T	N	A	A	H	L	H	I	G	K	G	G	V	N	L	S	N	Q	A	S	G	R	T
22331IM	T	V	V	N	I	D	R	I	N	T	K	A	D	G	T	I	K	V	G	G	F	K	A	S	L	T	T	N	A	A	H	L	H	I	G	K	G	G	V	N	L	S	N	Q	A	S	G	R	T
A077G	T	V	V	N	I	D	R	I	N	T	K	A	D	G	T	I	K	V	G	G	F	K	A	S	L	T	T	N	A	A	H	L	H	I	G	K	G	G	V	N	L	S	N	Q	A	S	G	R	T
22367IM	T	V	V	N	I	D	R	I	N	T	K	A	D	G	T	I	K	V	G	G	F	K	A	S	L	T	T	N	A	A	H	L	H	I	G	K	G	G	V	N	L	S	N	Q	A	S	G	R	T
1081DGA	T	V	V	N	I	D	R	I	N	T	K	A	D	G	T	I	K	V	G	G	F	K	A	S	L	T	T	N	A	A	H	L	H	I	G	K	G	G	V	N	L	S	N	Q	A	S	G	R	T
22370G	T	V	V	N	I	D	R	I	N	T	K	A	D	G	T	I	K	V	G	G	F	K	A	S	L	T	T	N	A	A	H	L	H	I	G	K	G	G	V	N	L	S	N	Q	A	S	G	R	T
22388G	T	V	V	N	I	D	R	I	N	T	N	A	D	G	T	I	R	V	G	G	Y	K	A	S	L	T	T	N	A	A	H	L	H	I	G	K	G	G	V	N	L	S	N	Q	A	S	G	R	T
26024IM	T	V	V	N	I	D	R	I	N	T	N	A	D	G	T	I	R	V	G	G	Y	K	A	S	L	T	T	N	A	A	H	L	H	I	G	K	G	G	V	N	L	S	N	Q	A	S	G	R	S
22317G	T	V	V	N	I	D	R	I	N	T	N	A	D	G	T	I	R	V	G	G	Y	K	A	S	L	T	T	N	A	A	H	L	H	I	G	K	G	G	V	N	L	S	N	Q	A	S	G	R	S
22278GDU	T	V	V	N	I	N	R	I	N	T	N	A	D	G	T	I	R	V	G	G	Y	K	A	S	L	T	T	N	A	A	H	L	H	I	G	K	G	G	I	N	L	S	N	Q	A	S	G	R	S
26093IGA	T	V	V	N	I	N	R	I	N	T	N	A	D	G	T	I	R	V	G	G	Y	K	A	S	L	T	T	N	A	A	H	L	H	I	G	K	G	G	V	N	L	S	N	Q	A	S	G	R	T
3120AG	T	V	V	N	I	D	R	I	N	T	N	A	D	G	T	I	R	V	G	G	Y	K	A	S	L	T	T	N	A	A	H	L	H	I	G	K	G	G	V	N	L	S	N	Q	A	S	G	R	T
1071MGA	T	V	V	N	I	N	R	I	N	T	N	A	D	G	T	I	R	V	G	G	Y	K	A	S	L	T	T	N	A	A	H	L	H	I	G	K	G	G	V	N	L	S	N	Q	A	S	G	R	T
24012G	T	V	V	N	I	N	R	I	N	T	N	A	D	G	T	I	R	V	G	G	Y	K	A	S	L	T	T	N	A	A	H	L	N	I	G	K	G	G	V	N	L	S	N	Q	A	S	G	R	T
1059IGA	T	V	V	N	I	D	R	I	N	T	N	A	D	G	T	I	R	V	G	G	Y	K	A	S	L	T	T	N	A	A	H	L	H	I	G	K	G	G	V	N	L	S	N	Q	A	S	G	R	T
22046G	T	V	V	N	I	D	R	I	N	T	N	A	D	G	T	I	R	V	G	G	Y	K	A	S	L	T	T	N	A	A	H	L	H	I	G	K	G	G	V	N	L	S	N	Q	A	S	G	R	S
22019AG	T	V	V	N	I	N	R	I	N	T	N	A	D	G	T	I	R	V	G	G	Y	K	A	S	L	T	T	N	A	A	H	L	H	I	G	K	G	G	V	N	L	S	N	Q	A	S	G	R	S
1093DGA	T	V	V	N	I	N	R	I	N	T	N	A	D	G	T	I	R	V	G	G	Y	K	A	S	L	T	T	N	A	A	H	L	N	I	G	K	G	G	V	N	L	S	N	Q	A	S	G	R	T
1039IGA	T	V	V	N	I	N	R	I	N	T	N	A	D	G	T	I	R	V	G	G	Y	K	A	S	L	T	T	N	A	A	H	L	H	I	G	K	G	G	V	N	L	S	N	Q	A	S	G	R	S
26084DGA	T	V	V	N	I	D	R	I	N	T	N	A	D	G	T	I	R	V	G	G	Y	K	A	S	L	T	T	N	A	A	H	L	H	I	G	K	G	G	V	N	L	S	N	Q	A	S	G	R	S
22377G	T	V	V	N	I	D	R	I	N	T	N	A	D	G	T	I	R	V	G	G	Y	K	A	S	L	T	T	N	A	A	H	L	H	I	G	K	G	G	V	N	L	S	N	Q	A	S	G	R	S
22087G	T	V	V	N	I	N	R	I	N	T	N	A	D	G	T	I	R	V	G	G	Y	K	A	S	L	T	T	N	A	A	H	L	N	I	G	K	G	G	V	N	L	S	N	Q	A	S	G	R	T
2040AG	T	V	V	N	I	D	R	I	N	T	N	A	D	G	T	I	R	V	G	G	Y	K	A	S	L	T	T	N	A	A	H	L	H	I	G	K	G	G	V	N	L	S	N	Q	A	S	G	R	S
1057IGA	T	V	V	N	I	N	R	I	N	T	N	A	D	G	T	I	R	V	G	G	Y	K	A	S	L	T	T	N	A	A	H	L	H	I	G	K	G	G	I	N	L	S	N	Q	A	S	G	R	S
3056AG	T	V	V	N	I	D	R	I	N	T	N	A	D	G	T	I	R	V	G	G	Y	K	A	S	L	T	T	N	A	A	H	L	H	I	G	K	G	G	V	N	L	S	N	Q	A	S	G	R	S
3004IM	T	V	V	N	I	D	R	I	N	T	N	A	D	G	T	I	R	V	G	G	Y	K	A	S	L	T	T	N	A	A	H	L	H	I	G	K	G	G	V	N	L	S	N	Q	A	S	G	R	S
2027IM	T	V	V	N	I	D	R	I	N	T	N	A	D	G	T	I	R	V	G	G	Y	K	A	S	L	T	T	N	A	A	H	L	H	I	G	K	G	G	V	N	L	S	N	Q	A	S	G	R	S
22095AG	T	V	V	N	I	D	R	I	N	T	N	A	D	G	T	I	K	V	G	G	F	K	A	S	L	T	T	N	A	A	H	L	H	I	G	K	G	G	V	N	L	S	N	Q	A	S	G	R	S
22311AG	T	V	V	N	I	D	R	I	N	T	N	A	D	G	T	I	R	V	G	G	F	K	A	S	L	T	T	N	A	A	H	L	H	I	G	K	G	G	V	N	L	S	N	Q	A	S	G	R	S
22385G	T	V	V	N	I	D	R	I	N	T	N	A	D	G	T	I	R	V	G	G	F	K	A	S	L	T	T	N	A	A	H	L	H	I	G	K	G	G	V	N	L	S	N	Q	A	S	G	R	S
2021IM	T	V	V	N	I	D	R	I	N	T	N	A	D	G	T	I	R	V	G	G	F	K	A	S	L	T	T	N	A	A	H	L	H	I	G	K	G	G	V	N	L	S	N	Q	A	S	G	R	S
3096AG	T	V	V	N	I	D	R	I	N	T	N	A	D	G	T	I	R	V	G	G	F	K	A	S	L	T	T	N	A	A	H	L	H	I	G	K	G	G	V	N	L	S	N	Q	A	S	G	R	S
22351GDU	T	V	V	N	I	D	R	I	N	T	N	A	D	G	T	I	R	V	G	G	Y	K	A	S	L	T	T	N	A	A	H	L	H	I	G	K	G	G	V	N	L	S	N	Q	A	S	G	R	T
2025G	T	V	V	N	I	D	R	I	N	T	N	A	D	G	T	I	R	V	G	G	Y	K	A	S	L	T	T	N	A	A	H	L	H	I	G	K	G	G	V	N	L	S	N	Q	A	S	G	R	S
26083IGA	T	V	V	N	I	D	R	I	N	T	N	A	D	G	T	I	R	V	G	G	Y	K	A	S	L	T	T	N	A	A	H	L	H	I	G	K	G	G	V	N	L	S	N	Q	A	S	G	R	S
3029G	T	V	V	N	I	D	R	I	N	T	N	A	D	G	T	I	R	V	G	G	Y	K	A	S	L	T	T	N	A	A	H	L	H	I	G	K	G	G	V	N	L	S	N	Q	A	S	G	R	S
22308AG	T	V	V	N	I	N	R	I	N	T	N	A	D	G	T	I	R	V	G	G	Y	K	A	S	L	T	T	N	A	A	H	L	H	I	G	K	G	G	I	N	L	S	N	Q	A	S	G	R	T
22021G	T	V	V	N	I	D	R	I	N	T	N	A	D	G	T	I	R	V	G	G	Y	K	A	S	L	T	T	N	A	A	H	L	H	I	G	K	G	G	V	N	L	S	N	Q	A	S	G	R	S
22322AG	T	V	V	N	I	D	R	I	N	T	N	A	D	G	T	I	R	V	G	G	Y	K	A	S	L	T	T	N	A	A	H	L	H	I	G	K	G	G	I	N	L	S	N	Q	A	S	G	R	S
1002IGA	T	V	V	N	I	D	R	I	N	T	N	A	D	G	T	I	R	V	G	G	Y	K	A	S	L	T	T	N	A	A	H	L	H	I	G	K	G	G	V	N	L	S	N	Q	A	S	G	R	S
1102IGA	T	V	V	N	I	D	R	I	N	T	N	A	D	G	T	I	R	V	G	G	Y	K	A	S	L	T	T	N	A	A	H	L	H	I	G	K	G	G	V	N	L	S	N	Q	A	S	G	R	S
2061AG	T	V	V	N	I	D	R	I	N	T	N	A	D	G	T	I	R	V	G	G	Y	K	A	S	L	T	T	N	A	A	H	L	H	I	G	K	G	G	V	N	L	S	N	Q	A	S	G	R	S
22336AG	T	V	V	N	I	D	R	I	N	T	N	A	D	G	T	I	R	V	G	G	Y	K	A	S	L	T	T	N	A	A	H	L	H	I	G	K	G	G	I	N	L	S	N	Q	A	S	G	R	S
22362G	T	V	V	N	I	D	R	I	N	T	N	A	D	G	T	I	R	V	G	G	Y	K	A	S	L	T	T	N	A	A	H	L	H	I	G	K	G	G	I	N	L	S	N	Q	A	S	G	R	S
22352IM	T	V	V	N	I	D	R	I	N	T	N	A	D	G	T	I	R	V	G	G	Y	K	A	S	L	T	T	N	A	A	H	L	H	I	G	K	G	G	I	N	L	S	N	Q	A	S	G	R	S
22013AG	T	V	V	N	I	D	R	I	N	T	N	A	D	G	T	I	R	V	G	G	F	K	A	S	L	T	T	N	A	A	H	L	H	I	G	K	G	G	V	N	L	S	N	Q	A	S	G	R	S
1095IGA	T	V	V	N	I	D	R	I	N	T	K	A	D	G	T	I	R	V	G	G	Y	K	A	S	L	T	T	N	A	A	H	L	H	I	G	K	G	G	V	N	L	S	N	Q	A	S	G	R	S
1077IGA	T	V	V	N	I	N	R	I	N	T	N	A	D	G	T	I	R	V	G	G	Y	K	A	S	L	T	T	N	A	A	H	L	H	I	G	K	G	G	I	N	L	S	N	Q	A	S	G	R	S
Alignment	2	2	2	2	2	2	2	2	2	2	2	2	2	2	2	2	2	2	2	2	2	2	2	2	2	2	2	2	2	2	2	2	2	2	2	2	2	2	2	2	2	2	2	2	2	2	2	2	2
Positions	5	5	5	5	5	5	5	5	5	6	6	6	6	6	6	6	6	6	6	7	7	7	7	7	7	7	7	7	7	8	8	8	8	8	8	8	8	8	8	9	9	9	9	9	9	9	9	9	9
	1	2	3	4	5	6	7	8	9	0	1	2	3	4	5	6	7	8	9	0	1	2	3	4	5	6	7	8	9	0	1	2	3	4	5	6	7	8	9	0	1	2	3	4	5	6	7	8	9
3053AG	F	D	A	R	N	I	T	D	V	E	V	N	K	R	I	L	F	G	A	P	G	N	I	A	G	K	T	G	L	M	F	N	N	L	T	L	N	S	N	A	S	M	D	Y	G	K	D	L	D
22360AG	F	D	A	R	N	I	T	D	V	E	V	N	K	R	I	L	F	G	A	P	G	N	I	A	G	K	T	G	L	M	F	N	N	L	T	L	N	S	N	A	S	M	D	Y	G	K	D	L	D
3133AG	F	D	A	R	N	V	T	D	V	E	V	N	K	R	I	L	F	G	A	P	G	N	I	A	G	K	T	G	L	M	F	N	N	L	T	L	N	S	N	A	S	M	D	Y	G	K	D	L	D
22366G	F	D	A	R	N	V	T	D	V	E	I	N	K	R	I	L	F	G	A	P	G	N	I	A	G	K	T	G	L	M	F	N	N	L	T	L	N	S	N	A	S	M	D	Y	G	K	D	L	D
22211AG	F	D	A	R	N	V	T	D	V	E	I	N	K	R	I	L	F	G	A	P	G	N	I	A	G	K	T	G	L	M	F	N	N	L	T	L	N	S	N	A	S	M	D	Y	G	K	D	L	D
3076AG	F	D	A	R	N	I	T	D	V	E	V	N	K	R	I	L	F	G	A	P	G	N	I	A	G	K	T	G	L	M	F	N	N	L	T	L	N	S	N	A	S	M	D	Y	G	K	D	L	D
22389IMDU	F	D	A	R	N	V	T	D	V	E	I	N	K	R	I	L	F	G	A	P	G	N	I	A	G	K	T	G	L	M	F	N	N	L	T	L	N	S	N	A	S	M	D	Y	G	K	D	L	D
24013AG	F	D	A	R	N	V	T	D	V	E	V	N	K	R	I	L	F	G	A	P	G	N	I	A	G	K	T	G	L	M	F	N	N	L	T	L	N	S	N	A	S	M	D	Y	G	K	D	L	D
22386IM	F	D	A	R	N	V	T	D	V	E	I	N	K	R	I	L	F	G	A	P	G	N	I	A	G	K	T	G	L	M	F	N	N	L	T	L	N	S	N	A	S	M	D	Y	G	K	D	L	D
2020G	F	D	A	R	N	V	T	D	V	E	I	N	K	R	I	L	F	G	A	P	G	N	I	A	G	K	T	G	L	M	F	N	N	L	T	L	N	S	N	A	S	M	D	Y	G	K	D	L	D
A02GDU	F	D	A	R	N	V	T	D	V	E	I	N	K	R	I	L	F	G	A	P	G	N	I	A	G	K	T	G	L	M	F	N	N	L	T	L	N	S	N	A	S	M	D	Y	G	K	D	L	D
3136G	F	D	A	R	N	V	T	D	V	E	I	N	K	R	I	L	F	G	A	P	G	N	I	A	G	K	T	G	L	M	F	N	N	L	T	L	N	S	N	A	S	M	D	Y	G	K	D	L	D
22020IM	F	D	A	R	N	V	T	D	V	E	I	N	K	R	I	L	F	G	A	P	G	N	I	A	G	K	T	G	L	M	F	N	N	L	T	L	N	S	N	A	S	M	D	Y	G	K	D	L	D
A039IM	F	D	A	R	N	V	T	D	V	E	I	N	K	R	I	L	F	G	A	P	G	N	I	A	G	K	T	G	L	M	F	N	N	L	T	L	N	S	N	A	S	M	D	Y	G	K	D	L	D
22327IM	F	D	A	R	N	V	T	D	V	E	I	N	K	R	I	L	F	G	A	P	G	N	I	A	G	K	T	G	L	M	F	N	N	L	T	L	N	S	N	A	S	M	D	Y	G	K	D	L	D
2015G	F	D	A	R	N	V	T	D	V	E	I	N	K	R	I	L	F	G	A	P	G	N	I	A	G	K	T	G	L	M	F	N	N	L	T	L	N	S	N	A	S	M	D	Y	G	K	D	L	D
22023G	F	D	A	R	N	V	T	D	V	E	I	N	K	R	I	L	F	G	A	P	G	N	I	A	G	K	T	G	L	M	F	N	N	L	T	L	N	S	N	A	S	M	D	Y	G	K	D	L	D
26100IM	F	D	A	R	N	I	K	N	V	E	I	T	N	K	L	A	F	G	P	Q	G	S	P	W	G	T	A	K	L	M	F	N	N	L	T	L	G	Q	N	A	V	M	D	Y	S	Q	F	S	N
22345IM	F	D	A	R	N	I	K	N	V	E	I	T	N	K	L	A	F	G	P	Q	G	S	P	W	G	T	S	K	L	M	F	N	N	L	T	L	G	Q	N	A	V	M	D	Y	S	Q	F	S	N
22341G	F	D	A	R	N	I	K	N	V	E	I	T	N	K	L	A	F	G	P	Q	G	S	P	W	G	T	S	K	L	M	F	N	N	L	T	L	G	Q	N	A	V	M	D	Y	S	Q	F	S	N
3118AG	F	D	A	R	N	I	K	N	V	E	I	T	N	K	L	A	F	G	P	Q	G	S	P	W	G	T	S	K	L	M	F	N	N	L	T	L	G	Q	N	A	V	M	D	Y	S	Q	F	S	N
3033G	F	D	A	R	N	I	K	N	V	E	I	T	N	K	L	A	F	G	P	Q	G	S	P	W	G	T	S	K	L	M	F	N	N	L	T	L	G	Q	N	A	V	M	D	Y	S	Q	F	S	N
2010IM	F	D	A	R	N	I	K	N	V	E	I	T	N	K	L	A	F	G	P	Q	G	S	P	W	G	T	S	K	L	M	F	N	N	L	T	L	G	Q	N	A	V	M	D	Y	S	Q	F	S	N
22378G	F	D	A	R	N	I	K	N	V	E	I	T	R	K	F	A	S	S	T	P	E	N	P	W	G	T	S	K	L	M	F	N	N	L	T	L	G	Q	N	A	V	M	D	Y	S	Q	F	S	N
1097IGA	F	D	A	R	N	I	K	N	V	E	I	T	R	K	F	A	S	S	T	P	E	N	P	W	G	T	S	K	L	M	F	N	N	L	T	L	G	Q	N	A	V	M	D	Y	S	Q	F	S	N
A037GDU	F	D	A	R	N	I	K	N	V	E	I	T	R	K	F	A	S	S	T	P	E	N	P	W	G	T	S	K	L	M	F	N	N	L	T	L	G	Q	N	A	I	M	D	Y	S	Q	F	S	N
22355IM	F	D	A	R	N	V	K	N	V	E	I	T	R	K	F	A	S	S	T	P	E	N	P	W	G	T	S	K	L	M	F	N	N	L	T	L	G	Q	N	A	V	M	D	Y	S	Q	F	S	N
2065G	F	D	A	R	N	V	K	N	V	E	I	T	R	K	F	A	S	S	T	P	E	N	P	W	G	T	S	K	L	M	F	N	N	L	T	L	G	Q	N	A	V	M	D	Y	S	Q	F	S	N
1086DGA	F	D	A	R	N	I	K	N	V	E	I	T	R	K	F	A	S	S	T	P	E	N	P	W	G	T	S	K	L	M	F	N	N	L	T	L	G	Q	N	A	V	M	D	Y	S	Q	F	S	N
22151AG	F	D	A	R	N	I	K	N	V	E	I	T	K	K	F	A	S	S	T	P	E	N	P	W	G	T	S	K	L	M	F	N	N	L	T	L	G	Q	N	A	V	M	D	Y	S	Q	F	S	N
2007IM	F	D	A	R	N	I	K	N	V	E	I	T	R	K	F	A	S	S	T	P	E	N	P	W	G	T	S	K	L	M	F	N	N	L	T	L	G	Q	N	A	I	M	D	Y	S	Q	F	S	N
A033IM	F	D	A	R	N	V	K	N	V	E	I	T	R	K	F	A	S	S	T	P	E	N	P	W	G	T	S	K	L	M	F	N	N	L	T	L	G	Q	N	A	V	M	D	Y	S	Q	F	S	N
22402AG	F	D	A	R	N	I	K	N	V	E	I	T	R	K	F	A	S	S	T	P	E	N	P	W	G	T	S	K	L	M	F	N	N	L	T	L	G	Q	N	A	V	M	D	Y	S	Q	F	S	N
3046G	F	D	A	R	N	I	K	N	V	E	I	T	R	K	F	A	S	S	T	P	E	N	P	W	G	T	S	K	L	M	F	N	N	L	T	L	G	Q	N	A	V	M	D	Y	S	Q	F	S	N
22093AG	F	D	A	R	N	V	K	N	V	E	I	T	R	K	F	A	S	S	T	P	E	N	P	W	G	T	S	K	L	M	F	N	N	L	T	L	G	Q	N	A	V	M	D	Y	S	Q	F	S	N
22003IM	F	D	A	R	N	V	K	N	V	E	I	T	R	K	F	A	S	S	T	P	E	N	P	W	G	T	S	K	L	M	F	N	N	L	T	L	G	Q	N	A	V	M	D	Y	S	Q	F	S	N
24004G	F	D	A	R	N	V	K	N	V	E	I	T	R	K	F	A	S	S	T	P	E	N	P	W	G	T	S	K	L	M	F	N	N	L	T	L	G	Q	N	A	V	M	D	Y	S	Q	F	S	N
3026IM	F	D	A	R	N	I	K	N	V	E	I	T	R	K	F	A	S	S	T	P	E	N	P	W	G	T	S	K	L	M	F	N	N	L	T	L	G	Q	N	A	V	M	D	Y	S	Q	F	S	N
2036AG	F	D	A	R	N	I	K	N	V	E	I	T	K	K	F	A	S	S	T	P	E	N	P	W	G	T	S	K	L	M	F	N	N	L	T	L	G	Q	N	A	I	M	D	Y	S	Q	F	S	N
22391AG	F	D	A	R	N	I	K	N	V	E	I	T	R	K	F	A	S	S	T	P	E	N	P	W	G	T	S	K	L	M	F	N	N	L	T	L	G	Q	N	A	V	M	D	Y	S	Q	F	S	N
22315AG	F	D	A	R	N	I	K	N	V	E	I	T	K	K	F	A	S	S	T	P	E	N	P	W	G	T	S	K	L	M	F	N	N	L	T	L	G	Q	N	A	V	M	D	Y	S	Q	F	S	N
22347G	F	D	A	R	N	I	K	N	V	E	I	T	R	K	F	A	S	S	T	P	E	N	P	W	G	T	S	K	L	M	F	N	N	L	T	L	G	Q	N	A	V	M	D	Y	S	Q	F	S	N
22335IM	F	D	A	R	N	I	K	N	V	E	I	T	R	K	F	A	S	S	T	P	E	N	P	W	G	T	S	K	L	M	F	N	N	L	T	L	G	Q	N	A	V	M	D	Y	S	Q	F	S	N
22312IM	F	D	A	R	N	I	K	N	V	E	I	T	R	K	F	A	S	S	T	P	E	N	P	W	G	T	S	K	L	M	F	N	N	L	T	L	G	Q	N	A	V	M	D	Y	S	Q	F	S	N
1088IGA	F	D	A	R	N	I	K	N	V	E	I	T	R	K	F	A	S	S	T	P	E	N	P	W	G	T	S	K	L	M	F	N	N	L	T	L	G	Q	N	A	I	M	D	Y	S	Q	F	S	N
22390IMDU	F	D	A	R	N	I	K	N	V	E	I	T	R	K	F	A	S	S	T	P	E	N	P	W	G	T	S	K	L	M	F	N	N	L	T	L	G	Q	N	A	V	M	D	Y	S	Q	F	S	N
2029IM	F	D	A	R	N	I	K	N	V	E	I	T	R	K	F	A	S	S	T	P	E	N	P	W	G	T	S	K	L	M	F	N	N	L	T	L	G	Q	N	A	V	M	D	Y	S	Q	F	S	N
1061DGA	F	D	A	R	N	V	K	N	V	E	I	T	R	K	F	A	S	S	T	P	E	N	P	W	G	T	S	K	L	M	F	N	N	L	T	L	G	Q	N	A	V	M	D	Y	S	Q	F	S	N
3125AG	F	D	A	R	N	V	K	N	V	E	I	T	R	K	F	A	S	S	T	P	E	N	P	W	G	T	S	K	L	M	F	N	N	L	T	L	G	Q	N	A	V	M	D	Y	S	Q	F	S	N
22371G	F	D	A	R	N	V	K	N	V	E	I	T	R	K	F	A	S	S	T	P	E	N	P	W	G	T	S	K	L	M	F	N	N	L	T	L	G	Q	N	A	V	M	D	Y	S	Q	F	S	N
2047IM	F	D	A	R	N	I	K	N	V	E	I	T	R	K	F	A	S	S	T	P	E	N	P	W	G	T	S	K	L	M	F	N	N	L	T	L	G	Q	N	A	V	M	D	Y	S	Q	F	S	N
22368G	F	D	A	R	N	I	K	N	V	E	I	T	R	K	F	A	S	S	T	P	E	N	P	W	G	T	S	K	L	M	F	N	N	L	T	L	G	Q	N	A	V	M	D	Y	S	Q	F	S	N
22346IM	F	D	A	R	N	I	K	N	V	E	I	T	R	K	F	A	S	S	T	P	E	N	P	W	G	T	S	K	L	M	F	N	N	L	T	L	G	Q	N	A	V	M	D	Y	S	Q	F	S	N
22331IM	F	D	A	R	N	I	K	N	V	E	I	T	R	K	F	A	S	S	T	P	E	N	P	W	G	T	S	K	L	M	F	N	N	L	T	L	G	Q	N	A	V	M	D	Y	S	Q	F	S	N
A077G	F	D	A	R	N	I	K	N	V	E	I	T	R	K	F	A	S	S	T	P	E	N	P	W	G	T	S	K	L	M	F	N	N	L	T	L	G	Q	N	A	V	M	D	Y	S	Q	F	S	N
22367IM	F	D	A	R	N	I	K	N	V	E	I	T	R	K	F	A	S	S	T	P	E	N	P	W	G	T	S	K	L	M	F	N	N	L	T	L	G	Q	N	A	V	M	D	Y	S	Q	F	S	N
1081DGA	F	D	A	R	N	I	K	N	V	E	I	T	R	K	F	A	S	S	T	P	E	N	P	W	G	T	S	K	L	M	F	N	N	L	T	L	G	Q	N	A	V	M	D	Y	S	Q	F	S	N
22370G	F	D	A	R	N	I	K	N	V	E	I	T	R	K	F	A	S	S	T	P	E	N	P	W	G	T	S	K	L	M	F	N	N	L	T	L	G	Q	N	A	V	M	D	Y	S	Q	F	S	N
22388G	F	D	A	R	N	I	K	N	V	E	I	T	R	K	F	A	S	S	T	P	E	N	P	W	G	T	S	K	L	M	F	N	N	L	T	L	G	Q	N	A	V	M	D	Y	S	Q	F	S	N
26024IM	F	D	A	R	N	I	K	N	V	E	I	T	R	K	F	A	S	S	T	P	E	N	P	W	G	T	S	K	L	M	F	N	N	L	T	L	G	Q	N	A	V	M	D	Y	S	Q	F	S	N
22317G	F	D	A	R	N	I	K	N	V	E	I	T	R	K	F	A	S	S	T	P	E	N	P	W	G	T	S	K	L	M	F	N	N	L	T	L	G	Q	N	A	V	M	D	Y	S	Q	F	S	N
22278GDU	F	D	A	R	N	I	K	N	V	E	I	T	R	K	F	A	S	S	T	P	E	N	P	W	G	T	S	K	L	M	F	N	N	L	T	L	G	Q	N	A	V	M	D	Y	S	Q	F	S	N
26093IGA	F	D	A	R	N	I	K	N	V	E	I	T	R	K	F	A	S	S	T	P	E	N	P	W	G	T	S	K	L	M	F	N	N	L	T	L	G	Q	N	A	V	M	D	Y	S	Q	F	S	N
3120AG	F	D	A	R	N	I	K	N	V	E	I	T	R	K	F	A	S	S	T	P	E	N	P	W	G	T	S	K	L	M	F	N	N	L	T	L	G	Q	N	A	V	M	D	Y	S	Q	F	S	N
1071MGA	F	D	A	R	N	I	K	N	V	E	I	T	R	K	F	A	S	S	T	P	E	N	P	W	G	T	S	K	L	M	F	N	N	L	T	L	G	Q	N	A	V	M	D	Y	S	Q	F	S	N
24012G	F	D	A	R	N	I	K	N	V	E	I	T	R	K	F	A	S	S	T	P	E	N	P	W	G	T	S	K	L	M	F	N	N	L	T	L	G	Q	N	A	V	M	D	Y	S	Q	F	S	N
1059IGA	F	D	A	R	N	I	K	N	V	E	I	T	R	K	F	A	S	S	T	P	E	N	P	W	G	T	S	K	L	M	F	N	N	L	T	L	G	Q	N	A	V	M	D	Y	S	Q	F	S	N
22046G	F	D	A	R	N	I	K	N	V	E	I	T	K	K	F	A	S	S	T	P	E	N	P	W	G	T	S	K	L	M	F	N	N	L	T	L	G	Q	N	A	V	M	D	Y	S	Q	F	S	N
22019AG	F	D	A	R	N	I	K	N	V	E	I	T	K	K	F	A	S	S	T	P	E	N	P	W	G	T	S	K	L	M	F	N	N	L	T	L	G	Q	N	A	V	M	D	Y	S	Q	F	S	N
1093DGA	F	D	A	R	N	I	K	N	V	E	I	T	R	K	F	A	S	S	T	P	E	N	P	W	G	T	S	K	L	M	F	N	N	L	T	L	G	Q	N	A	V	M	D	Y	S	Q	F	S	N
1039IGA	F	D	A	R	N	I	K	N	V	E	I	T	K	K	F	A	S	S	T	P	E	N	P	W	G	T	S	K	L	M	F	N	N	L	T	L	G	Q	N	A	V	M	D	Y	S	Q	F	S	N
26084DGA	F	D	A	R	N	I	K	N	V	E	I	T	R	K	F	A	S	S	T	P	E	N	P	W	G	T	S	K	L	M	F	N	N	L	T	L	G	Q	N	A	V	M	D	Y	S	Q	F	S	N
22377G	F	D	A	R	N	I	K	N	V	E	I	T	R	K	F	A	S	S	T	P	E	N	P	W	G	T	S	K	L	M	F	N	N	L	T	L	G	Q	N	A	V	M	D	Y	S	Q	F	S	N
22087G	F	D	A	R	N	I	K	N	V	E	I	T	R	K	F	A	S	S	T	P	E	N	P	W	G	T	S	K	L	M	F	N	N	L	T	L	G	Q	N	A	V	M	D	Y	S	Q	F	S	N
2040AG	F	D	A	R	N	I	K	N	V	E	I	T	R	K	F	A	S	S	T	P	E	N	P	W	G	T	S	K	L	M	F	N	N	L	T	L	G	Q	N	A	V	M	D	Y	S	Q	F	S	N
1057IGA	F	D	A	R	N	I	K	N	V	E	I	T	K	K	F	A	S	S	T	P	E	N	P	W	G	T	S	K	L	M	F	N	N	L	T	L	G	Q	N	A	V	M	D	Y	S	Q	F	S	N
3056AG	F	D	A	R	N	I	K	N	V	E	I	T	K	K	F	A	S	S	T	P	E	N	P	W	G	T	S	K	L	M	F	N	N	L	T	L	G	Q	N	A	V	M	D	Y	S	Q	F	S	N
3004IM	F	D	A	R	N	I	K	N	V	E	I	T	K	K	F	A	S	S	T	P	E	N	P	W	G	T	S	K	L	M	F	N	N	L	T	L	G	Q	N	A	V	M	D	Y	S	Q	F	S	N
2027IM	F	D	A	R	N	I	K	N	V	E	I	T	K	K	F	A	S	S	T	P	E	N	P	W	G	T	S	K	L	M	F	N	N	L	T	L	G	Q	N	A	V	M	D	Y	S	Q	F	S	N
22095AG	F	D	A	R	N	I	K	N	V	E	I	T	R	K	F	A	S	S	T	P	E	N	P	W	G	T	S	K	L	M	F	N	N	L	T	L	G	Q	N	A	V	M	D	Y	S	Q	F	S	N
22311AG	F	D	A	R	N	I	K	N	V	E	I	T	R	K	F	A	S	S	T	P	E	N	P	W	G	T	S	K	L	M	F	N	N	L	T	L	G	Q	N	A	V	M	D	Y	S	Q	F	S	N
22385G	F	D	A	R	N	I	K	N	V	E	I	T	R	K	F	A	S	S	T	P	E	N	P	W	G	T	S	K	L	M	F	N	N	L	T	L	G	Q	N	A	V	M	D	Y	S	Q	F	S	N
2021IM	F	D	A	R	N	I	K	N	V	E	I	T	R	K	F	A	S	S	T	P	E	N	P	W	G	T	S	K	L	M	F	N	N	L	T	L	G	Q	N	A	V	M	D	Y	S	Q	F	S	N
3096AG	F	D	A	R	N	I	K	N	V	E	I	T	R	K	F	A	S	S	T	P	E	N	P	W	G	T	S	K	L	M	F	N	N	L	T	L	G	Q	N	A	V	M	D	Y	S	Q	F	S	N
22351GDU	F	D	A	R	N	I	K	N	V	E	I	T	R	K	F	A	S	S	T	P	E	N	P	W	G	T	S	K	L	M	F	N	N	L	T	L	G	Q	N	A	V	M	D	Y	S	Q	F	S	N
2025G	F	D	A	R	N	I	K	N	V	E	I	T	R	K	F	A	S	S	T	P	E	N	P	W	G	T	S	K	L	M	F	N	N	L	T	L	G	Q	N	A	V	M	D	Y	S	Q	F	S	N
26083IGA	F	D	A	R	N	I	K	N	V	E	I	T	R	K	F	A	S	S	T	P	E	N	P	W	G	T	S	K	L	M	F	N	N	L	T	L	G	Q	N	A	V	M	D	Y	S	Q	F	S	N
3029G	F	D	A	R	N	I	K	N	V	E	I	T	R	K	F	A	S	S	T	P	E	N	P	W	G	T	S	K	L	M	F	N	N	L	T	L	G	Q	N	A	V	M	D	Y	S	Q	F	S	N
22308AG	F	D	A	R	N	I	K	N	V	E	I	T	R	K	F	A	S	S	T	P	E	N	P	W	G	T	S	K	L	M	F	N	N	L	T	L	G	Q	N	A	V	M	D	Y	S	Q	F	S	N
22021G	F	D	A	R	N	I	K	N	V	E	I	T	R	K	F	A	S	S	T	P	E	N	P	W	G	T	S	K	L	M	F	N	N	L	T	L	G	Q	N	A	V	M	D	Y	S	Q	F	S	N
22322AG	F	D	A	R	N	I	K	N	V	E	I	T	R	K	F	A	S	S	T	P	E	N	P	W	G	T	S	K	L	M	F	N	N	L	T	L	G	Q	N	A	V	M	D	Y	S	Q	F	S	N
1002IGA	F	D	A	R	N	I	K	N	V	E	I	T	R	K	F	A	S	S	T	P	E	N	P	W	G	T	S	K	L	M	F	N	N	L	T	L	G	Q	N	A	V	M	D	Y	S	Q	F	S	N
1102IGA	F	D	A	R	N	I	K	N	V	E	I	T	R	K	F	A	S	S	T	P	E	N	P	W	G	T	S	K	L	M	F	N	N	L	T	L	G	Q	N	A	V	M	D	Y	S	Q	F	S	N
2061AG	F	D	A	R	N	I	K	N	V	E	I	T	R	K	F	A	S	S	T	P	E	N	P	W	G	T	S	K	L	M	F	N	N	L	T	L	G	Q	N	A	V	M	D	Y	S	Q	F	S	N
22336AG	F	D	A	R	N	I	K	N	V	E	I	T	R	K	F	A	S	S	T	P	E	N	P	W	G	T	S	K	L	M	F	N	N	L	T	L	G	Q	N	A	V	M	D	Y	S	Q	F	S	N
22362G	F	D	A	R	N	I	K	N	V	E	I	T	R	K	F	A	S	S	T	P	E	N	P	W	G	T	S	K	L	M	F	N	N	L	T	L	G	Q	N	A	V	M	D	Y	S	Q	F	S	N
22352IM	F	D	A	R	N	I	K	N	V	E	I	T	R	K	F	A	S	S	T	P	E	N	P	W	G	T	S	K	L	M	F	N	N	L	T	L	G	Q	N	A	V	M	D	Y	S	Q	F	S	N
22013AG	F	D	A	R	N	I	K	N	V	E	I	T	R	K	F	A	S	S	T	P	E	N	P	W	G	T	S	K	L	M	F	N	N	L	T	L	G	Q	N	A	V	M	D	Y	S	Q	F	S	N
1095IGA	F	D	A	R	N	V	K	N	V	E	I	T	R	K	F	A	S	S	T	P	E	N	P	W	G	T	S	K	L	M	F	N	N	L	T	L	G	Q	N	A	V	M	D	Y	S	Q	F	S	N
1077IGA	F	D	A	R	N	I	K	N	V	E	I	T	R	K	F	A	S	S	T	P	E	N	P	W	G	T	S	K	L	M	F	N	N	L	T	L	G	Q	N	A	V	M	D	Y	S	Q	F	S	N
	261 and 321 alignment positions
	Table 2 residue alignment positions
	Table3 reside alignment positions
[truncated: 201 more columns]

## Sheet: Info
Title	CodonPROTalinCol.txt
Format
DataType	Protein
100
Number Sites	491
Identical	.
Missing	?
Indel	-
